# Supplementary material
Source: publisher figshare collection journal article supplement (https://acs.figshare.com/ndownloader/files/9282247)
Supplement: Supplementary file 1 [file 9282247]

# Lipid Peroxidation and Cyclooxygenase Enzyme Inhibitory Compounds from *Prangos haussknechtii*

Amila A. Dissanayake,<sup>†</sup> Baram A. H. Ameen,<sup>‡</sup> and Muraleedharan G. Nair<sup>†,\*</sup>

<sup>†</sup>Bioactive Natural Products and Phytoceuticals Laboratory, Department of Horticulture,  
Michigan State University, East Lansing, 48824, MI, USA

<sup>‡</sup> Department of Science, Charmo University, 46023 Chamchamal-Sualimani, Kurdistan Region,  
Iraq

## Supplemental data

For compound **1**

|                                                                                                       |    |
|-------------------------------------------------------------------------------------------------------|----|
| <b>Figure S1.</b> <sup>1</sup> H NMR spectrum of <b>1</b> in CDCl <sub>3</sub> .....                  | 3  |
| <b>Figure S2.</b> <sup>13</sup> C NMR spectrum of <b>1</b> in CDCl <sub>3</sub> .....                 | 4  |
| <b>Figure S3.</b> HSQC spectrum of <b>1</b> in CDCl <sub>3</sub> .....                                | 5  |
| <b>Figure S4.</b> HMBC spectrum of <b>1</b> in CDCl <sub>3</sub> .....                                | 6  |
| <b>Figure S5.</b> <sup>1</sup> H– <sup>1</sup> H COSY spectrum of <b>1</b> in CDCl <sub>3</sub> ..... | 7  |
| <b>Figure S6.</b> NOESY spectrum of <b>1</b> in CDCl <sub>3</sub> (δ <sub>H</sub> = 4.85).....        | 8  |
| <b>Figure S7.</b> HR-ESITOFMS (positive) of <b>1</b> .....                                            | 9  |
| <b>Figure S8.</b> Elemental composition of <b>1</b> calculated by single mass analysis.....           | 10 |
| <b>Figure S9.</b> IR spectrum of <b>1</b> in KBr.....                                                 | 11 |
| <b>Figure S10.</b> UV/Vis spectrum of <b>1</b> in methanol.....                                       | 12 |

For compound **2**

|                                                                                                 |    |
|-------------------------------------------------------------------------------------------------|----|
| <b>Figure S11.</b> <sup>1</sup> H NMR spectrum of <b>2</b> in CDCl <sub>3</sub> .....           | 13 |
| <b>Figure S12.</b> <sup>13</sup> C NMR spectrum of <b>2</b> in CDCl <sub>3</sub> .....          | 14 |
| <b>Figure S13.</b> HMBC spectrum of <b>2</b> in CDCl <sub>3</sub> .....                         | 15 |
| <b>Figure S14.</b> NOESY spectrum of <b>2</b> in CDCl <sub>3</sub> (δ <sub>H</sub> = 4.84)..... | 16 |
| <b>Figure S15.</b> HR-ESITOFMS (positive) of <b>2</b> .....                                     | 17 |
| <b>Figure S16.</b> Elemental composition of <b>2</b> calculated by single mass analysis.....    | 18 |
| <b>Figure S17.</b> IR spectrum of <b>2</b> in KBr.....                                          | 19 |
| <b>Figure S18.</b> UV/Vis spectrum of <b>2</b> in methanol.....                                 | 20 |

For compound **3**

|                                                                                                        |    |
|--------------------------------------------------------------------------------------------------------|----|
| <b>Figure S19.</b> <sup>1</sup> H NMR spectrum of <b>3</b> in CDCl <sub>3</sub> .....                  | 21 |
| <b>Figure S20.</b> <sup>13</sup> C NMR spectrum of <b>3</b> in CDCl <sub>3</sub> .....                 | 22 |
| <b>Figure S21.</b> DEPT spectrum of <b>3</b> in CDCl <sub>3</sub> .....                                | 23 |
| <b>Figure S22.</b> HSQC spectrum of <b>3</b> in CDCl <sub>3</sub> .....                                | 24 |
| <b>Figure S23.</b> HMBC spectrum of <b>3</b> in CDCl <sub>3</sub> .....                                | 25 |
| <b>Figure S24.</b> <sup>1</sup> H– <sup>1</sup> H COSY spectrum of <b>3</b> in CDCl <sub>3</sub> ..... | 26 |
| <b>Figure S25.</b> NOESY spectrum of <b>3</b> in CDCl <sub>3</sub> .....                               | 27 |
| <b>Figure S26.</b> HR-ESITOFMS (negative) of <b>3</b> .....                                            | 28 |
| <b>Figure S27.</b> Elemental composition of <b>3</b> calculated by single mass analysis.....           | 29 |
| <b>Figure S28.</b> IR spectrum of <b>3</b> in KBr.....                                                 | 30 |
| <b>Figure S29.</b> UV/Vis spectrum of <b>3</b> in methanol.....                                        | 31 |

For compound **4**

|                                                                                                      |    |
|------------------------------------------------------------------------------------------------------|----|
| <b>Figure S30.</b> <sup>1</sup> H NMR spectrum of <b>4</b> in D <sub>2</sub> O.....                  | 32 |
| <b>Figure S31.</b> <sup>13</sup> C NMR spectrum of <b>4</b> in D <sub>2</sub> O.....                 | 33 |
| <b>Figure S32.</b> DEPT spectrum of <b>4</b> in D <sub>2</sub> O.....                                | 34 |
| <b>Figure S33.</b> HSQC spectrum of <b>4</b> in D <sub>2</sub> O.....                                | 35 |
| <b>Figure S34.</b> HR-ESITOFMS (positive) of <b>4</b> .....                                          | 36 |
| <b>Figure S35.</b> Elemental composition of <b>4</b> calculated by single mass analysis.....         | 37 |
| <b>Figure S36.</b> IR spectrum of <b>4</b> in KBr.....                                               | 38 |
| <b>Figure S37.</b> UV/Vis spectrum of <b>4</b> water.....                                            | 39 |
| <b>Figure S38.</b> HOMODEC NMR spectrum of <b>4</b> D <sub>2</sub> O (δ <sub>H</sub> = 3.71) .....   | 40 |
| <b>Figure S39.</b> HOMODEC NMR spectrum of <b>4</b> D <sub>2</sub> O (δ <sub>H</sub> = 1.67) .....   | 41 |
| <b>Figure S40.</b> HOMODEC NMR spectrum of <b>4</b> D <sub>2</sub> O (δ <sub>H</sub> = 3.64) .....   | 42 |
| <b>Figure S41.</b> HOMODEC NMR spectrum of <b>4</b> D <sub>2</sub> O (δ <sub>H</sub> = 1.94) .....   | 43 |
| <b>Figure S42.</b> HOMODEC NMR spectrum of <b>4</b> D <sub>2</sub> O (δ <sub>H</sub> = 1.45) .....   | 44 |
| <b>Figure S43.</b> HOMODEC NMR spectrum of <b>4</b> D <sub>2</sub> O (δ <sub>H</sub> = 0.97) .....   | 45 |
| <b>Figure S44.</b> HMBC spectrum of <b>4</b> in D <sub>2</sub> O.....                                | 46 |
| <b>Figure S45.</b> <sup>1</sup> H- <sup>1</sup> H COSY spectrum of <b>4</b> in D <sub>2</sub> O..... | 47 |
| <b>Figure S46.</b> NOESY spectrum of <b>4</b> in D <sub>2</sub> O.....                               | 48 |

Bio assay results

|                                                                                                                     |    |
|---------------------------------------------------------------------------------------------------------------------|----|
| <b>Table 1.</b> MTT, LPO and COX assay results for compounds <b>1-4</b> isolated from <i>P. haussknechtii</i> ..... | 49 |
|---------------------------------------------------------------------------------------------------------------------|----|

For known compounds

|                                                                                                       |    |
|-------------------------------------------------------------------------------------------------------|----|
| <b>Figure S47.</b> Chemical structures of known compounds isolated from <i>P. haussknechtii</i> ..... | 50 |
| <b>Figure S48.</b> <sup>1</sup> H NMR spectrum of isoimperatorin in CDCl <sub>3</sub> .....           | 51 |
| <b>Figure S49.</b> <sup>13</sup> C NMR spectrum of isoimperatorin in CDCl <sub>3</sub> .....          | 52 |
| <b>Figure S50.</b> HSQC spectrum of isoimperatorin in CDCl <sub>3</sub> .....                         | 53 |
| <b>Figure S51.</b> <sup>1</sup> H NMR spectrum of osthol in CDCl <sub>3</sub> .....                   | 54 |
| <b>Figure S52.</b> <sup>13</sup> C NMR spectrum of osthol in CDCl <sub>3</sub> .....                  | 55 |
| <b>Figure S53.</b> <sup>1</sup> H NMR spectrum of oxypeucedanin in CDCl <sub>3</sub> .....            | 56 |
| <b>Figure S54.</b> <sup>13</sup> C NMR spectrum of oxypeucedanin in CDCl <sub>3</sub> .....           | 57 |
| <b>Figure S55.</b> <sup>1</sup> H NMR spectrum of malic acid in D <sub>2</sub> O.....                 | 58 |
| <b>Figure S56.</b> <sup>13</sup> C NMR spectrum of malic acid in D <sub>2</sub> O.....                | 59 |
| <b>Figure S57.</b> <sup>1</sup> H NMR spectrum of <i>p</i> -coumaric acid in CD <sub>3</sub> OD.....  | 60 |
| <b>Figure S58.</b> <sup>13</sup> C NMR spectrum of <i>p</i> -coumaric acid in CD <sub>3</sub> OD..... | 61 |
| <b>Figure S59.</b> <sup>1</sup> H NMR spectrum of 3-phenyllactic acid in D <sub>2</sub> O.....        | 62 |
| <b>Figure S60.</b> <sup>13</sup> C NMR spectrum of 3-phenyllactic acid in D <sub>2</sub> O.....       | 63 |
| <b>Figure S61.</b> DEPT spectrum of 3-phenyllactic acid in D <sub>2</sub> O.....                      | 64 |
| <b>Figure S62.</b> HMBC spectrum of 3-phenyllactic acid in D <sub>2</sub> O.....                      | 65 |
| <b>Figure S63.</b> <sup>1</sup> H NMR spectrum of ferulic acid in CD <sub>3</sub> OD.....             | 66 |
| <b>Figure S64.</b> <sup>13</sup> C NMR spectrum of ferulic acid in CD <sub>3</sub> OD.....            | 67 |
| <b>Figure S65.</b> DEPT spectrum of ferulic acid in CD <sub>3</sub> OD.....                           | 68 |

Bio assay results

|                                                                                                           |    |
|-----------------------------------------------------------------------------------------------------------|----|
| <b>Table 2.</b> LPO and COX assay results for known compounds isolated from <i>P. haussknechtii</i> ..... | 69 |
|-----------------------------------------------------------------------------------------------------------|----|

Figure S1. <sup>1</sup>H NMR spectrum of **1** in CDCl<sub>3</sub>

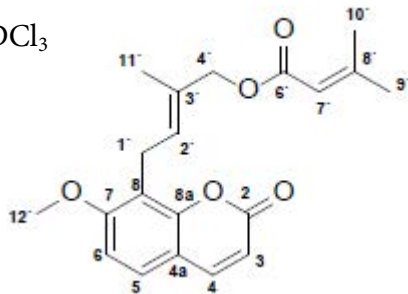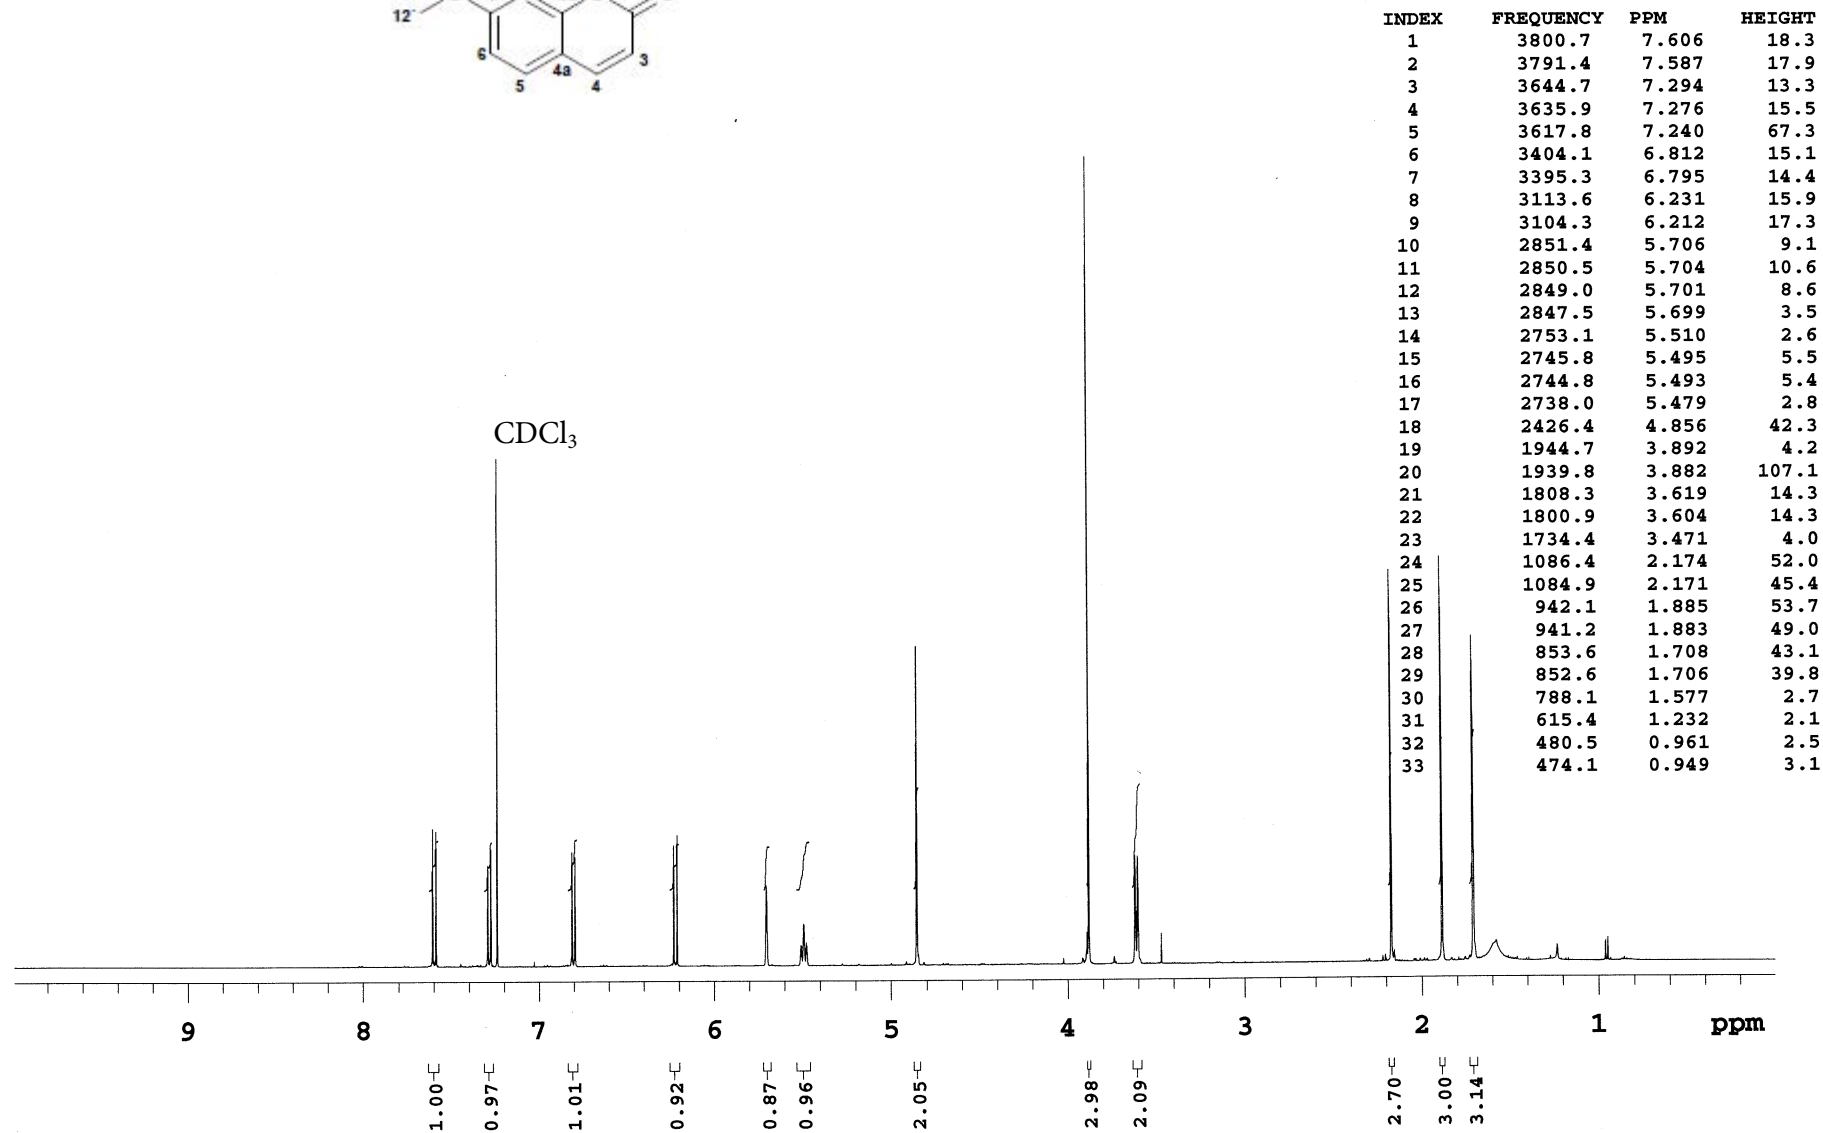

Figure S2.  $^{13}\text{C}$  NMR spectrum of **1** in  $\text{CDCl}_3$

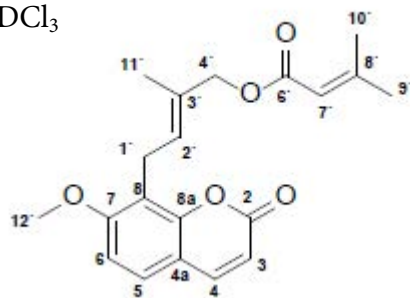

$\text{CDCl}_3$

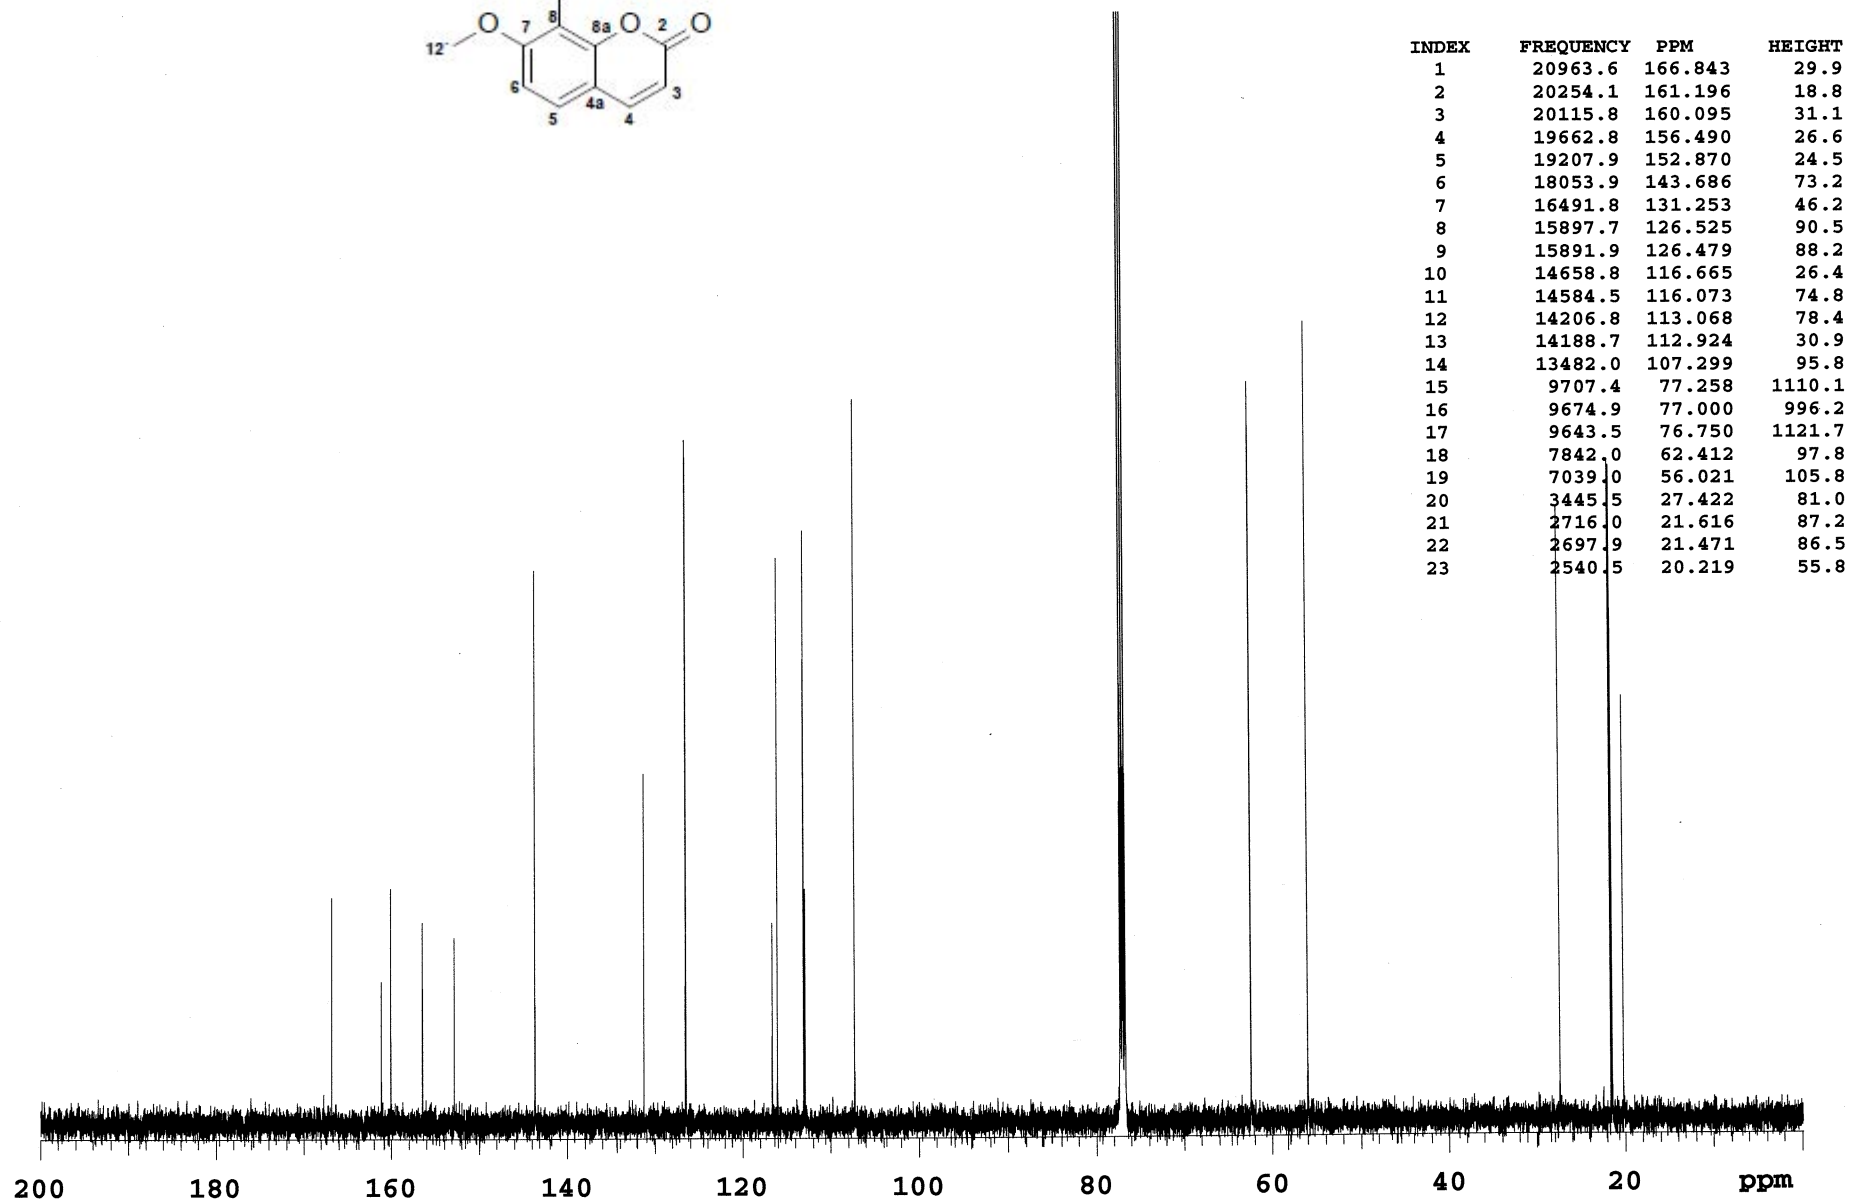

**Figure S3.** HSQC spectrum of **1** in CDCl<sub>3</sub>

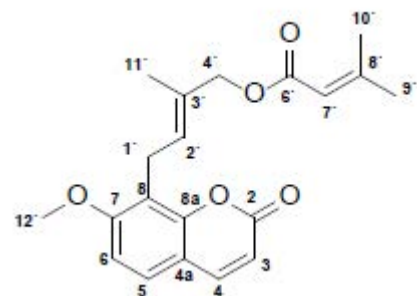

AD\_117\_76D

Sample Name AD\_117\_76D  
Date collected 2016-02-08

Pulse sequence gHSQCAD  
Solvent cdcl3

Temperature 25  
Spectrometer ormuzd-vnmrs500

Study owner amilad  
Operator amilad

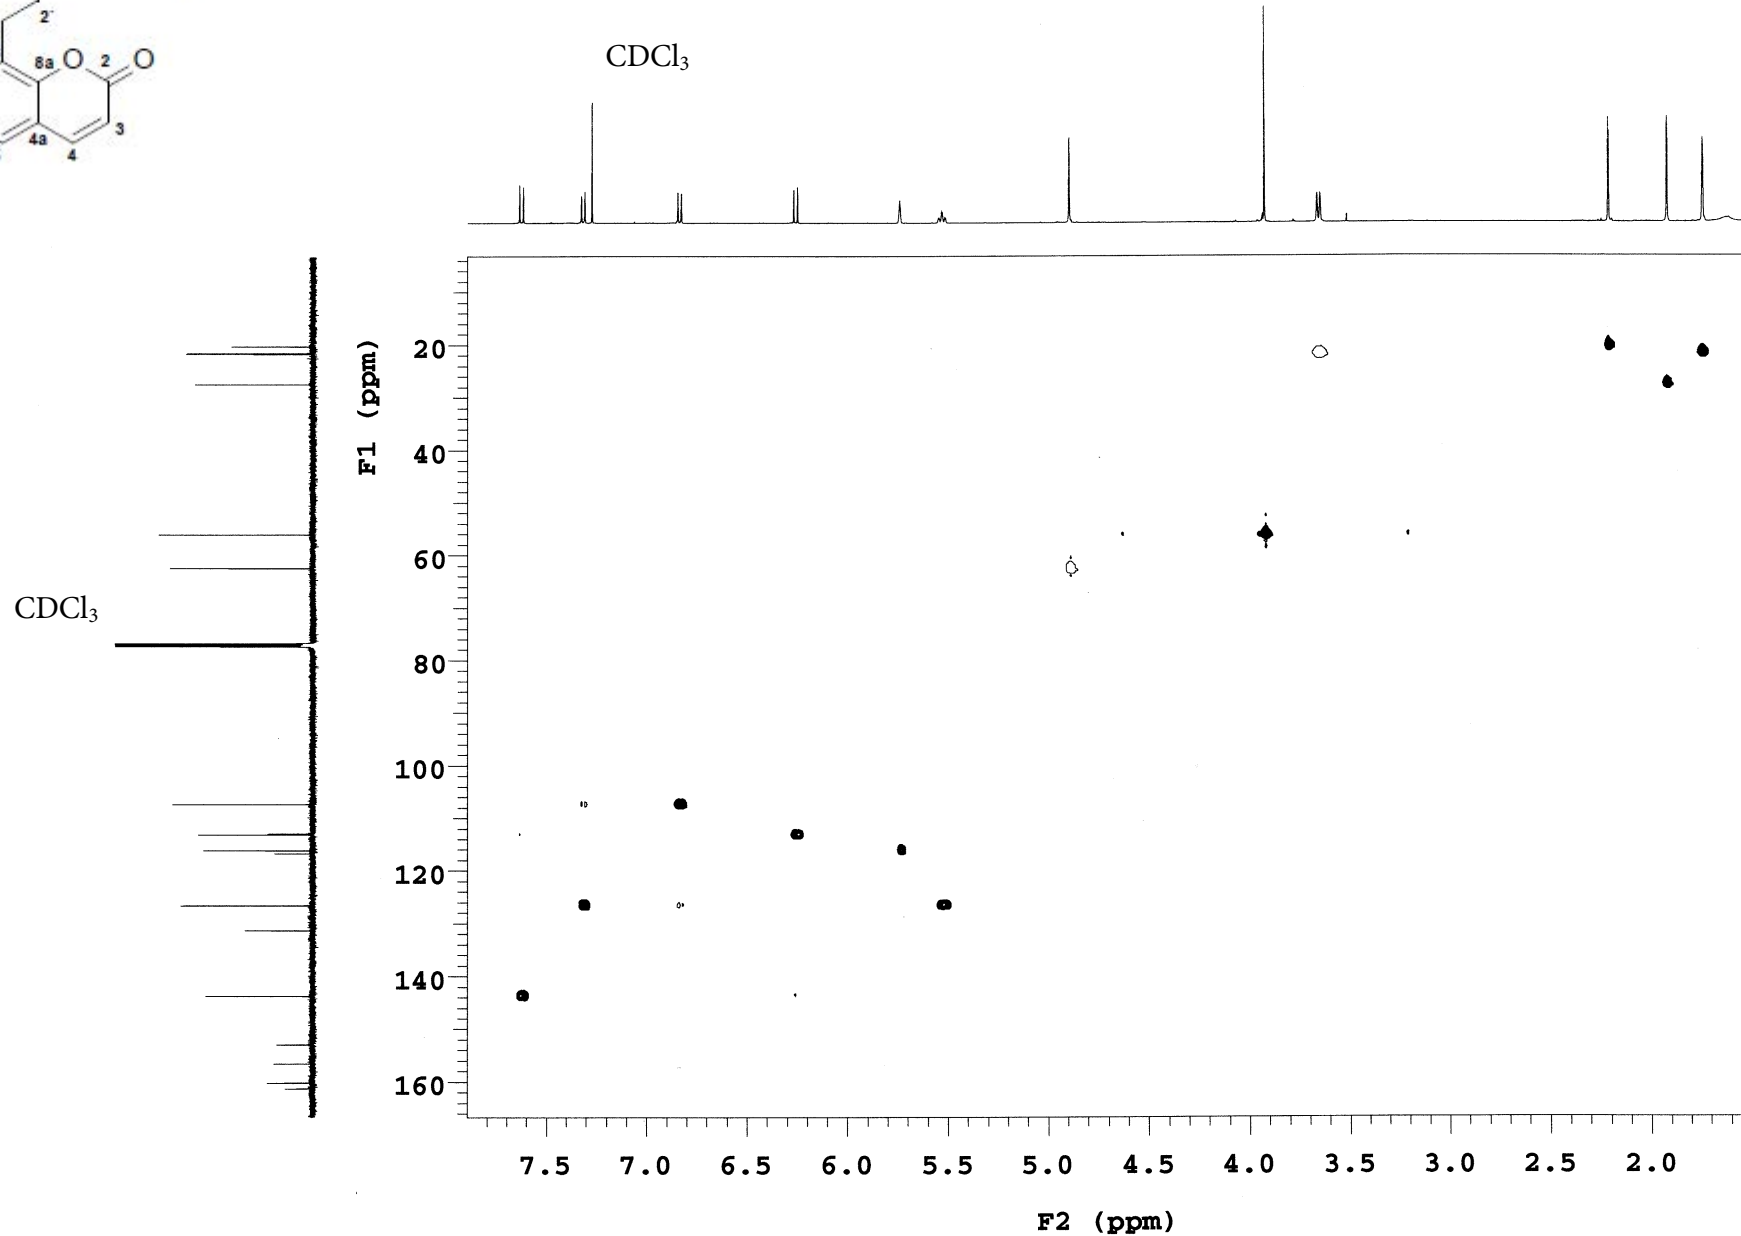

**Figure S4.** HMBC spectrum of **1** in CDCl<sub>3</sub>

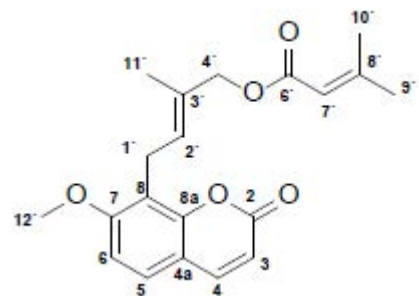

AD\_117\_76D

Sample Name AD\_117\_76D  
Date collected 2016-02-09

Pulse sequence gHMBCAD  
Solvent cdcl3

Temperature 25  
Spectrometer ormuzd-vnmrs500

Study owner amilad  
Operator amilad

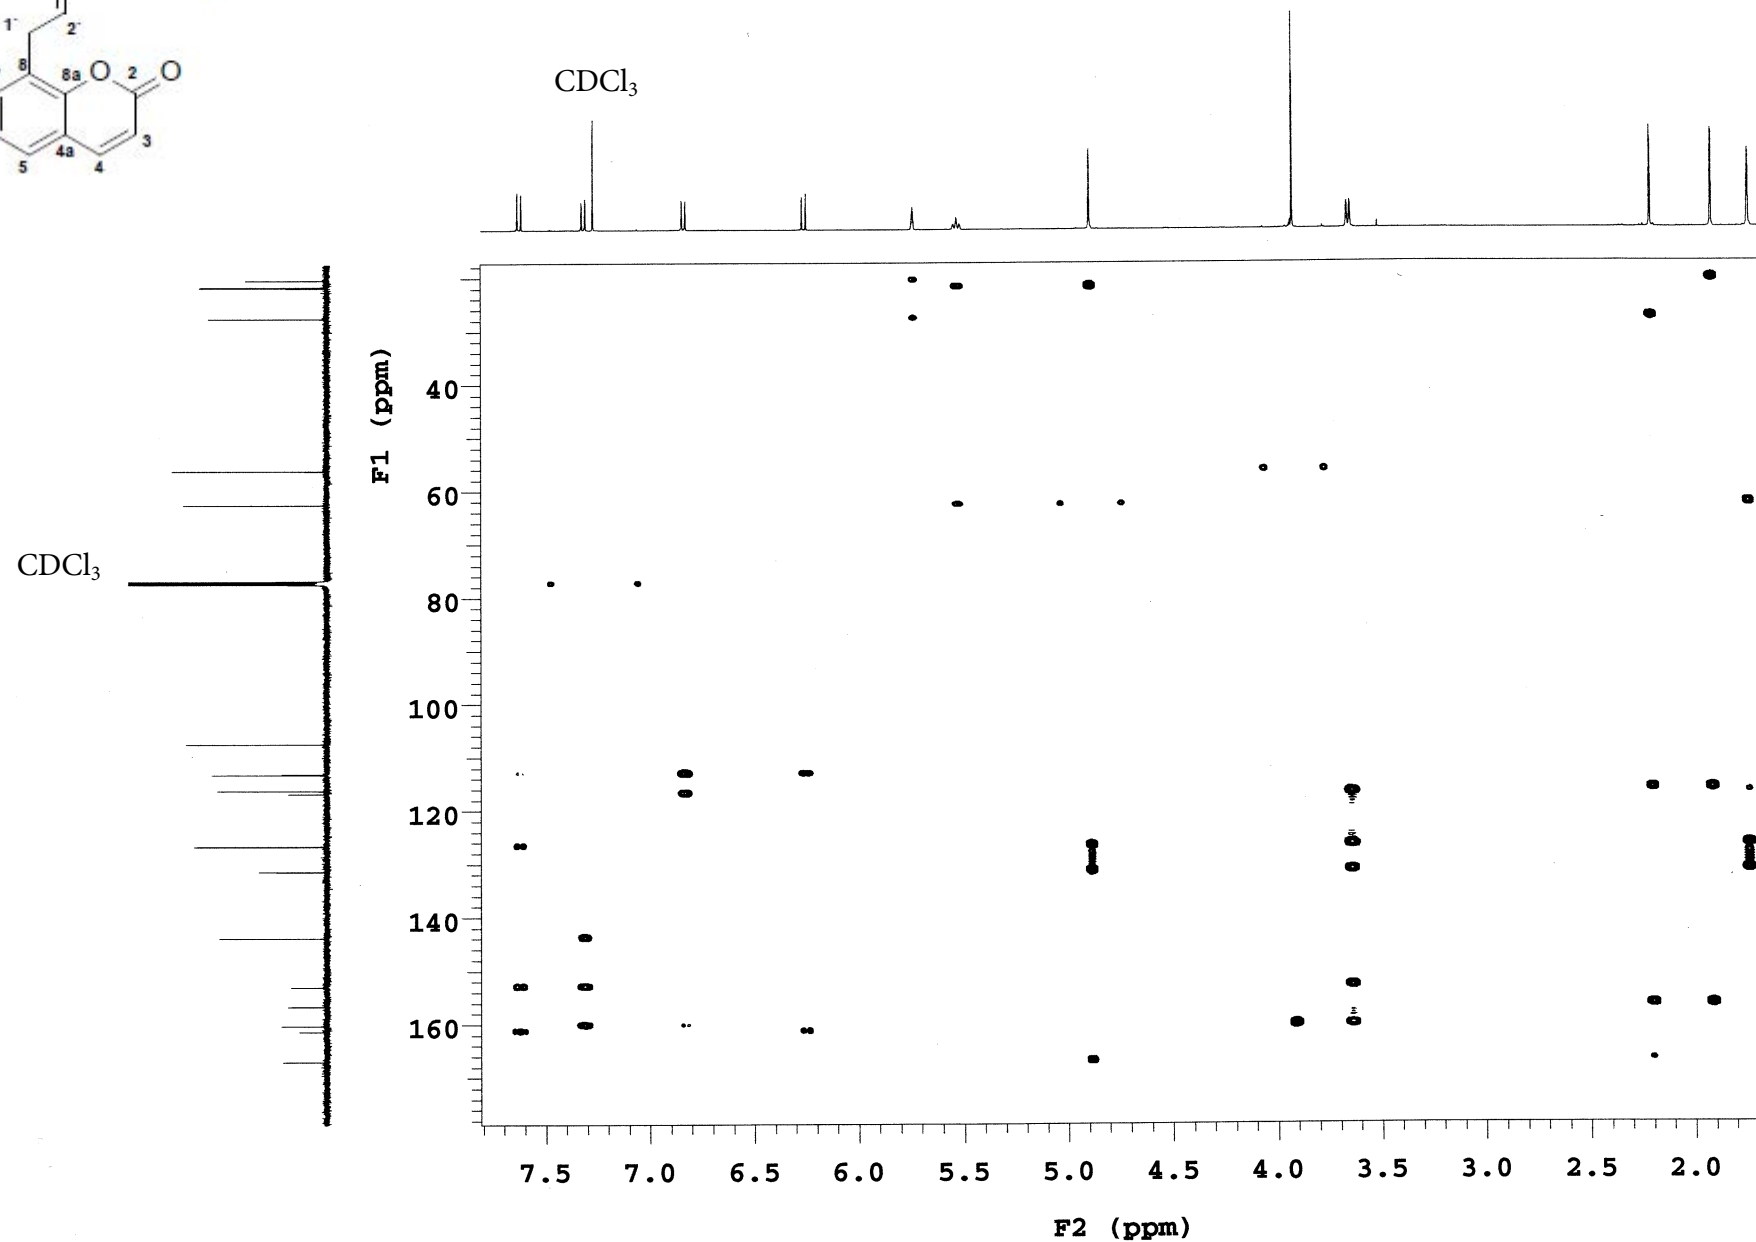

**Figure S5.**  $^1\text{H}$ - $^1\text{H}$  COSY spectrum of **1** in  $\text{CDCl}_3$

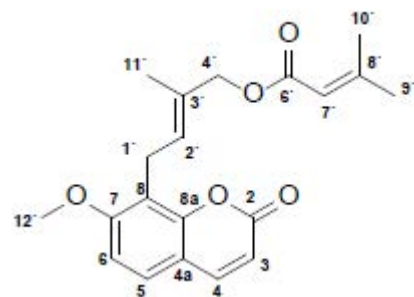

AD\_117\_76D

Sample Name **AD\_117\_76D**  
Date collected **2016-02-10**

Pulse sequence **gCOSY**  
Solvent **cdcl3**

Temperature **25**  
Spectrometer **ormuzd-vnmrs500**

Study owner **amilad**  
Operator **amilad**

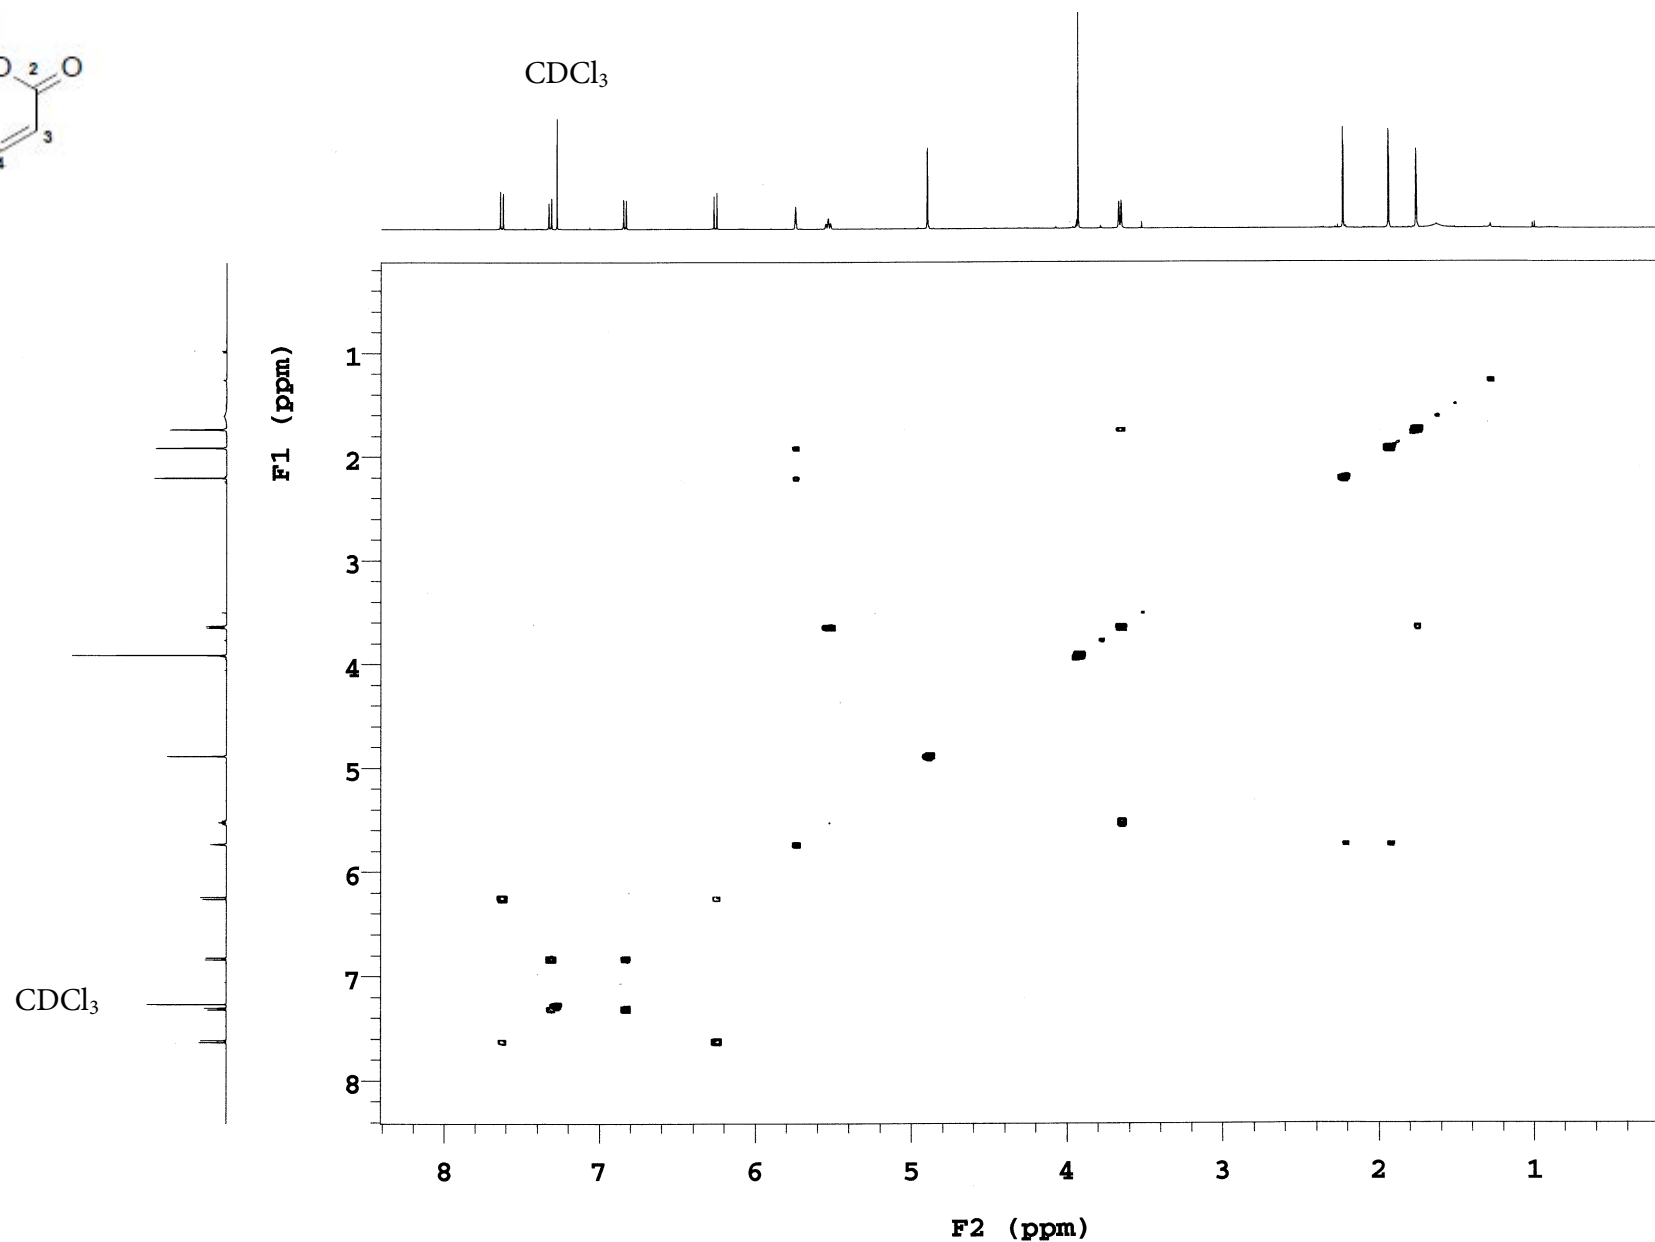

**Figure S6.** NOESY spectrum of **1** in CDCl<sub>3</sub> ( $\delta_{\text{H}} = 4.85$ )

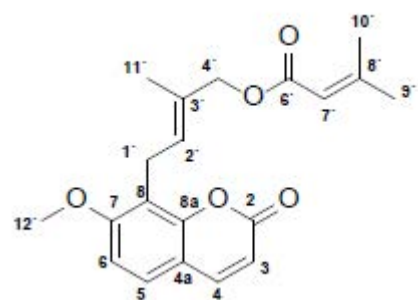

| INDEX | FREQUENCY | PPM   | HEIGHT |
|-------|-----------|-------|--------|
| 1     | 2763.5    | 5.530 | 52.8   |
| 2     | 2755.6    | 5.515 | 109.8  |
| 3     | 2747.8    | 5.499 | 53.2   |
| 4     | 859.5     | 1.720 | 10.7   |

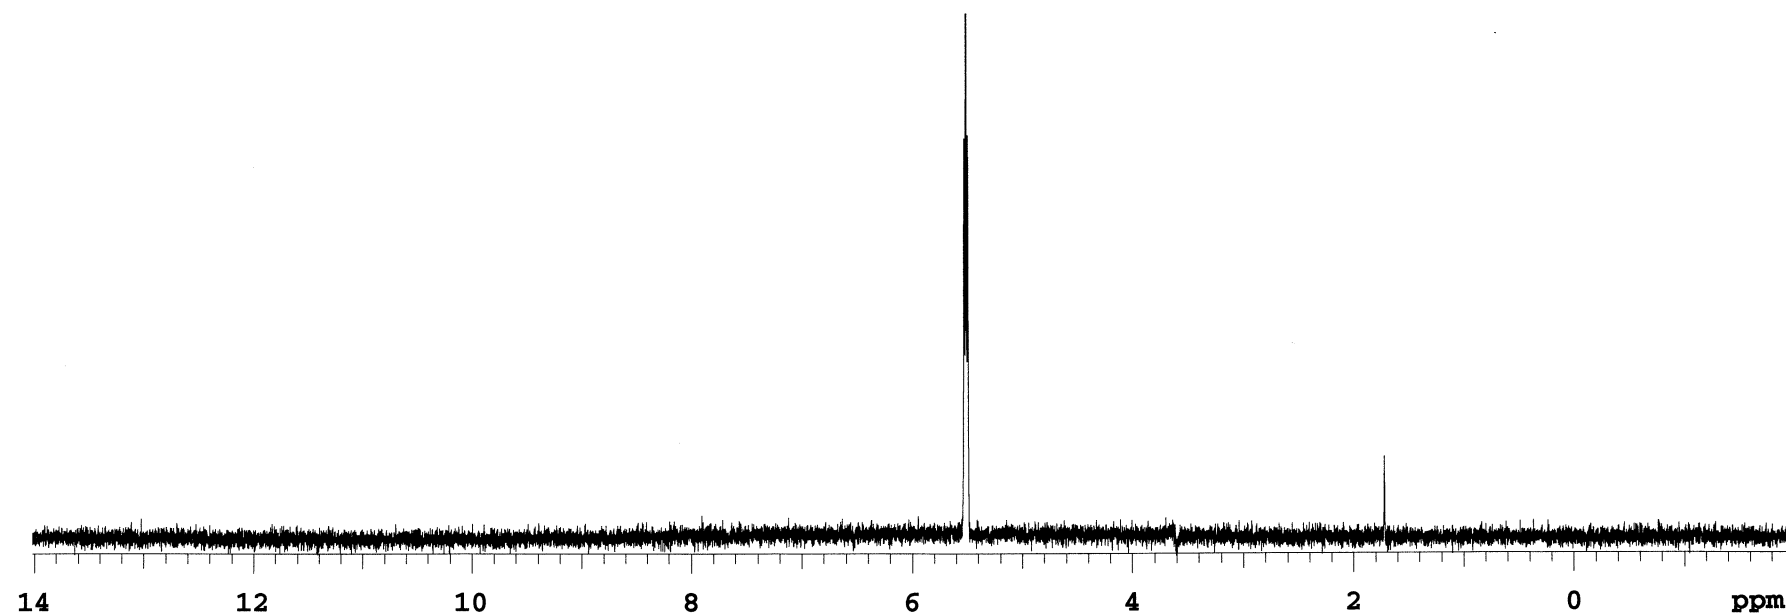



**Figure S7.** HR-ESITOFMS (positive) of **1**

AD\_117\_76D

XS2\_121616\_010 21 (0.256) Cm (18:27)

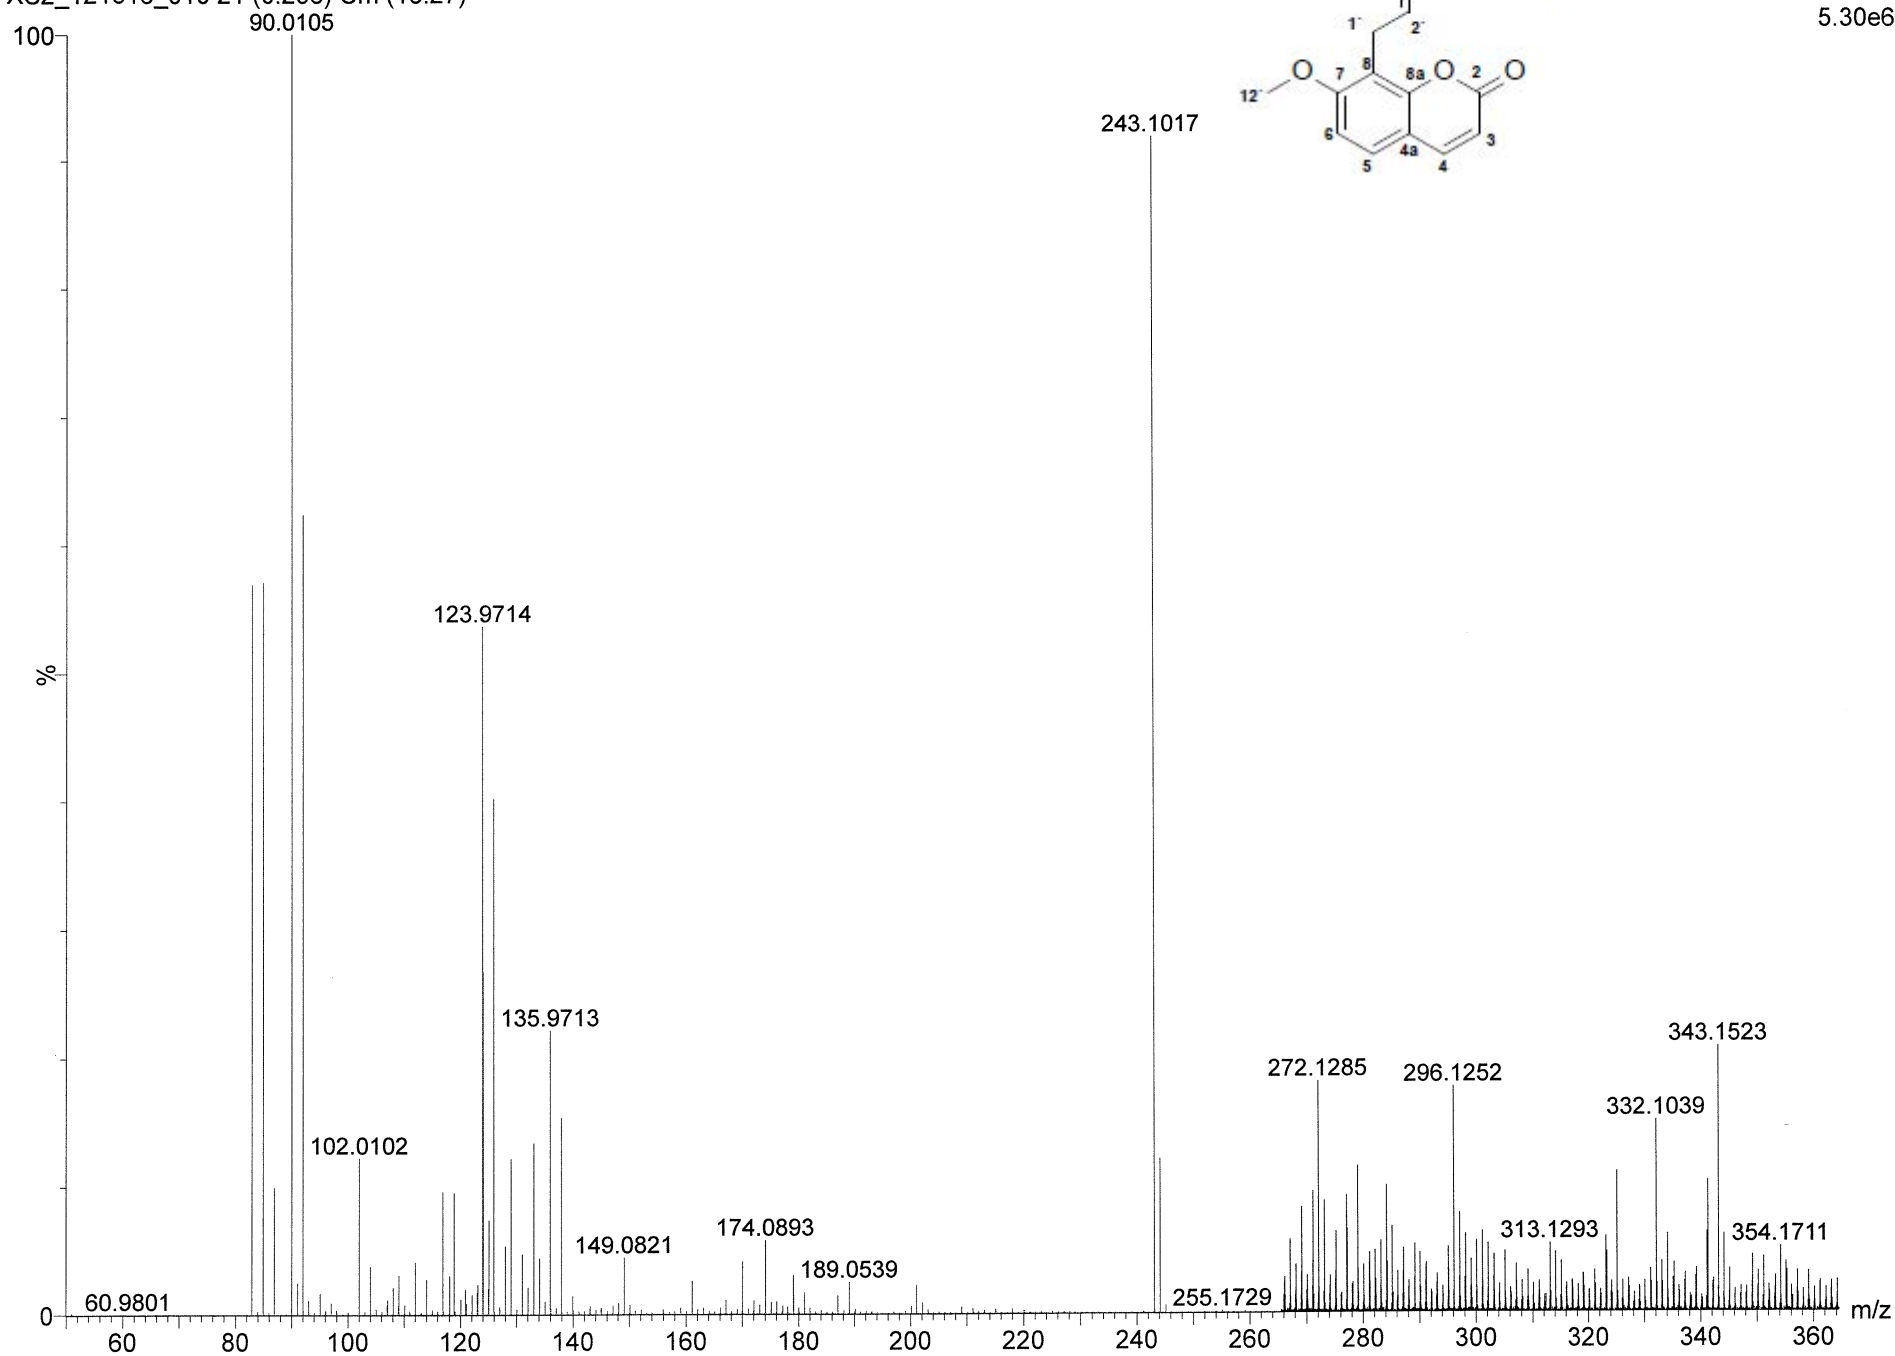

**Figure S8.** Elemental composition of **1** calculated by single mass analysis

## Elemental Composition Report

### Single Mass Analysis

Tolerance = 10.0 PPM / DBE: min = -1.5, max = 100.0

Element prediction: Off

Number of isotope peaks used for i-FIT = 3

Monoisotopic Mass, Even Electron Ions

8 formula(e) evaluated with 1 results within limits (all results (up to 1000) for each mass)

Elements Used:

C: 0-20 H: 0-60 O: 0-5

AD\_117\_76D

XS2\_121616\_010 21 (0.256)

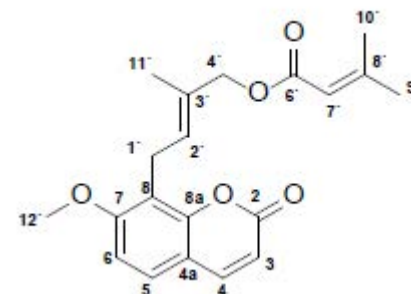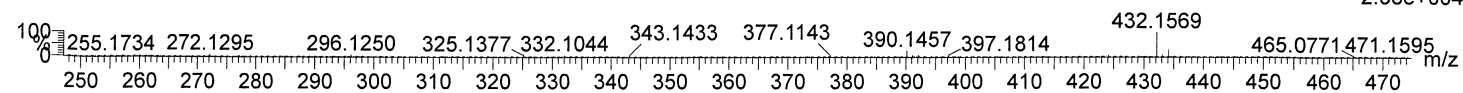

1: TOF MS AP+  
2.38e+004

Minimum: -1.5  
Maximum: 10.0 10.0 100.0

| Mass     | Calc. Mass | mDa  | PPM  | DBE | i-FIT | Norm | Conf(%) | Formula    |
|----------|------------|------|------|-----|-------|------|---------|------------|
| 343.1523 | 343.1545   | -2.2 | -6.4 | 9.5 | 226.9 | n/a  | n/a     | C20 H23 O5 |

Figure S9. IR spectrum of **1** in KBr

Sat Feb 04 01:26:49:75 2017

AD11171761

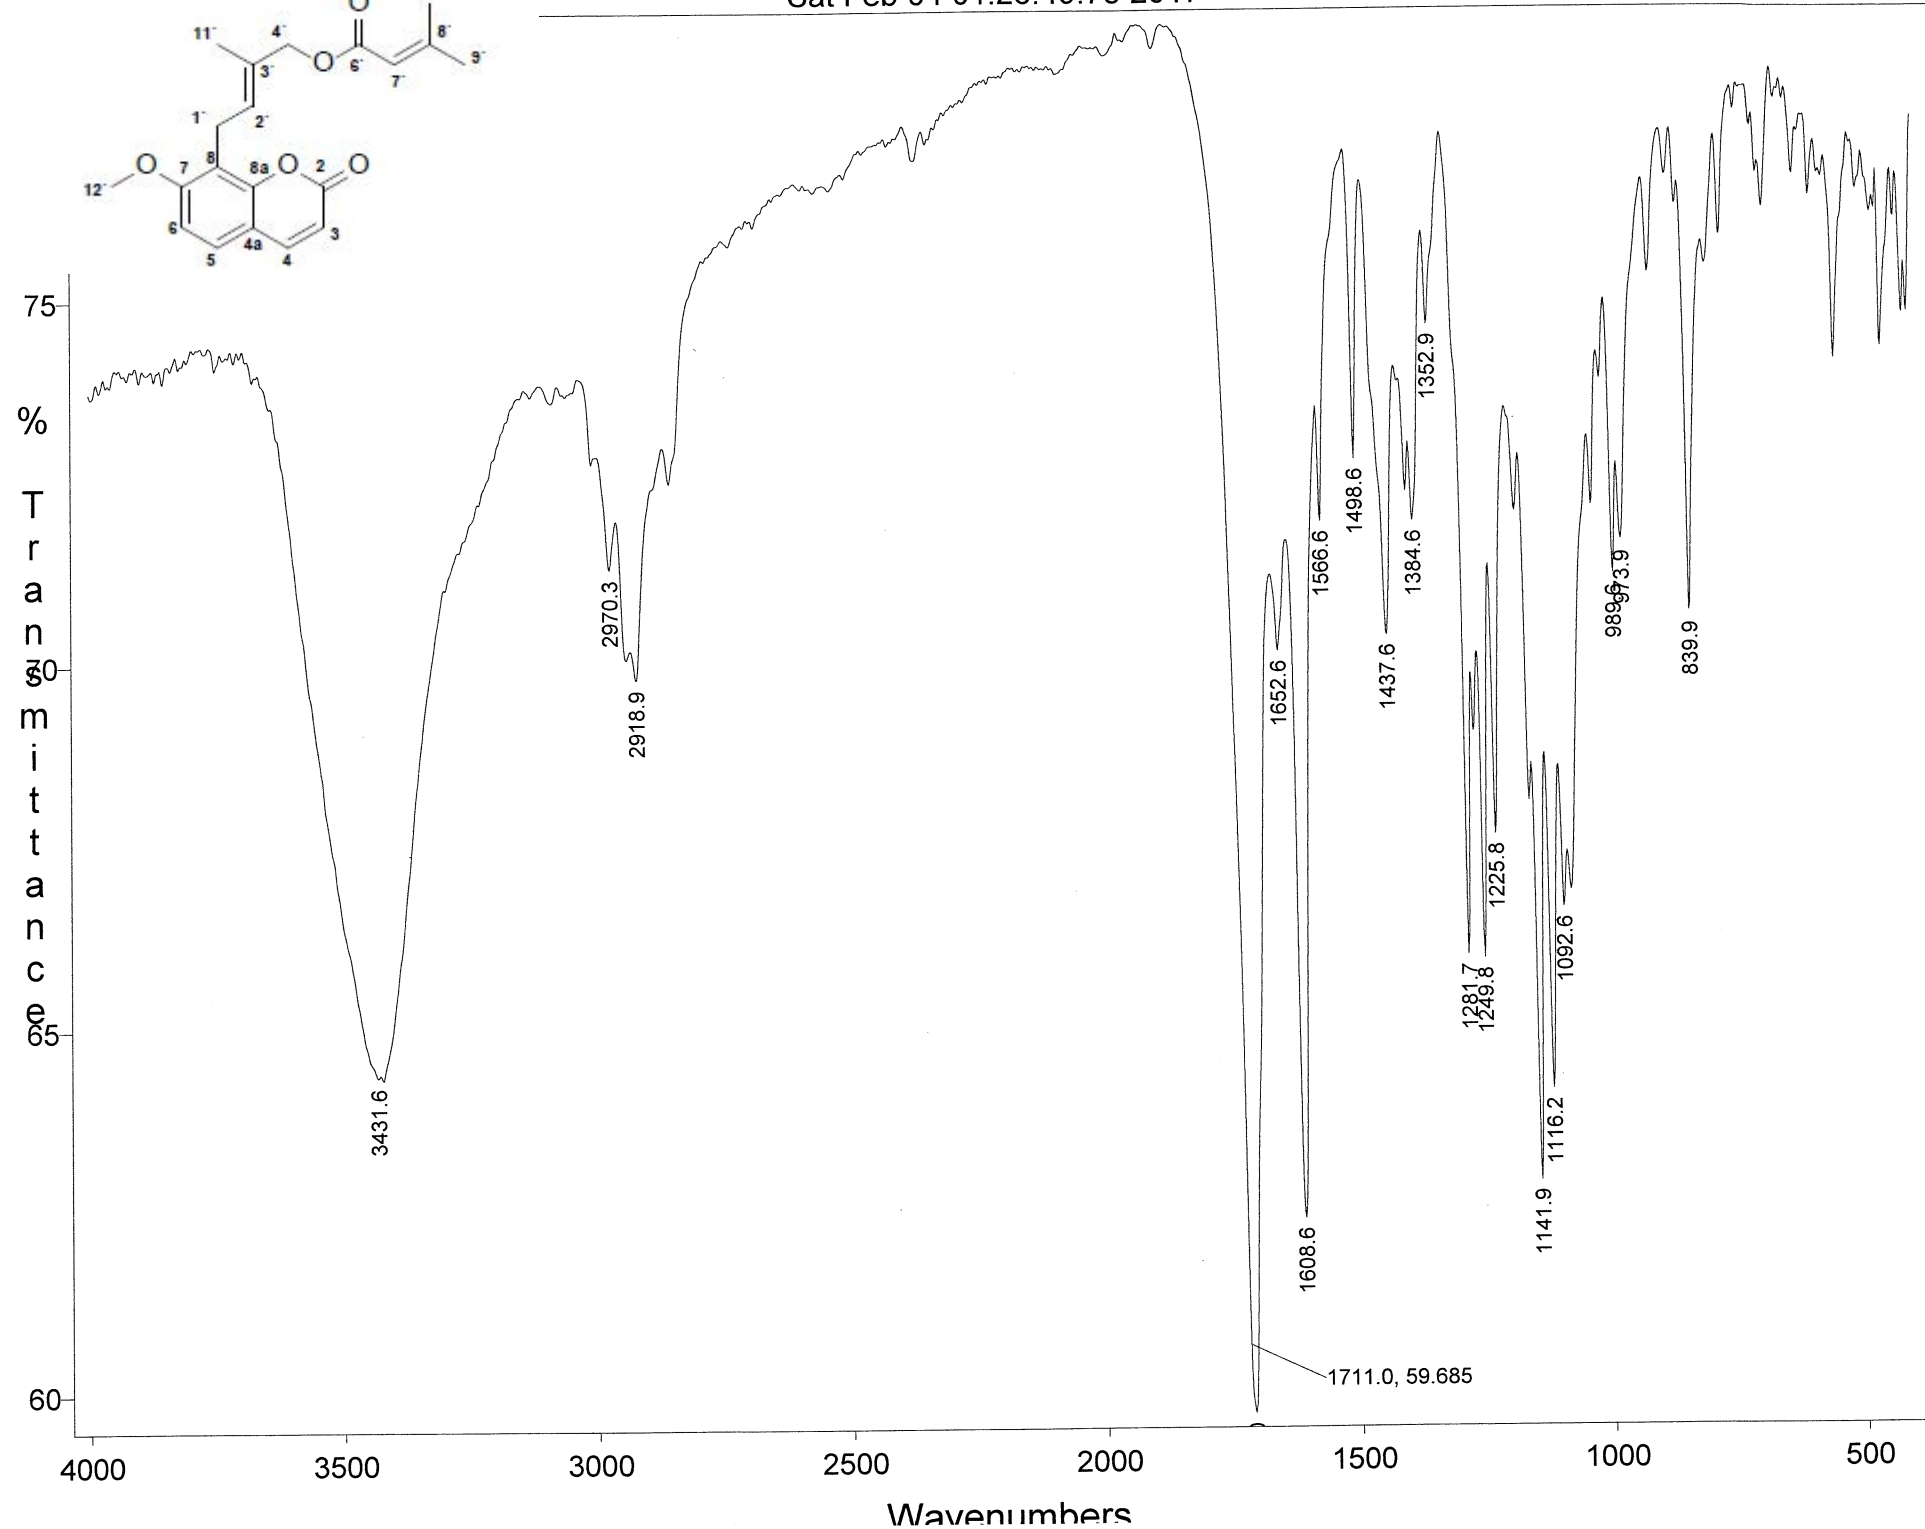

## Overlay Spectrum Graph Report

02/03/2017 12:27:14 PM

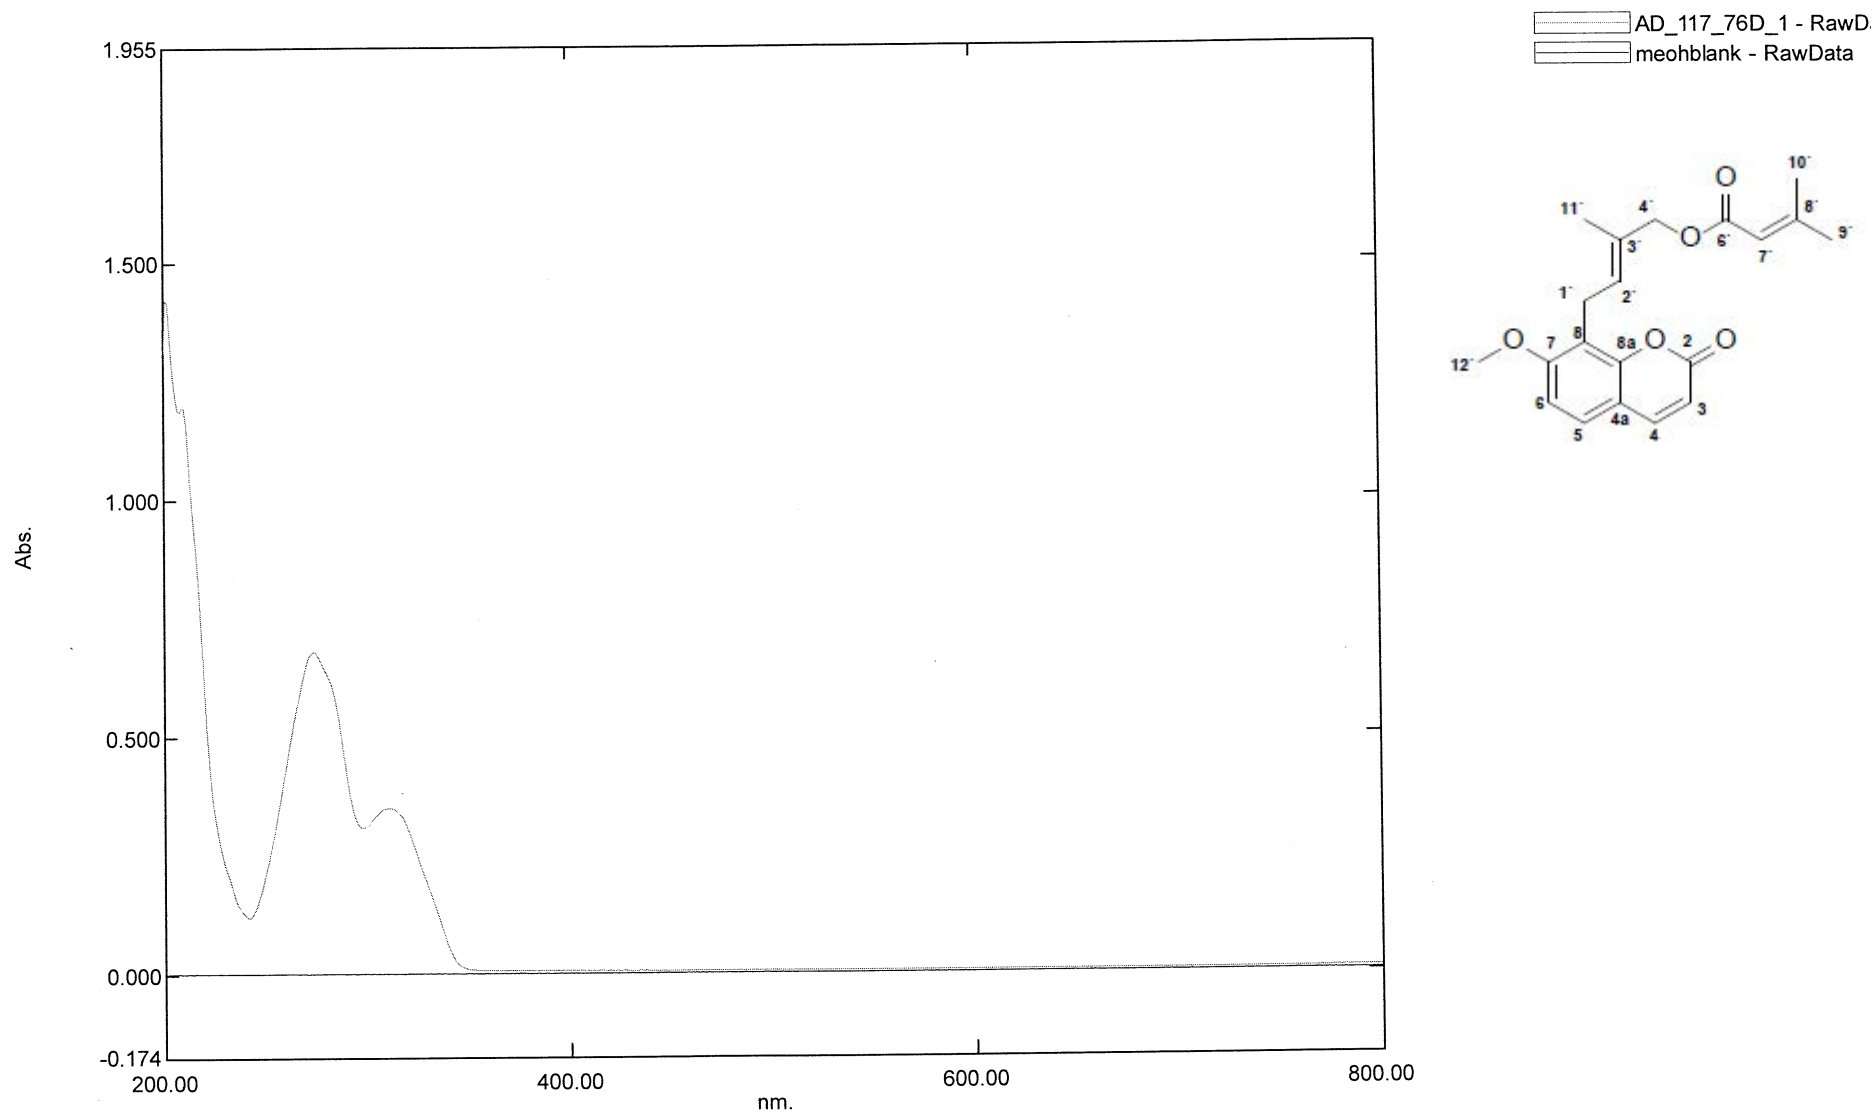

**Figure S11.**  $^1\text{H}$  NMR spectrum of **2** in  $\text{CDCl}_3$

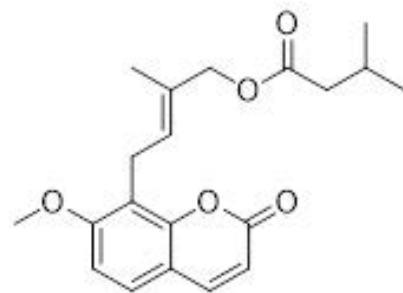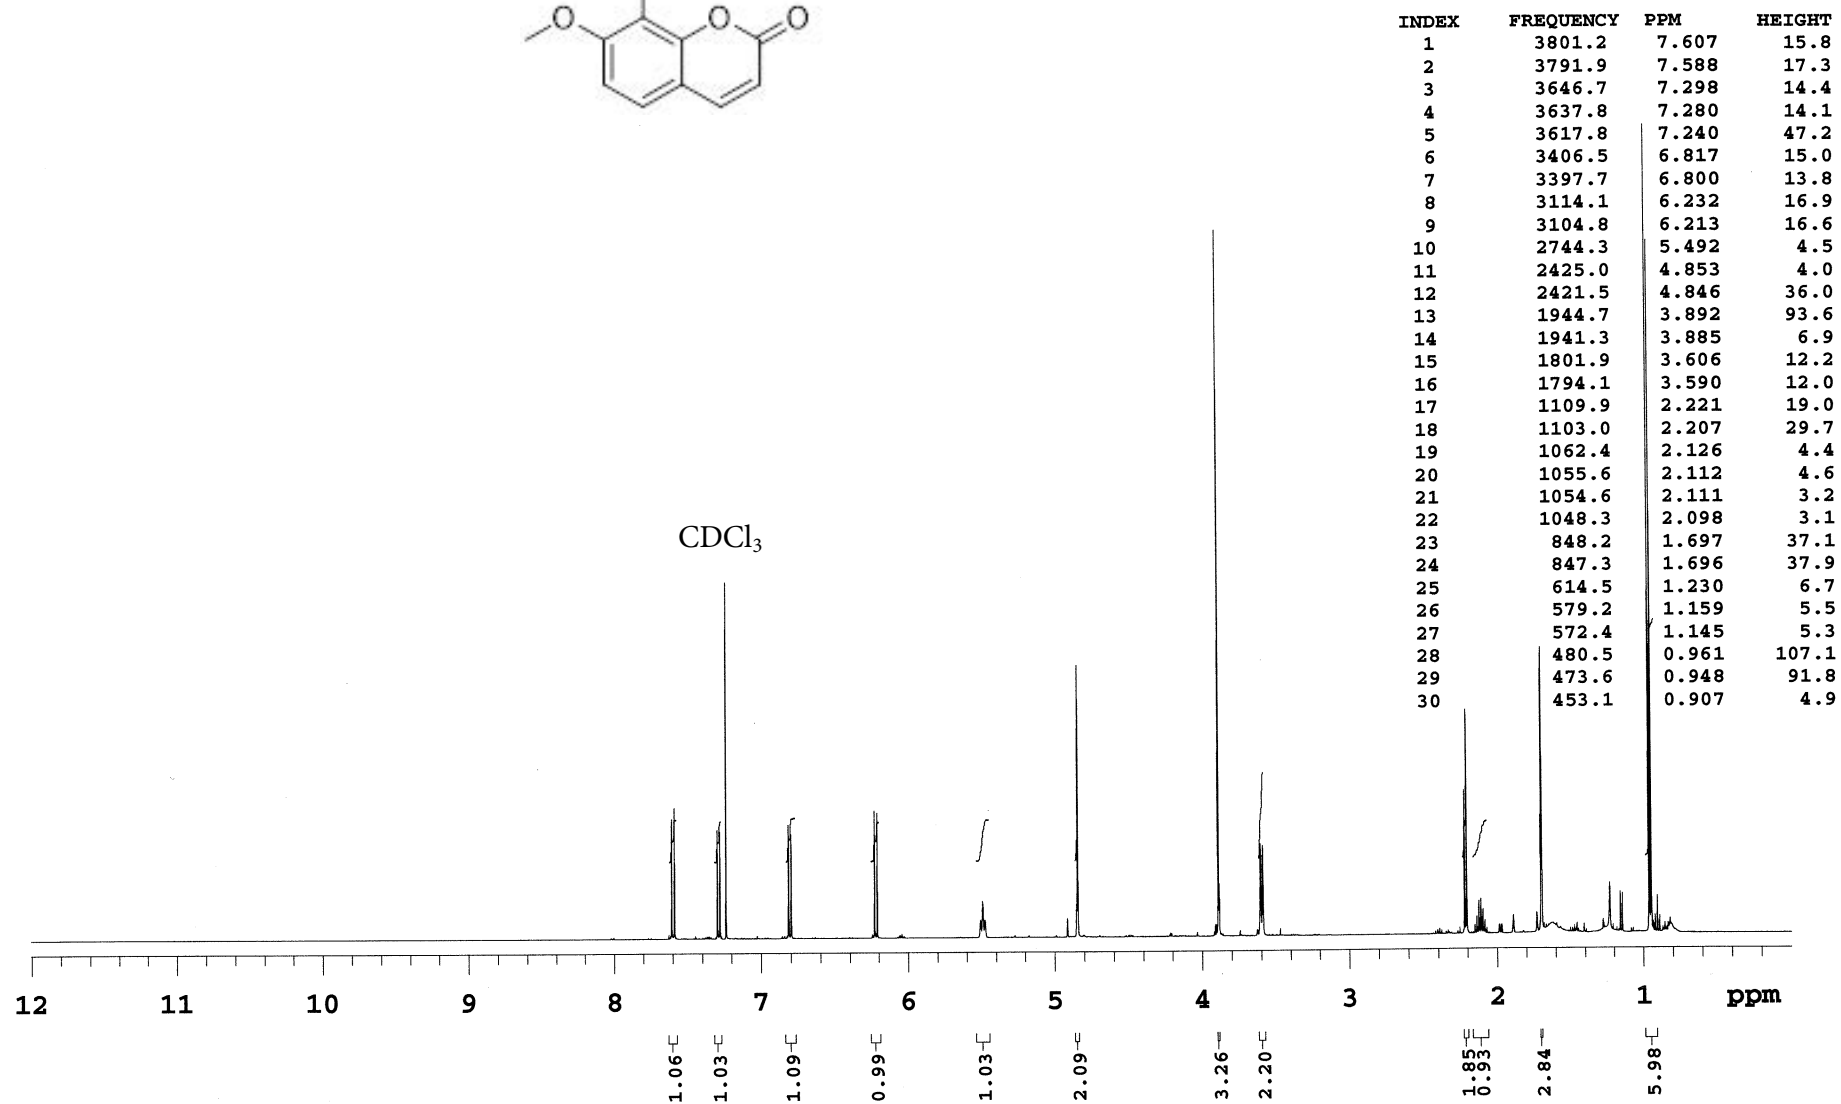

Figure S12.  $^{13}\text{C}$  NMR spectrum of **2** in  $\text{CDCl}_3$

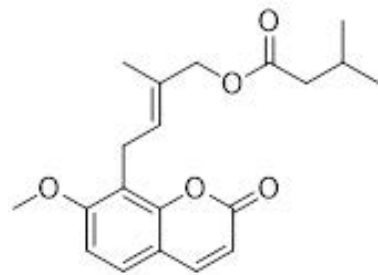

$\text{CDCl}_3$

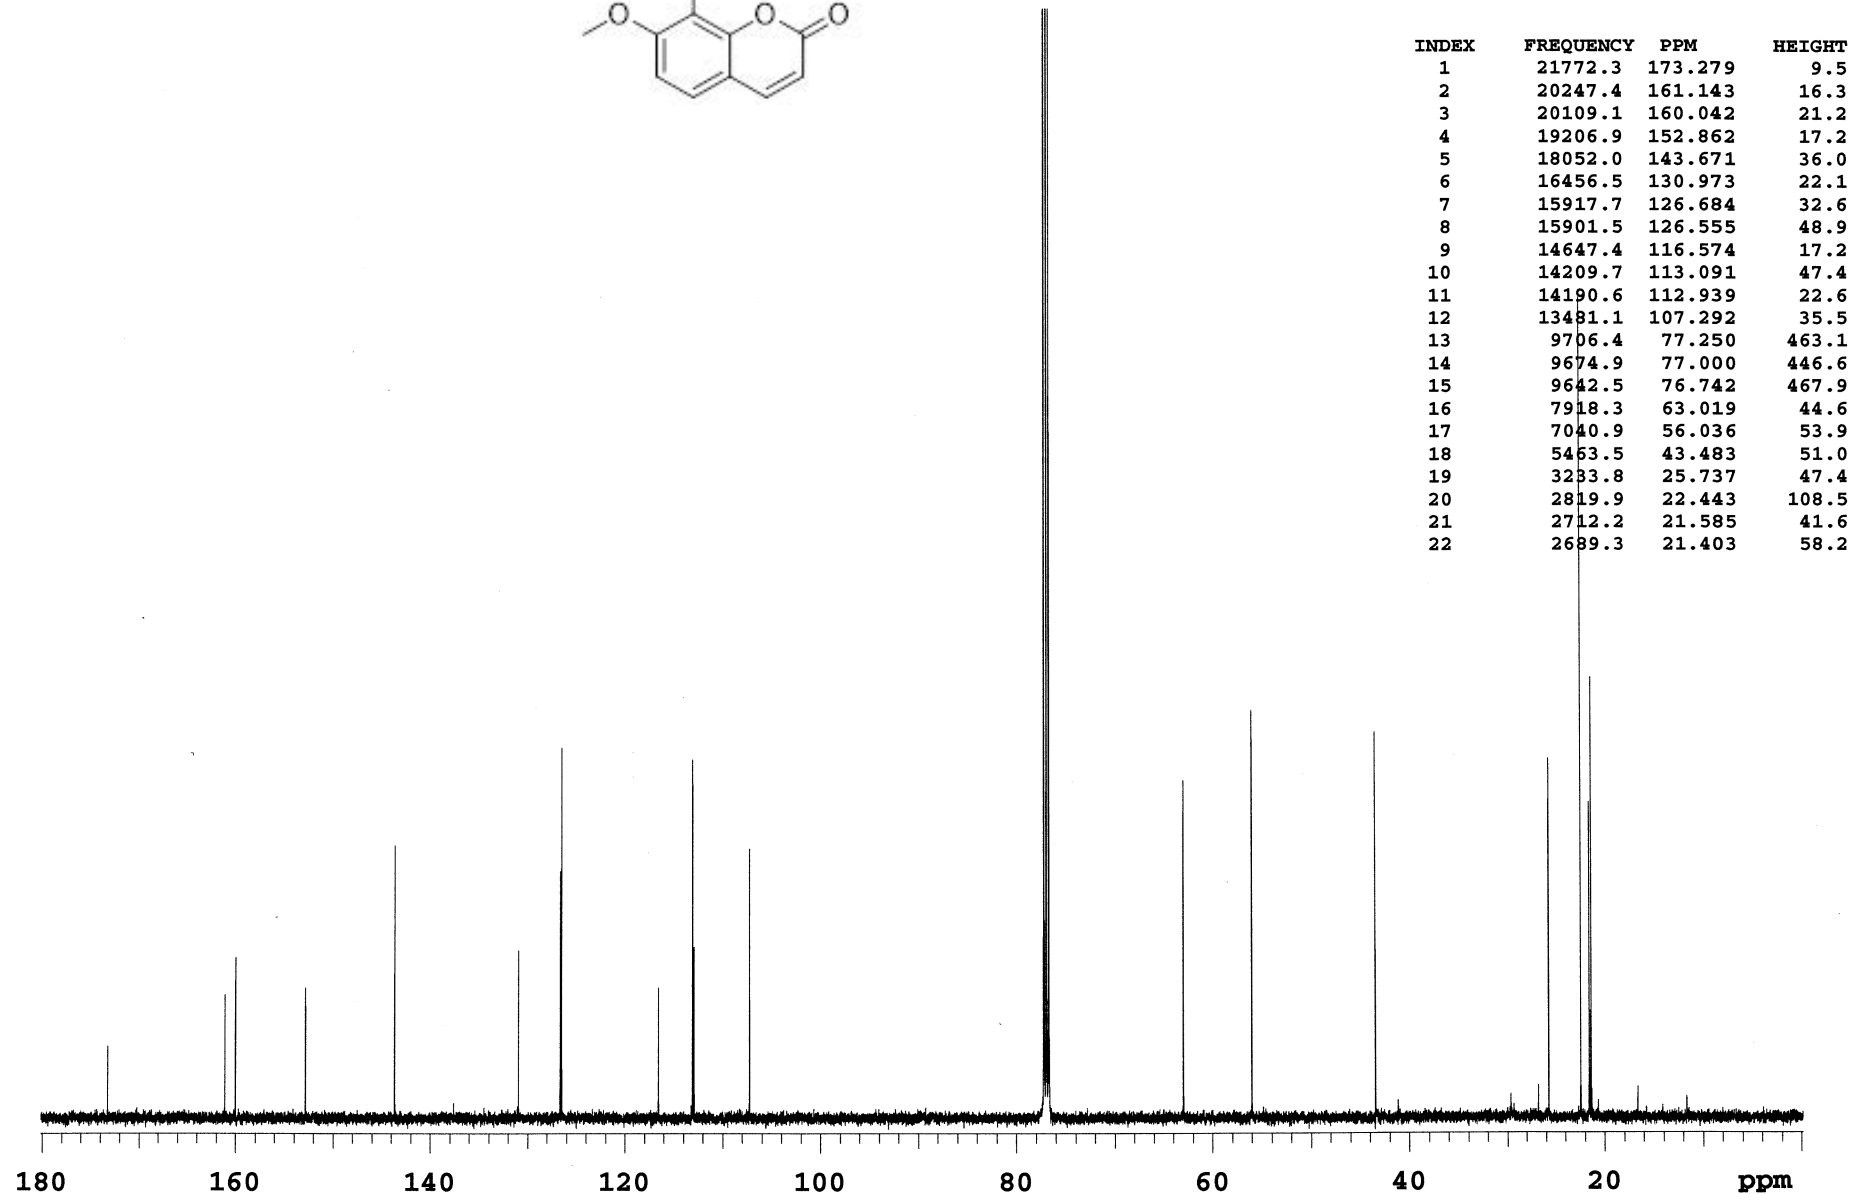

**Figure S13.** HMBC spectrum of **2** in CDCl<sub>3</sub>

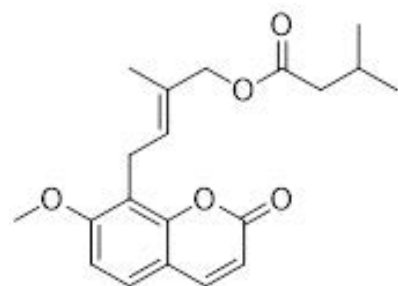

AD\_117\_76C

Sample Name AD\_117\_76C  
Date collected 2016-02-17

Pulse sequence gHMBCAD  
Solvent cdcl3

Temperature 25  
Spectrometer ormuzd-vnmrs500

Study owner amilad  
Operator amilad

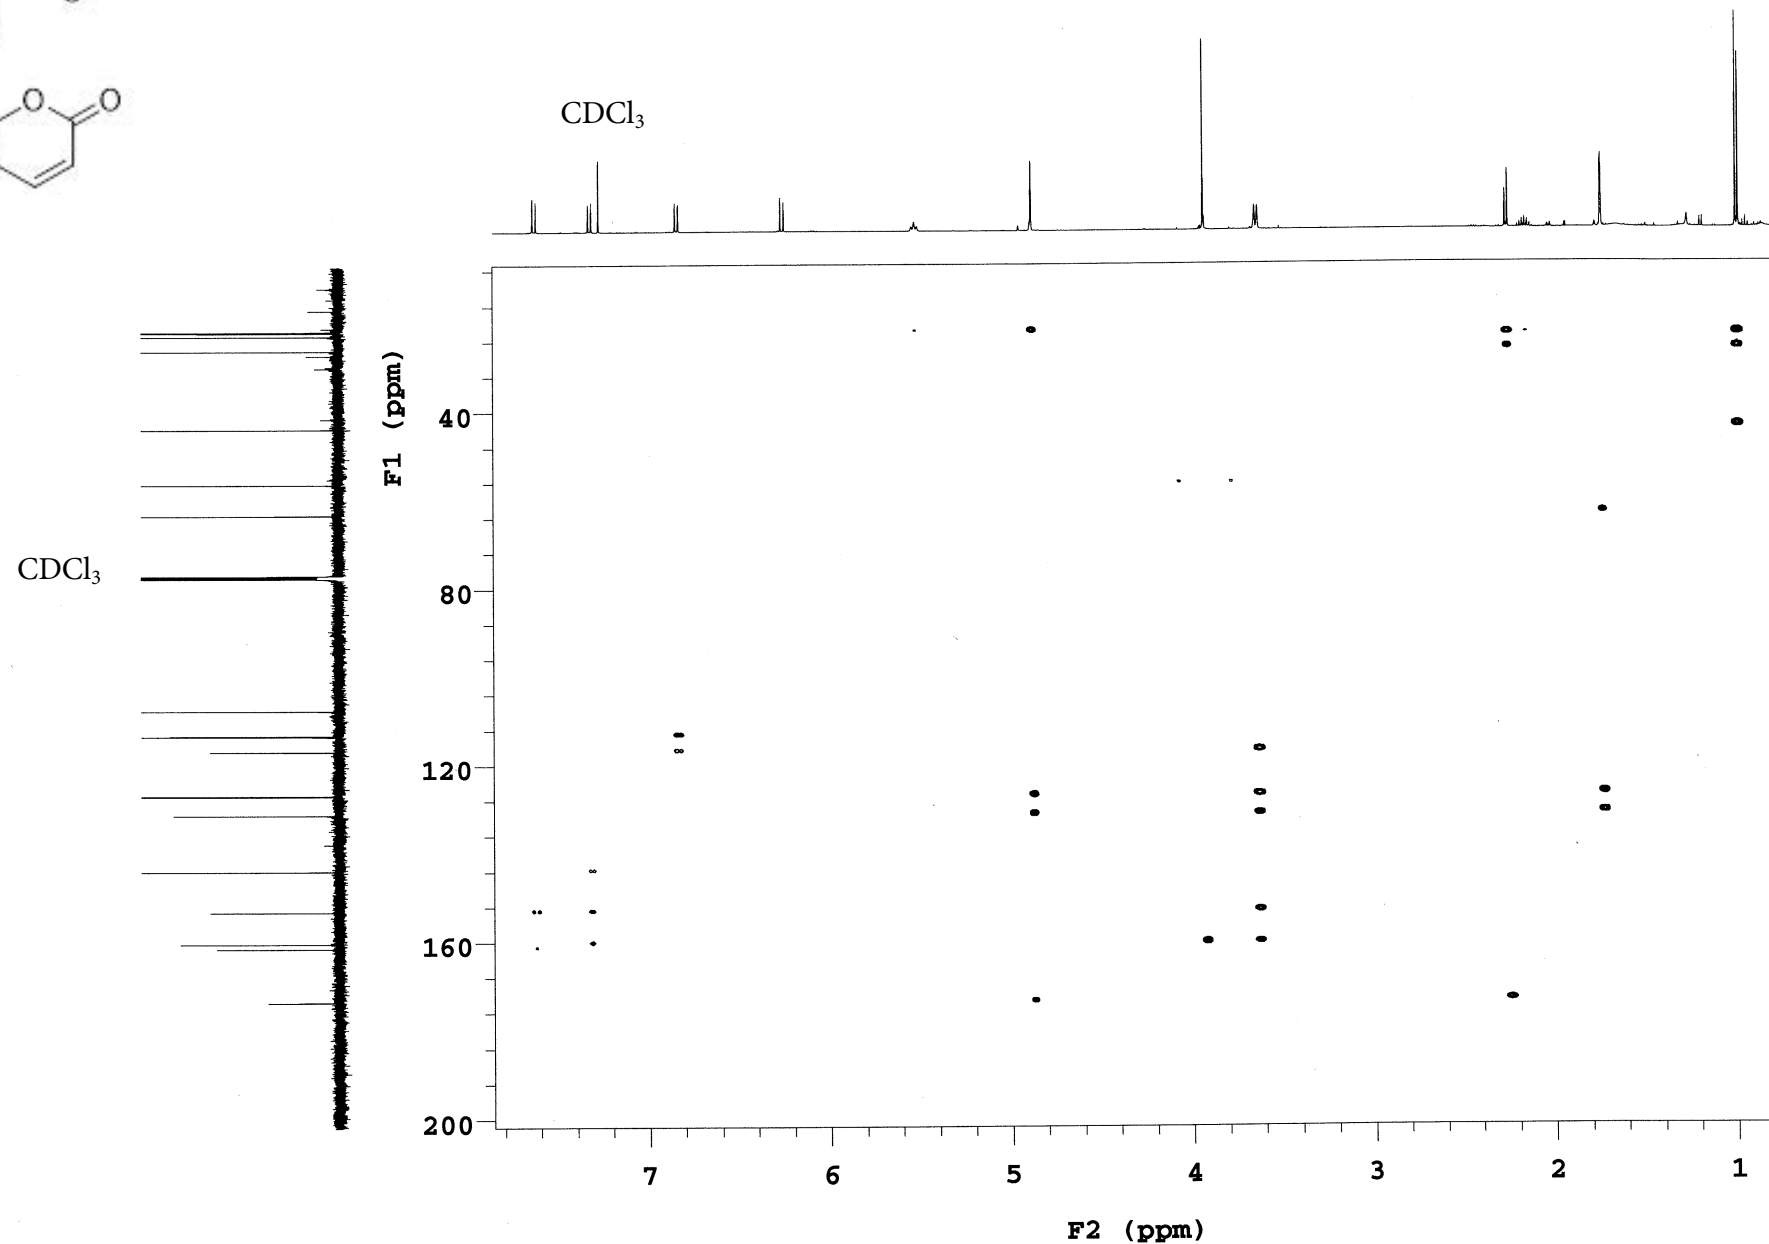

Figure S14. NOESY spectrum of **2** in CDCl<sub>3</sub> ( $\delta$ H = 4.84)

Sample Name:

AD\_117\_76C\_NOESY

Data Collected on:

ormuzd-vnmrs500

Archive directory:

/home/walkup/vnmrsys/data/amilad

Sample directory:

AD\_117\_76C\_NOESY\_20170511\_01

FidFile: AD\_117\_76C\_NOESY\_NOESY1D\_03

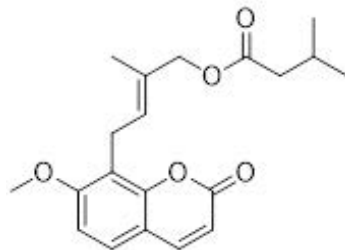

| INDEX | FREQUENCY | PPM   | HEIGHT |
|-------|-----------|-------|--------|
| 1     | 2763.5    | 5.530 | 35.8   |
| 2     | 2755.6    | 5.515 | 74.4   |
| 3     | 2747.8    | 5.497 | 36.0   |
| 4     | 859.5     | 5.487 | 36.0   |

Agilent Technologies

Pulse Sequence: NOESY1D

Solvent: cdcl3

Data collected on: May 11 2017

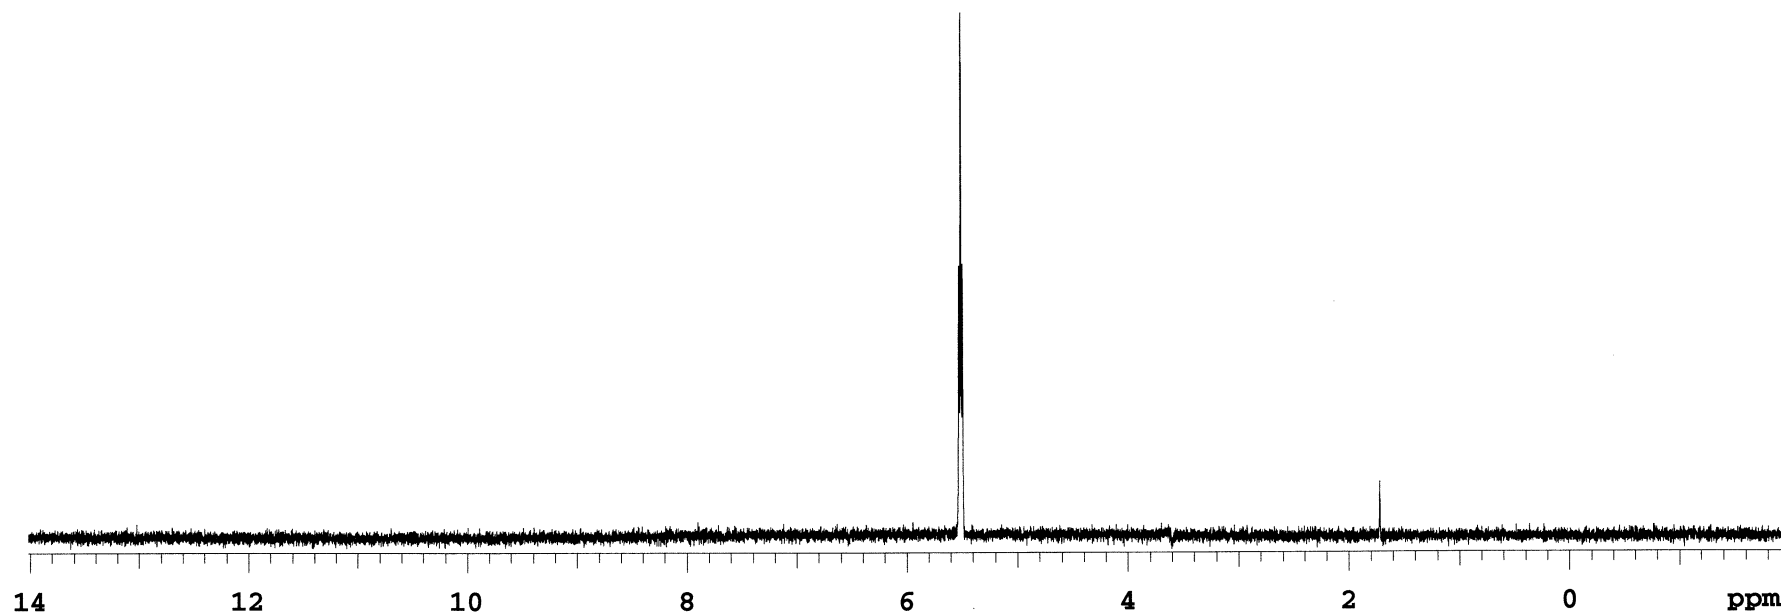



Figure S15. HR-ESITOFMS (positive) of 2

AD\_117\_76C

XS2\_121616\_009 20 (0.248) Cm (15:29)

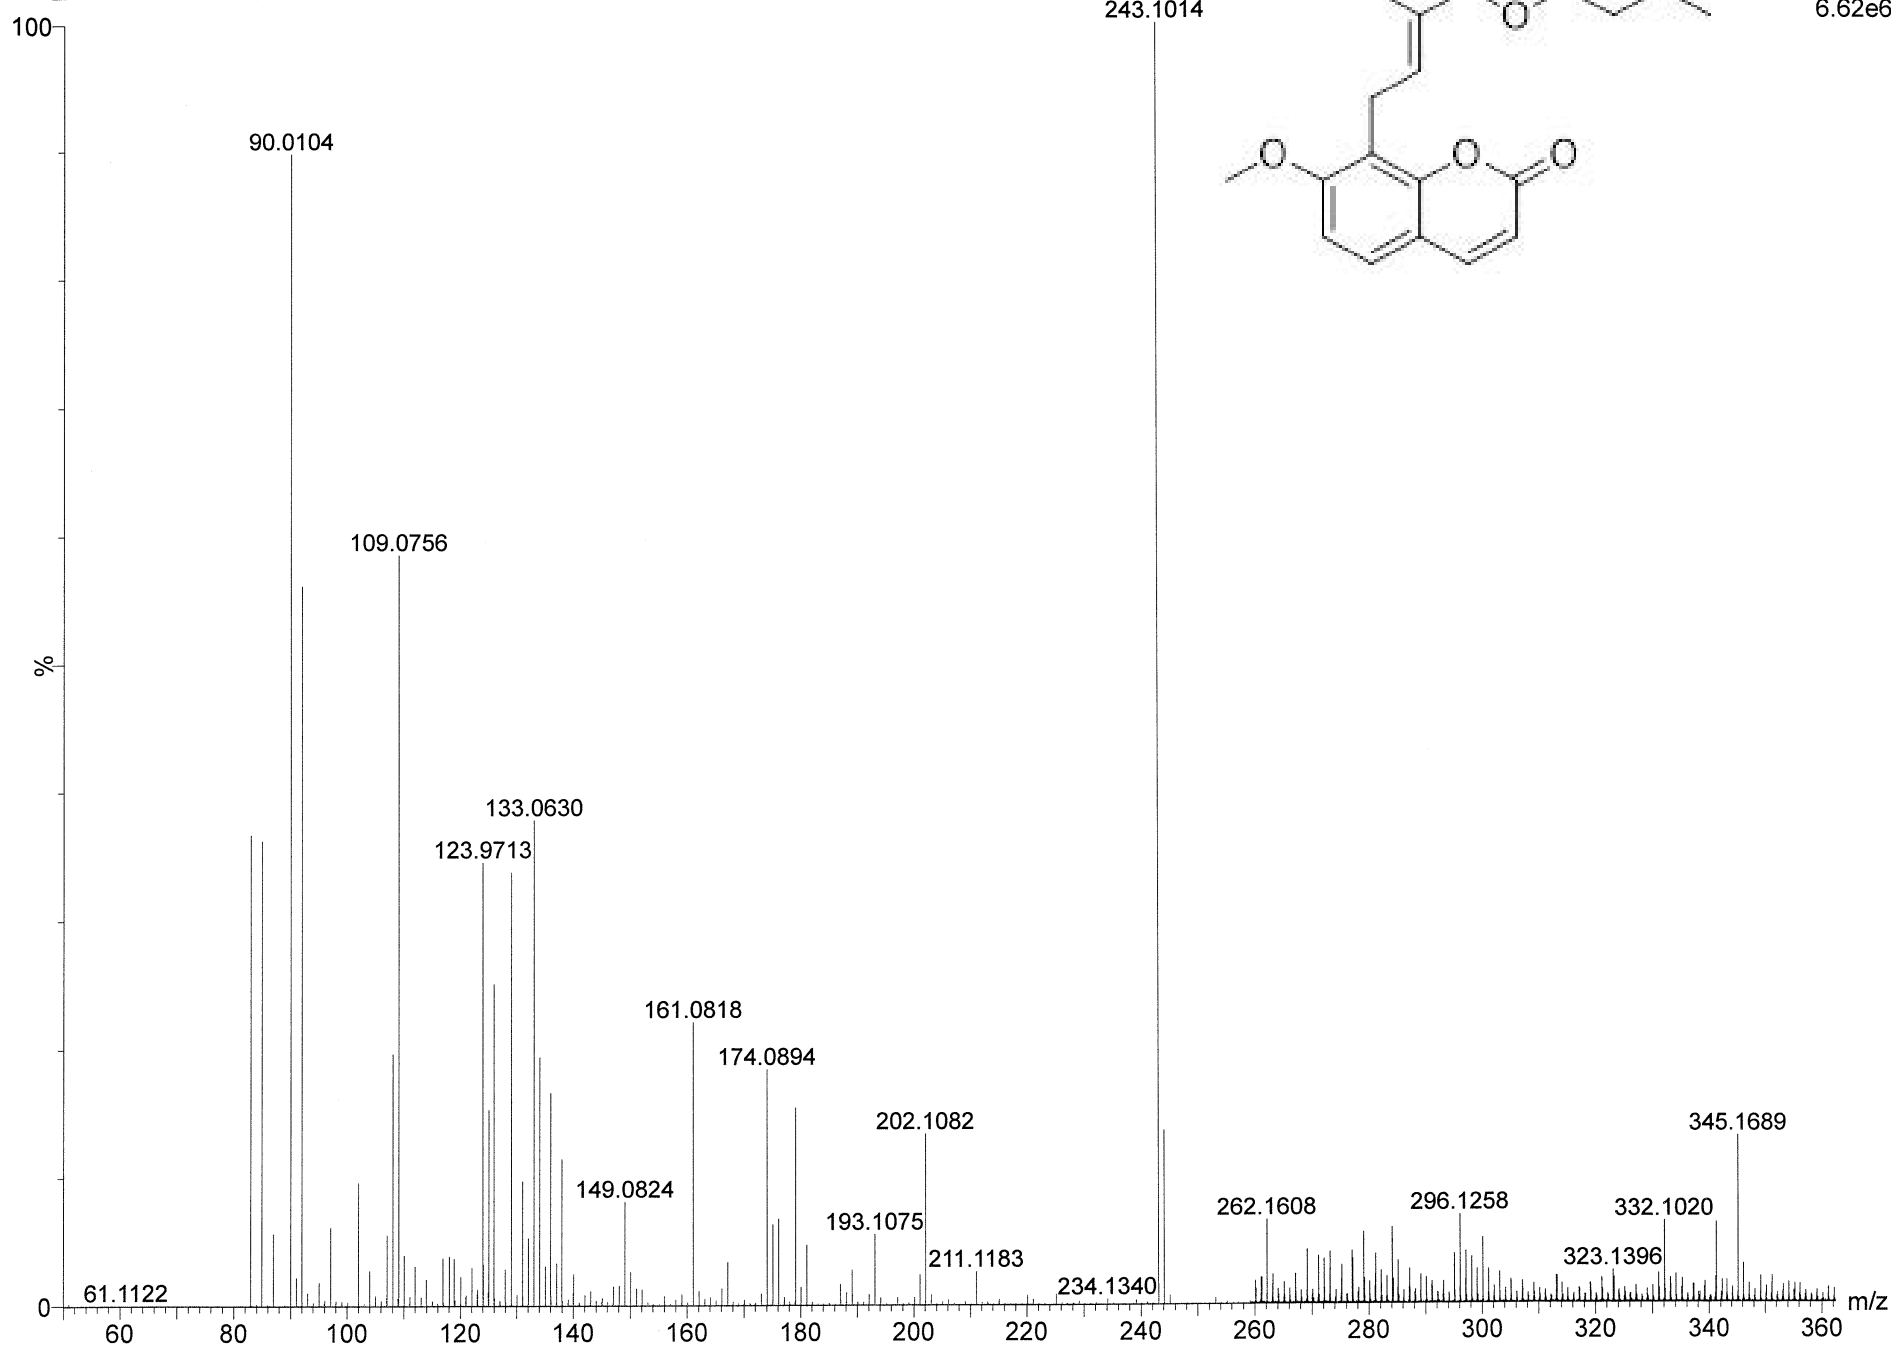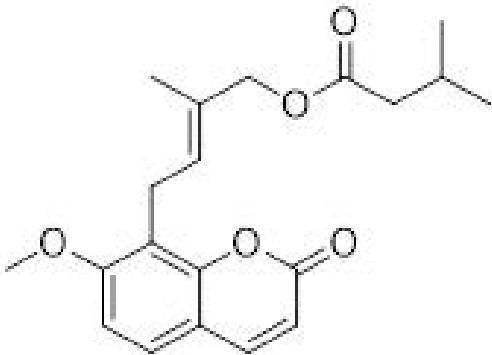

TOF MS AP+  
6.62e6

**Figure S16.** Elemental composition of **2** calculated by single mass analysis

## Elemental Composition Report

### Single Mass Analysis

Tolerance = 10.0 PPM / DBE: min = -1.5, max = 100.0

Element prediction: On (Carbon range  $\pm 5$ ) (Set  $0 < \text{Cl} < 9$ ,  $0 < \text{Br} < 9$  and  $0 < \text{S} < 7$  for

Number of isotope peaks used for i-FIT = 3

Monoisotopic Mass, Even Electron Ions

25 formula(e) evaluated with 1 results within limits (up to 50 closest results for each mass)

Elements Used:

C: 0-30 H: 0-50 O: 0-5

AD\_117\_76C

XS2\_121616\_009 22 (0.265) Cm (22:24)

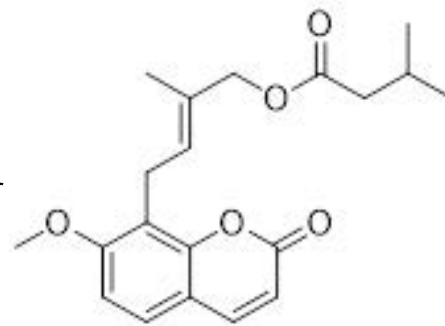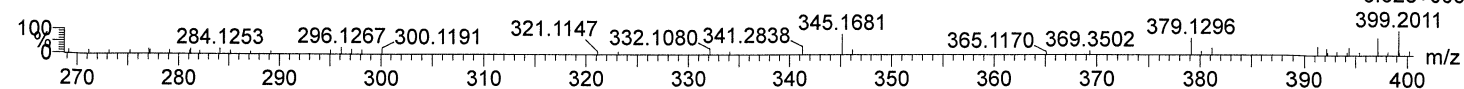

Minimum: -1.5  
Maximum: 10.0 10.0 100.0

| Mass     | Calc. Mass | mDa  | PPM  | DBE | i-FIT | Norm | Conf(%) | Formula    |
|----------|------------|------|------|-----|-------|------|---------|------------|
| 345.1689 | 345.1702   | -1.3 | -3.8 | 8.5 | 25.0  | n/a  | n/a     | C20 H25 O5 |

Figure S17. IR spectrum of 2 in KBr

Sat Feb 04 00:55:49:95 2017

02/117/76C

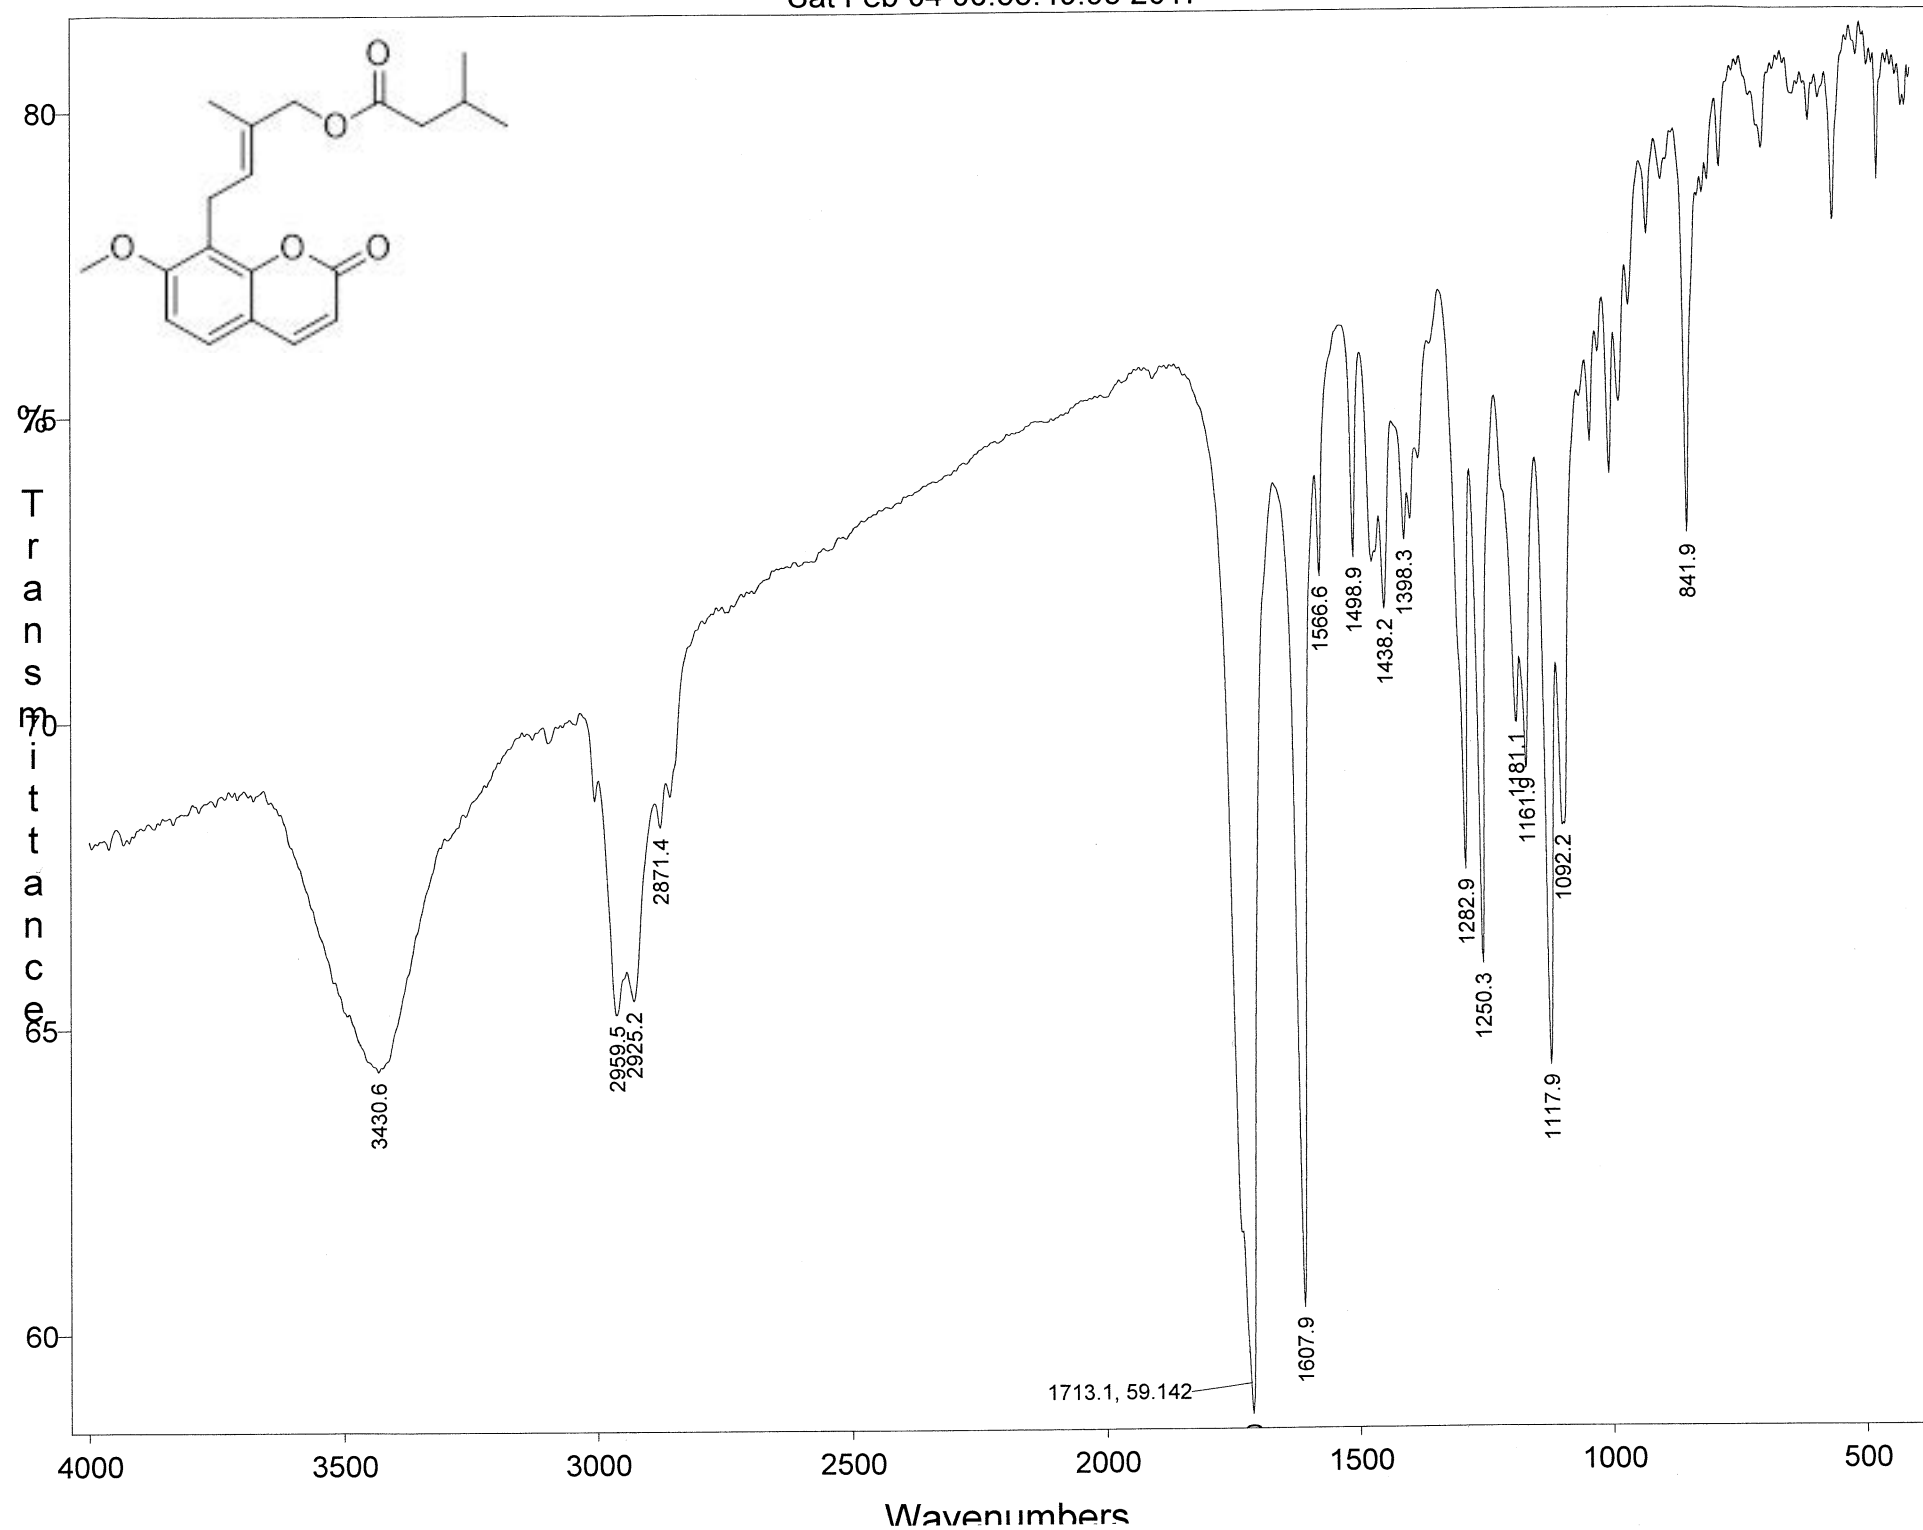

Figure S18. UV/Vis spectrum of 2 in methanol

# Overlay Spectrum Graph Report

02/03/2017 12:27:48 PM

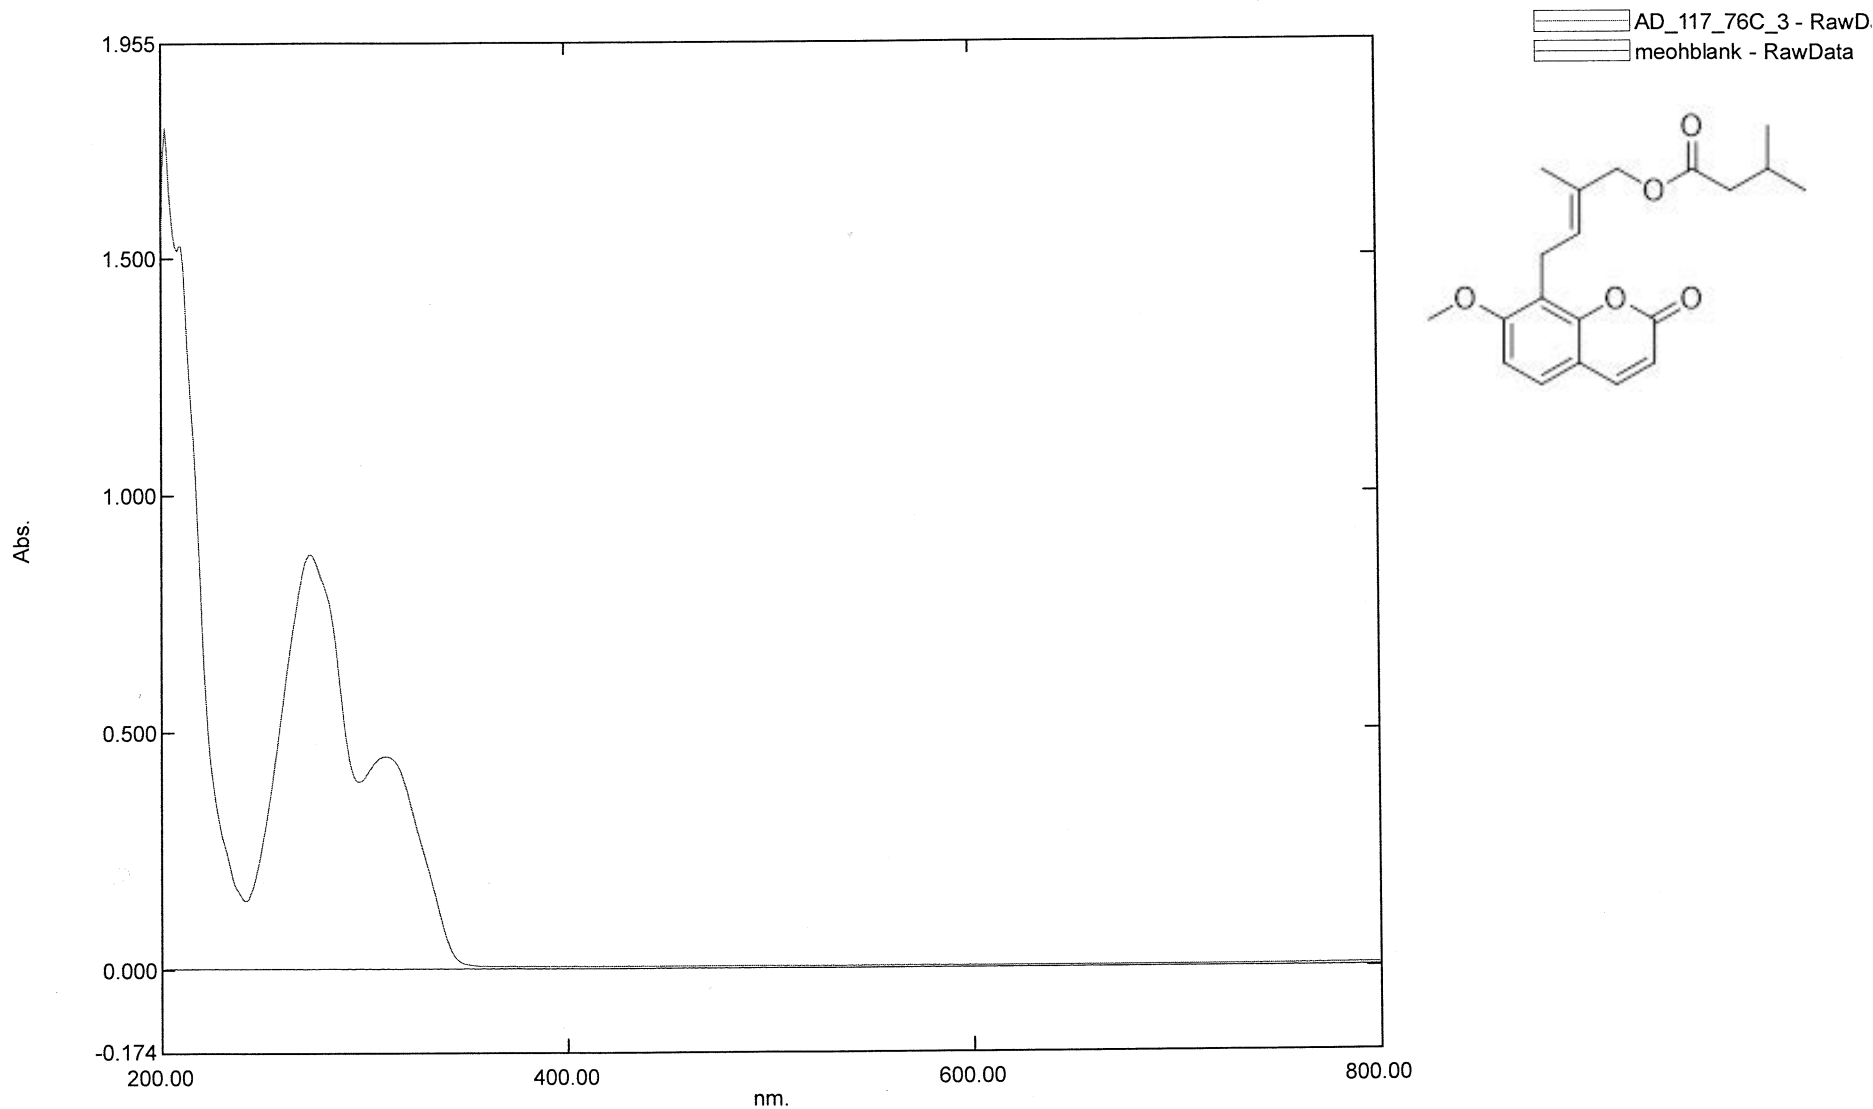

**Figure S19.**  $^1\text{H}$  NMR spectrum of **3** in  $\text{CDCl}_3$

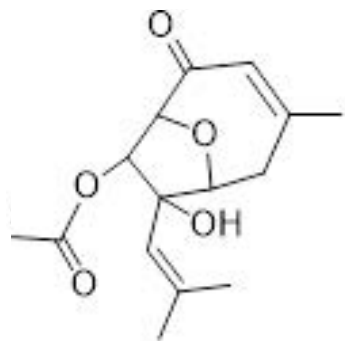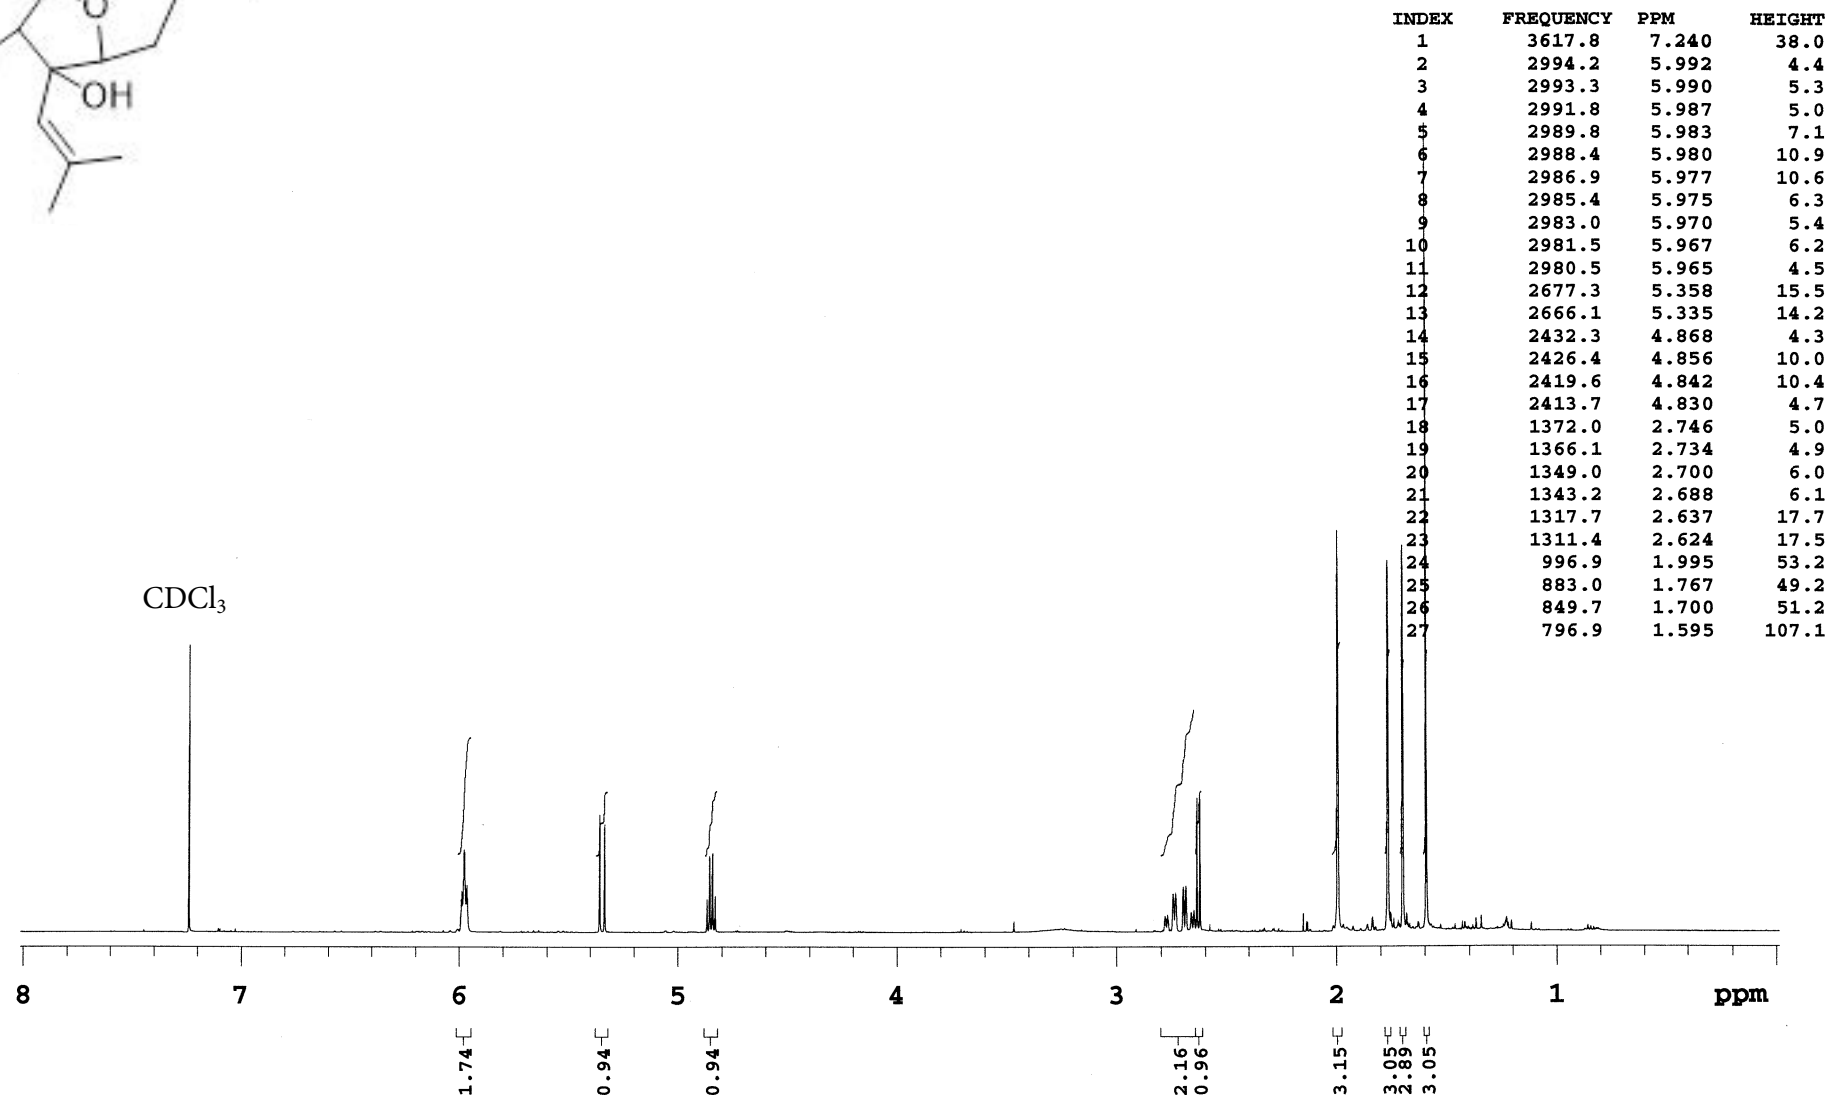

**Figure S20.**  $^{13}\text{C}$  NMR spectrum of **3** in  $\text{CDCl}_3$

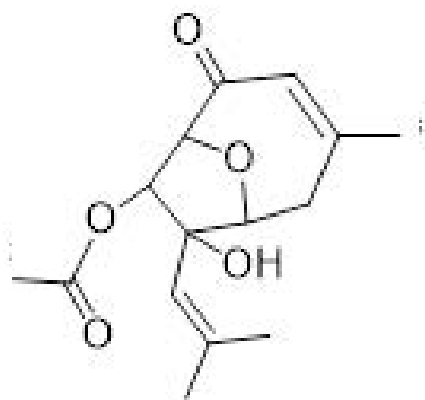

$\text{CDCl}_3$

| INDEX | FREQUENCY | PPM     | HEIGHT |
|-------|-----------|---------|--------|
| 1     | 24746.0   | 196.865 | 21.8   |
| 2     | 20126.4   | 160.114 | 21.8   |
| 3     | 19880.4   | 158.157 | 33.6   |
| 4     | 16669.4   | 132.612 | 27.2   |
| 5     | 15989.4   | 127.202 | 48.7   |
| 6     | 14794.4   | 117.696 | 78.0   |
| 7     | 11856.2   | 94.321  | 73.1   |
| 8     | 9875.4    | 78.563  | 53.4   |
| 9     | 9710.4    | 77.250  | 376.0  |
| 10    | 9704.7    | 77.205  | 22.0   |
| 11    | 9678.9    | 77.000  | 396.6  |
| 12    | 9646.5    | 76.742  | 380.8  |
| 13    | 9567.3    | 76.112  | 81.8   |
| 14    | 6729.2    | 53.534  | 73.7   |
| 15    | 4384.1    | 34.878  | 77.6   |
| 16    | 3440.0    | 27.367  | 55.9   |
| 17    | 3274.1    | 26.046  | 77.0   |
| 18    | 3095.7    | 24.628  | 68.8   |
| 19    | 2286.0    | 18.186  | 68.4   |

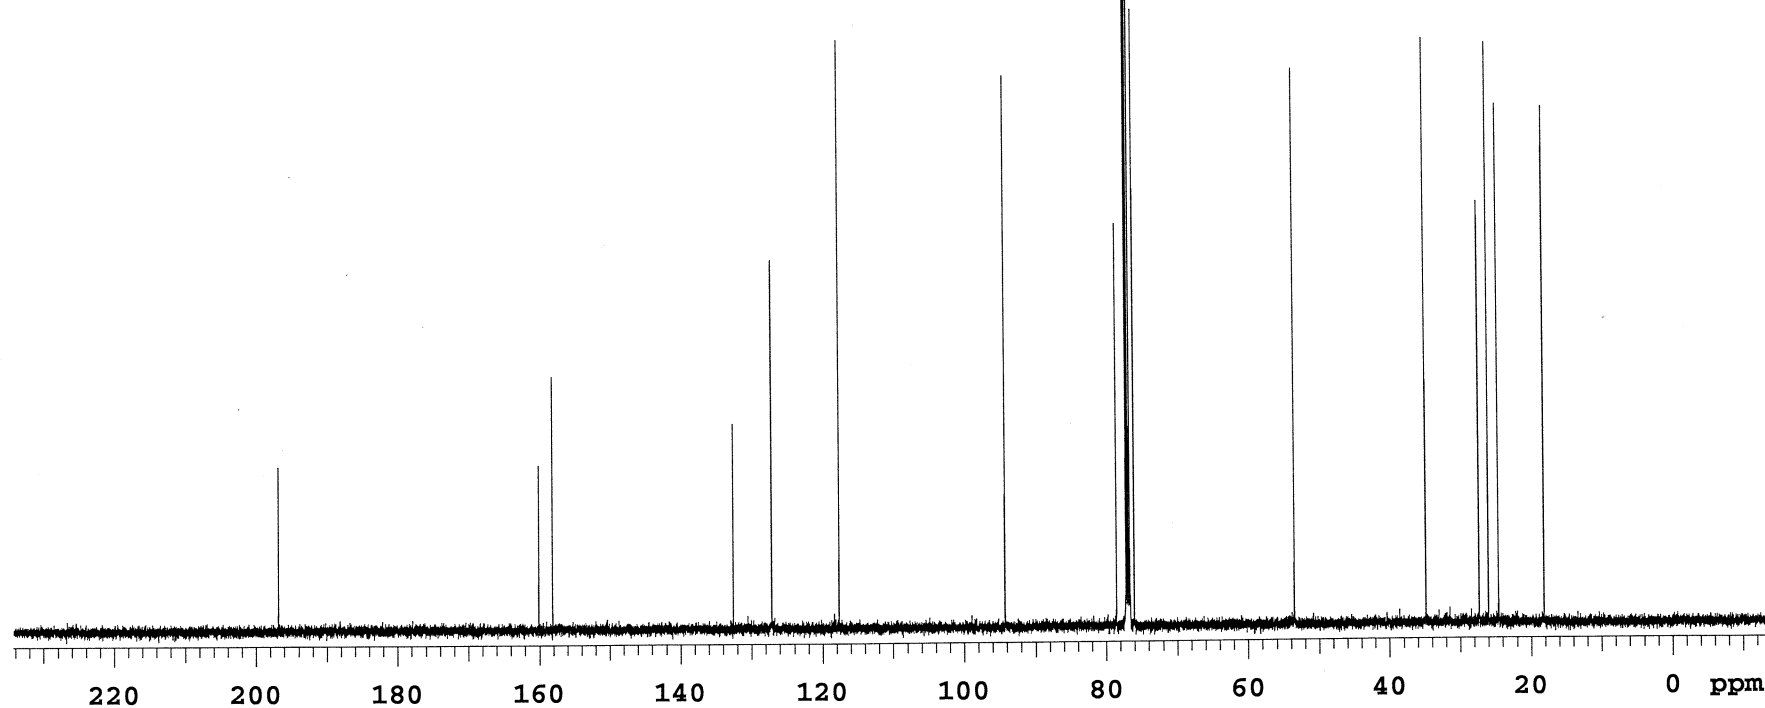

Figure S21. DEPT spectrum of **3** in CDCl<sub>3</sub>

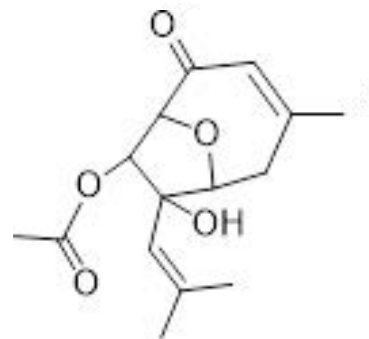

CH<sub>3</sub> carbons

CH<sub>2</sub> carbons

CH carbons

quaternary carbons

AD\_117\_73C

Sample Name AD\_117\_73C  
Date collected 2016-01-24

Pulse sequence DEPT  
Solvent cdcl3

Temperature 25  
Spectrometer agilentNMR-inova500

Study owner amilad  
Operator process

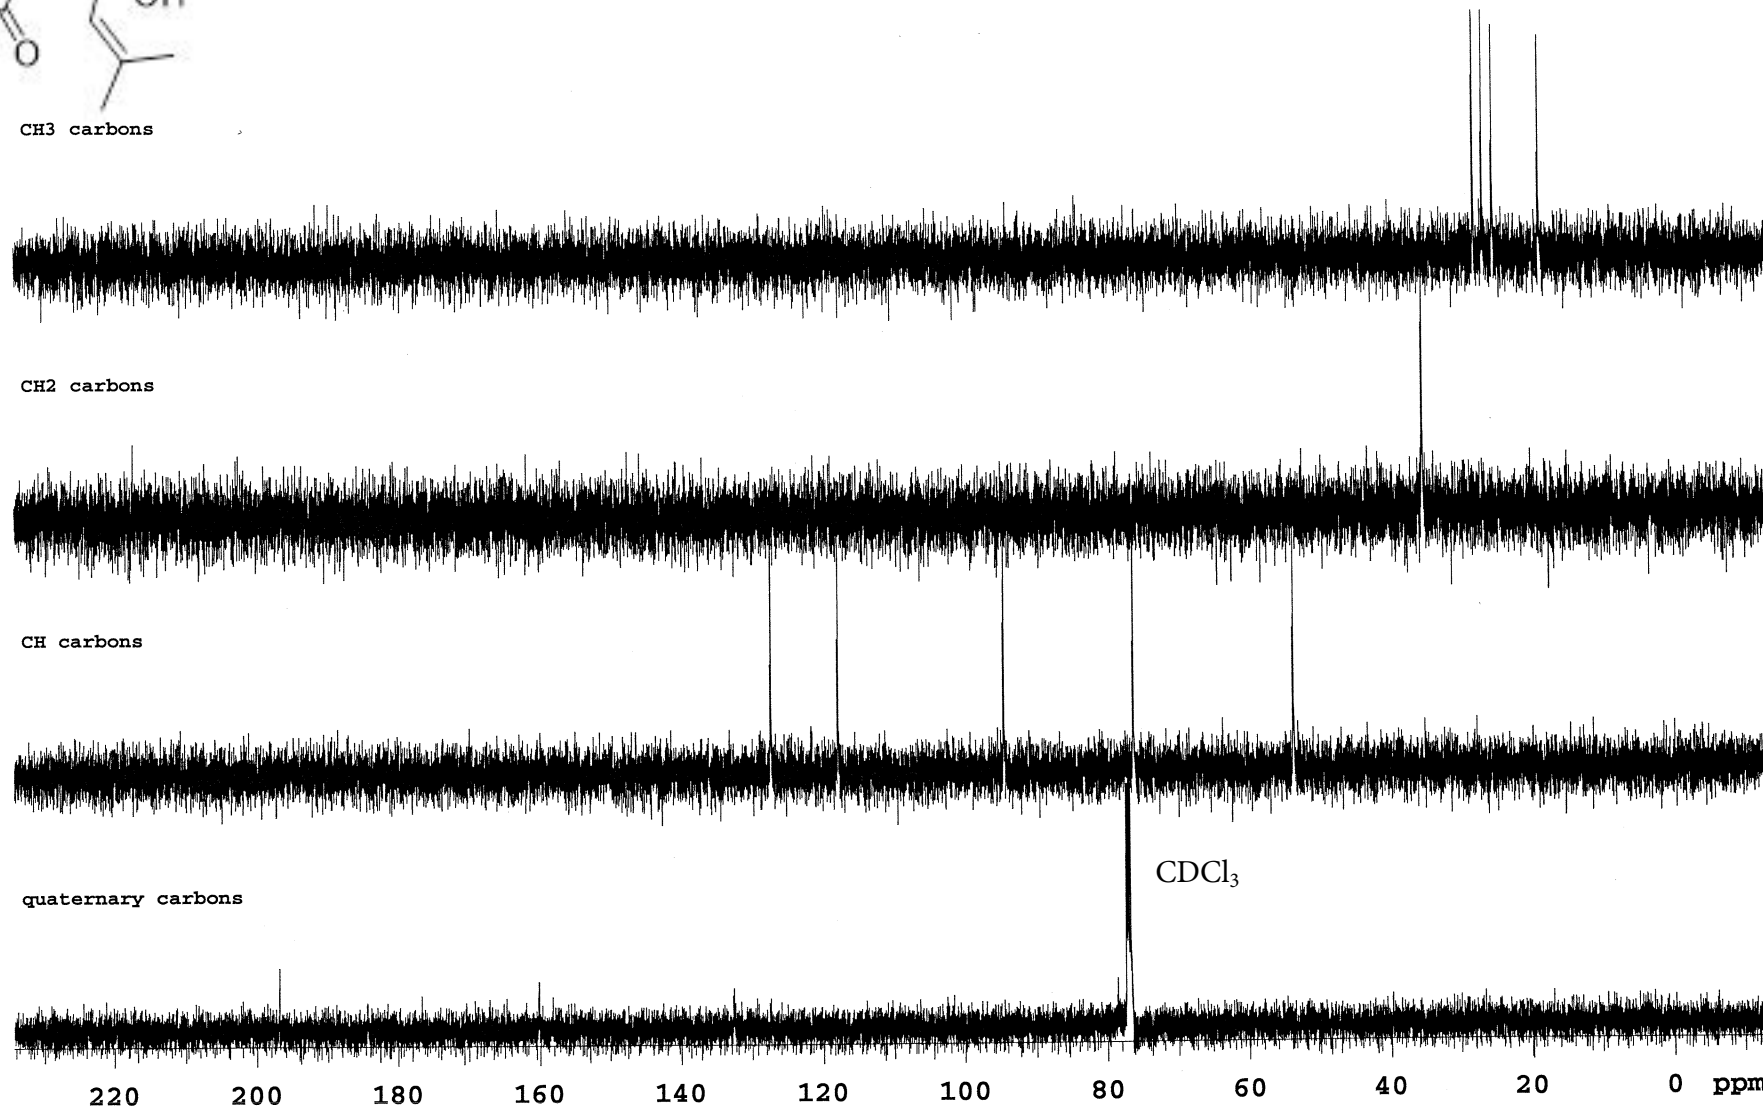

Figure S22. HSQC spectrum of **3** in CDCl<sub>3</sub>

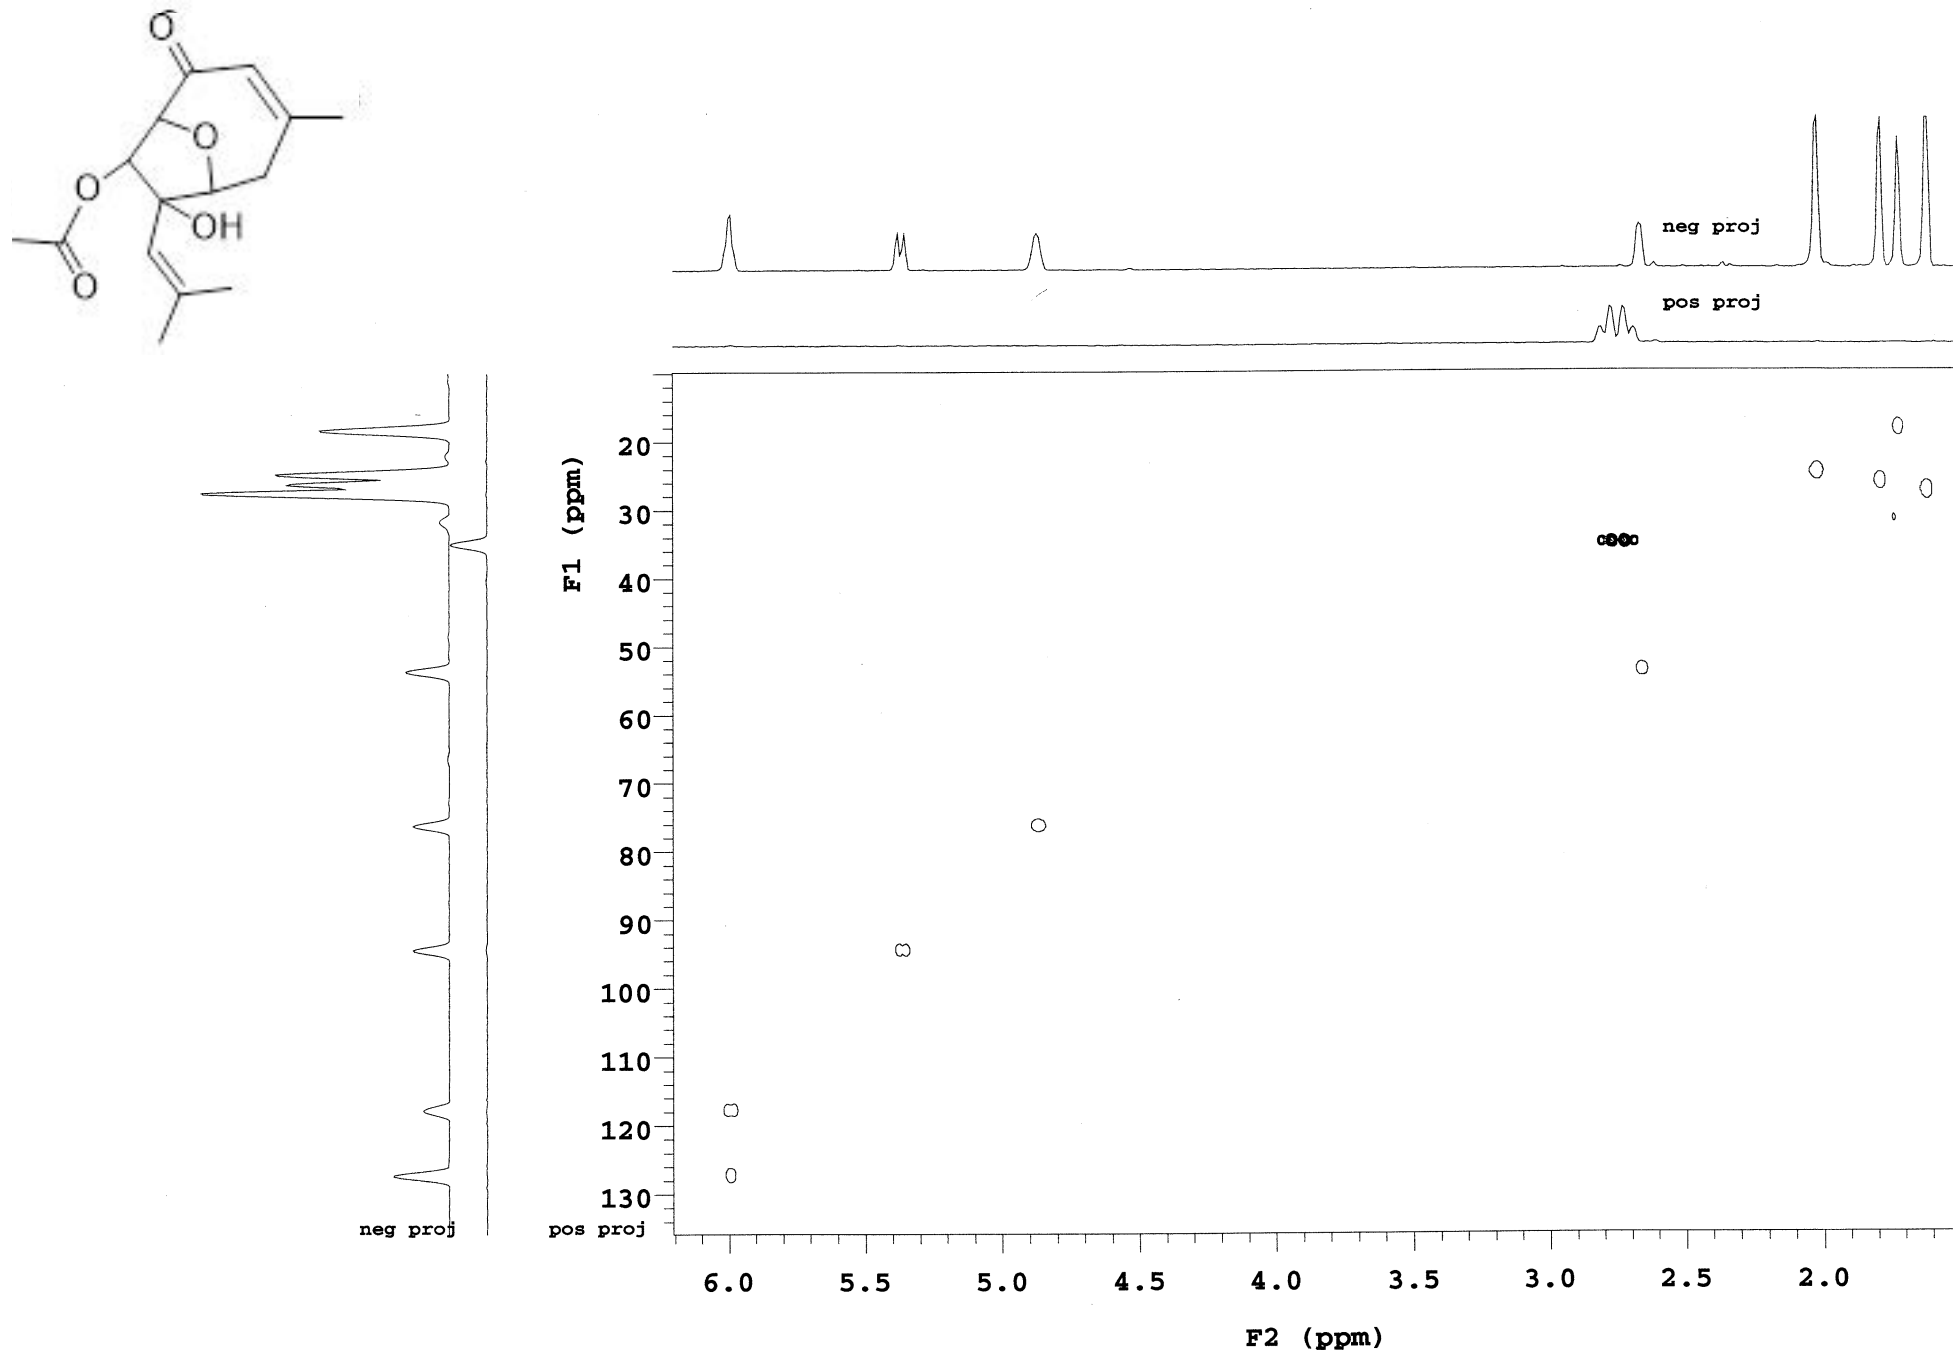



**Figure S23.** HMBC spectrum of **3** in CDCl<sub>3</sub>

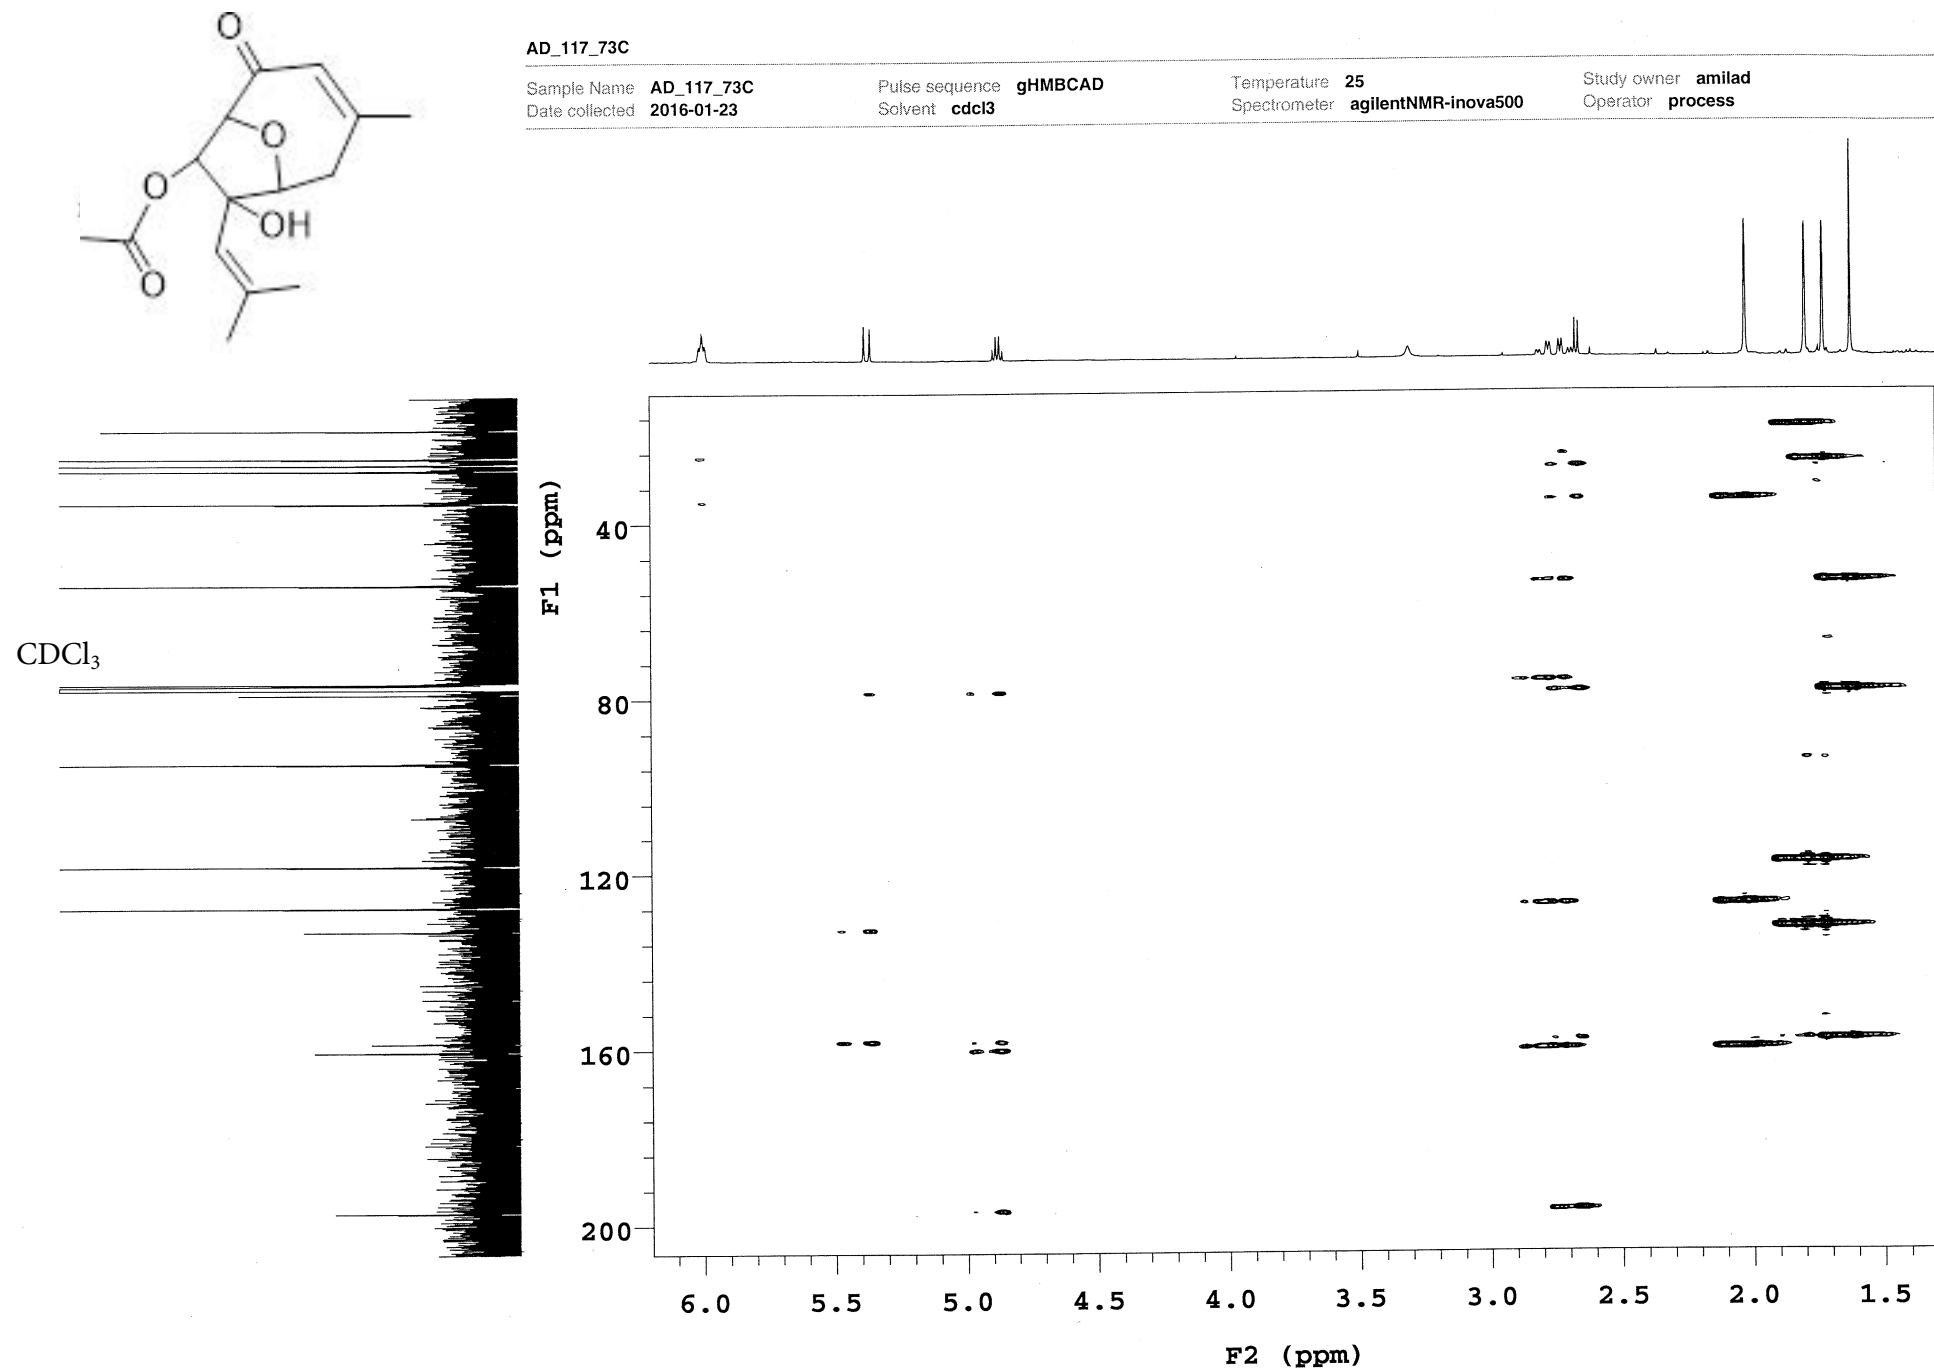

Figure S24. <sup>1</sup>H-<sup>1</sup>H COSY spectrum of 3 in CDCl<sub>3</sub>

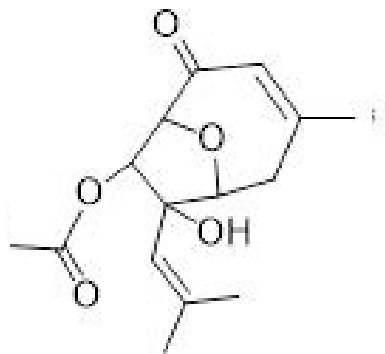

AD\_117\_73C

|                |            |                |       |              |                 |             |        |
|----------------|------------|----------------|-------|--------------|-----------------|-------------|--------|
| Sample Name    | AD_117_73C | Pulse sequence | gCOSY | Temperature  | 25              | Study owner | amilad |
| Date collected | 2016-02-12 | Solvent        | cdcl3 | Spectrometer | ormuzd-vnmrs500 | Operator    | amilad |

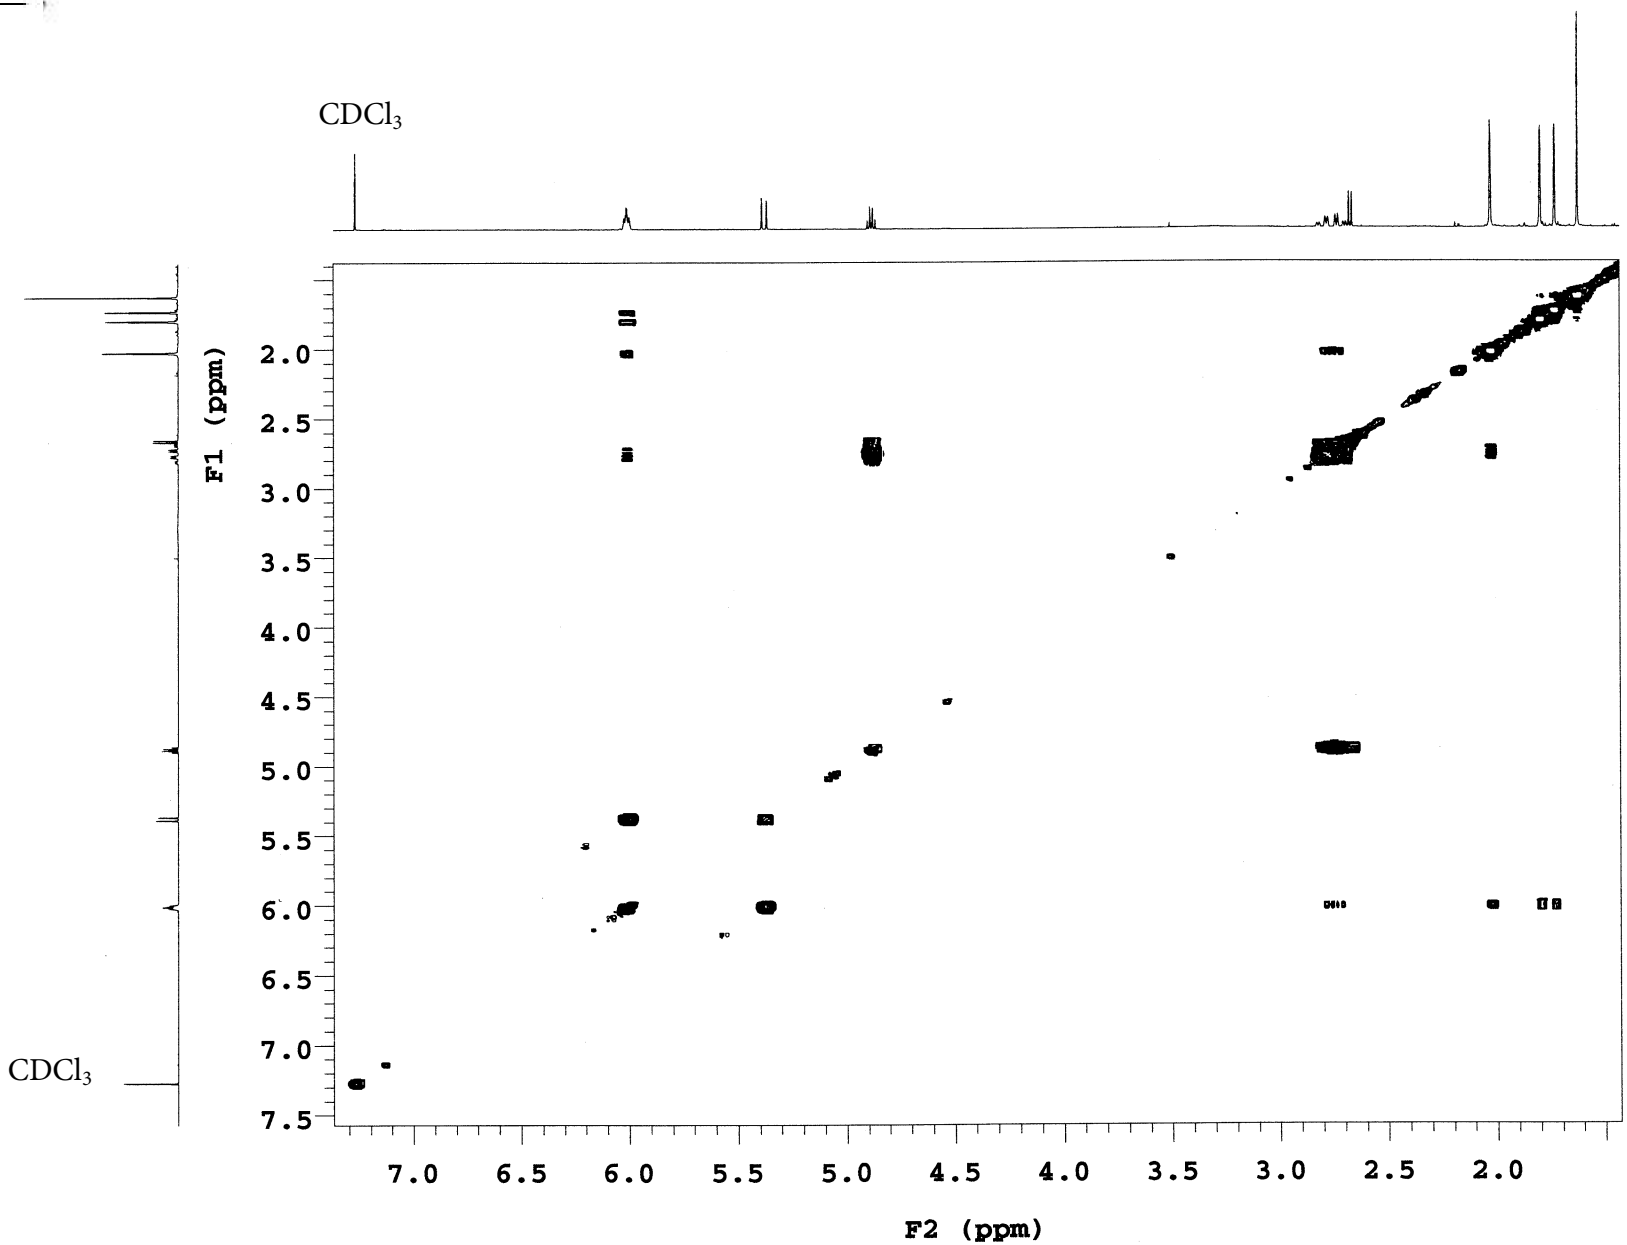

CC(=O)OC1C(C)C(O)C2C(C1)C(=O)C=C(C)C2

Sample Name **AD\_117\_73C**  
Date collected **2016-12-15**

Pulse sequence **NOESY**  
Solvent **cdcl3**

Temperature 25  
Spectrometer ormuzd-vnmrs500

Study owner **amilad**  
Operator **amilad**

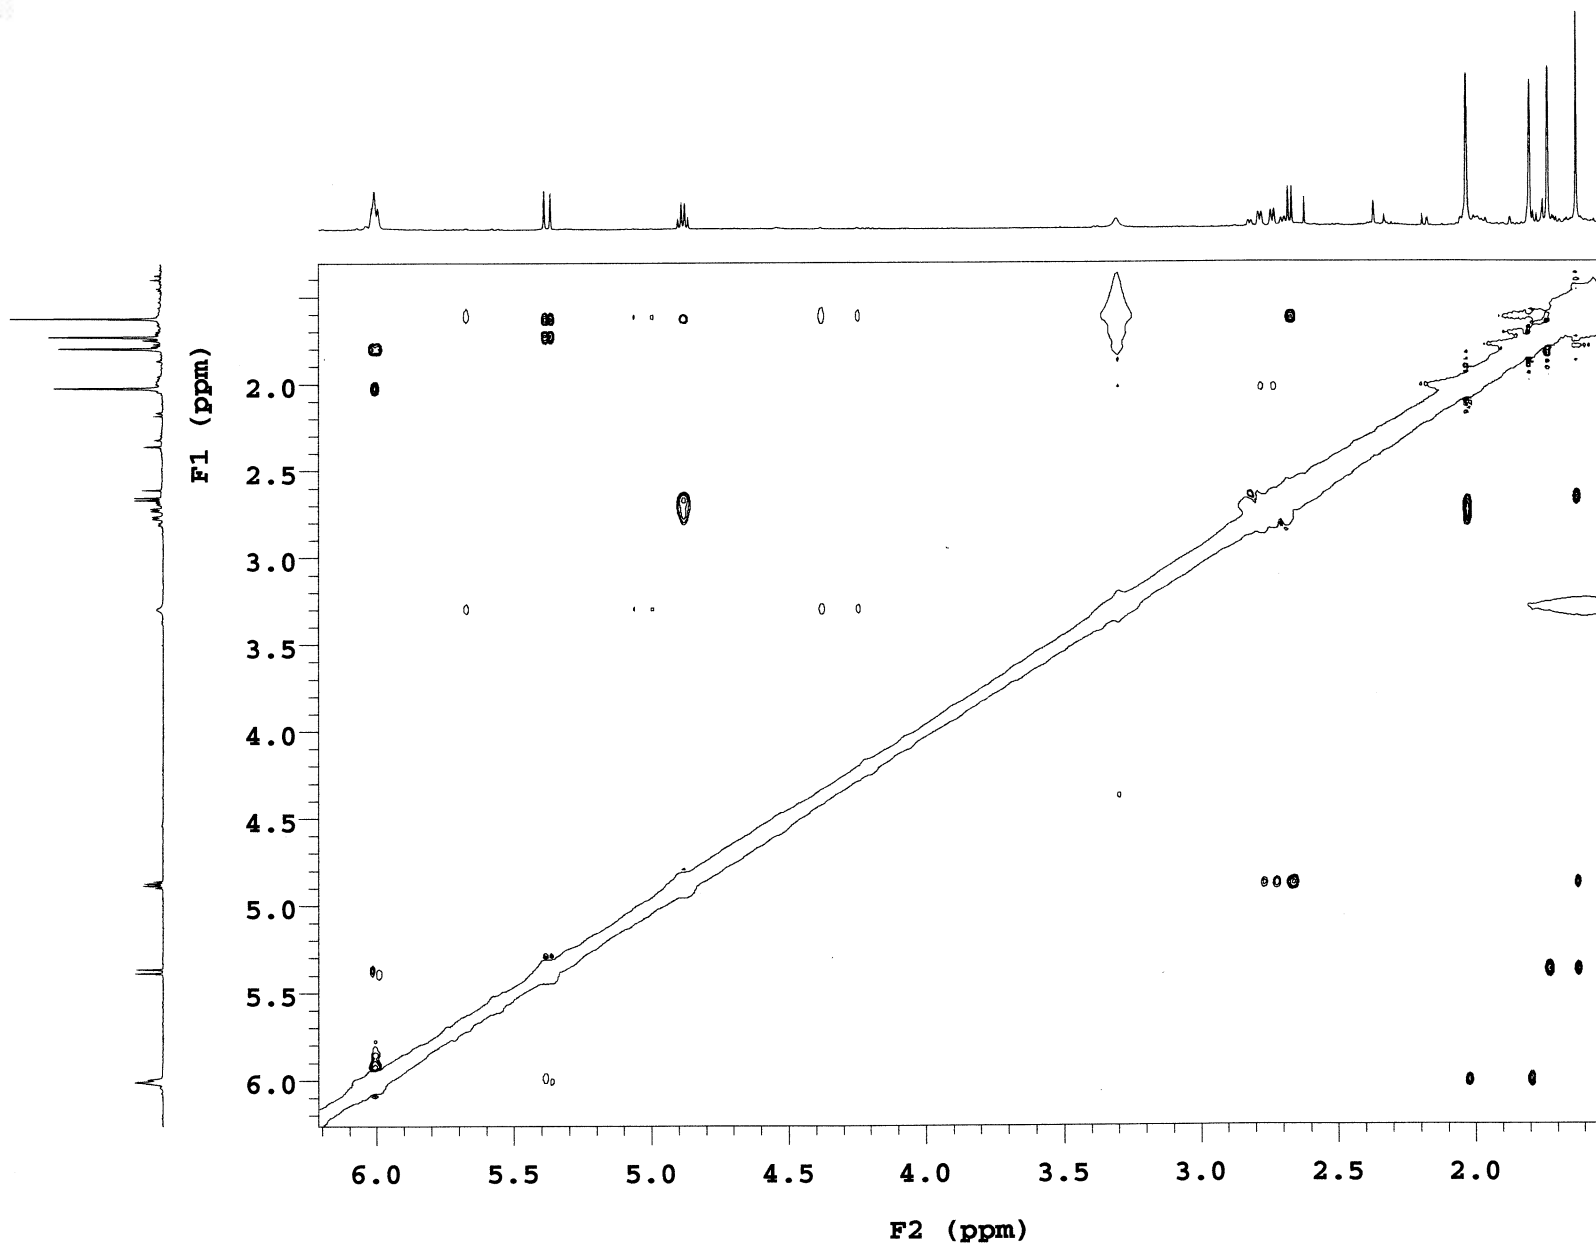

Figure S26. HR-ESITOFMS (positive) of 3

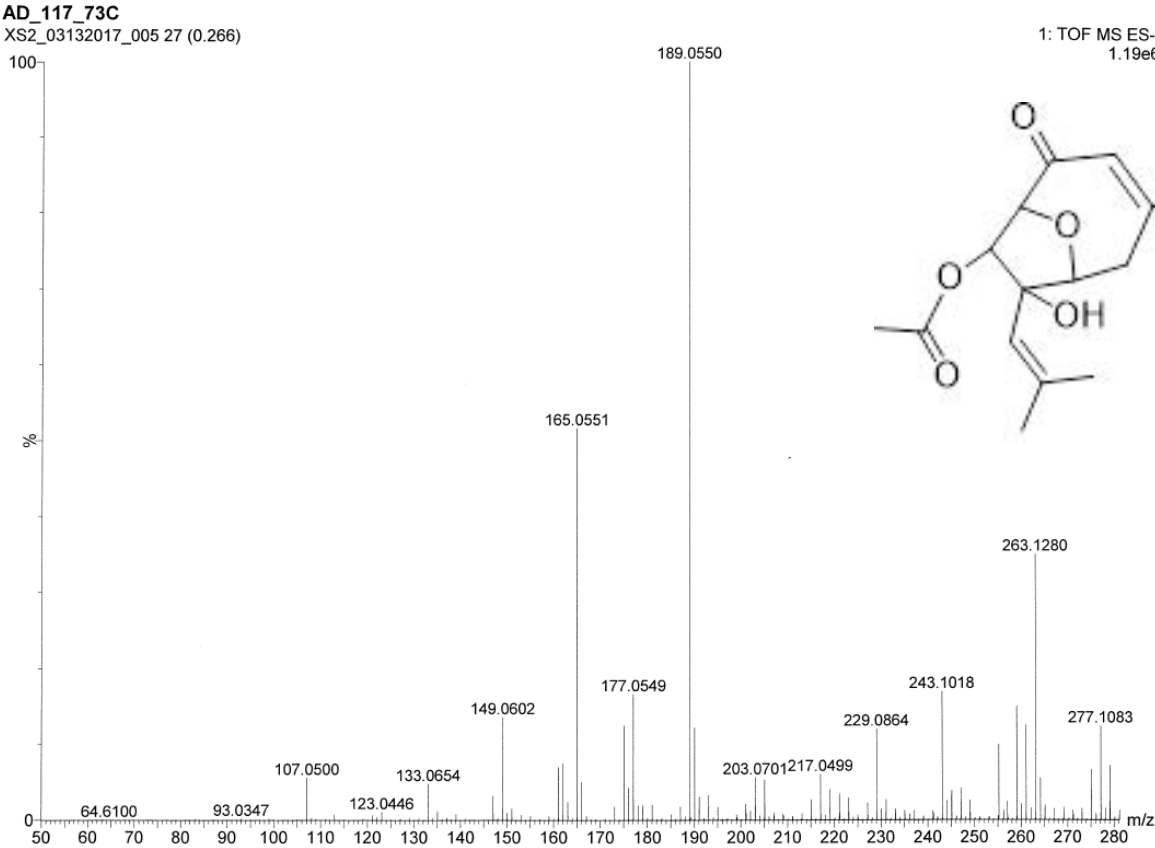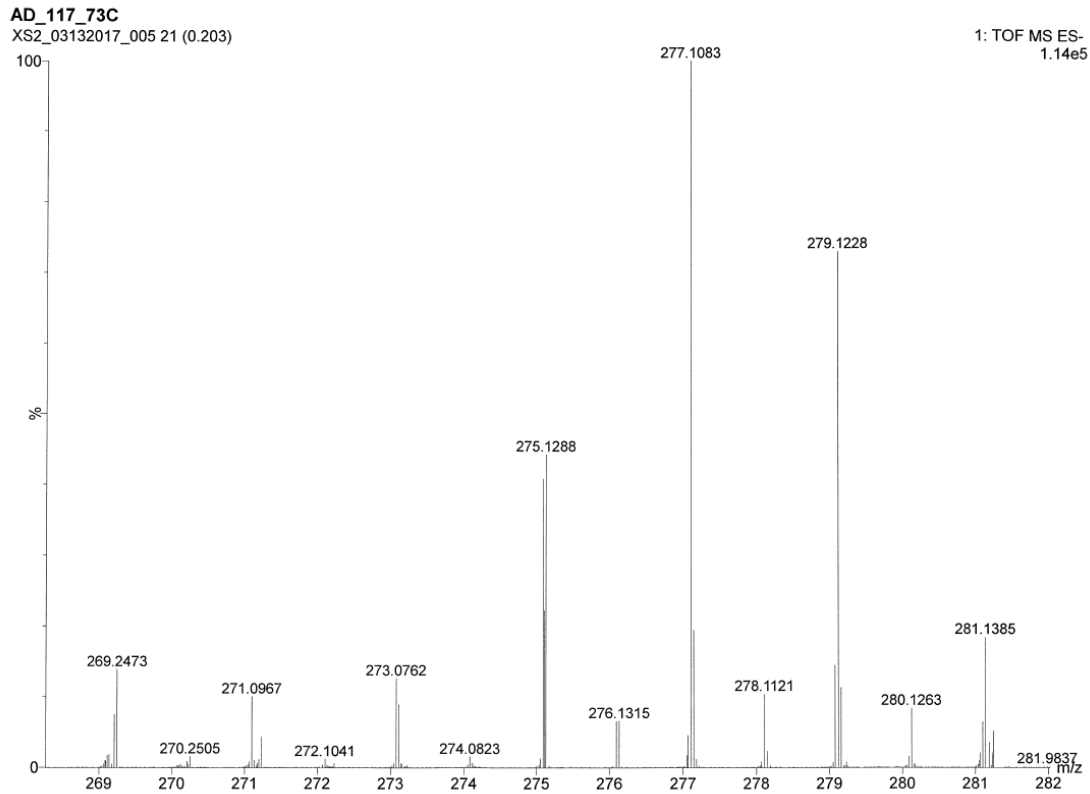

**Figure S27.** Elemental composition of **3** calculated by single mass analysis

### Elemental Composition Report

#### Single Mass Analysis

Tolerance = 5.0 PPM / DBE: min = -1.5, max = 100.0

Element prediction: On (Carbon range  $\pm 5$ ) (Set  $0 < \text{Cl} < 9$ ,  $0 < \text{Br} < 9$  and  $0 < \text{S} < 7$  for enhanced

Number of isotope peaks used for i-FIT = 3

Monoisotopic Mass, Even Electron Ions

33 formula(e) evaluated with 1 results within limits (up to 50 closest results for each mass)

Elements Used:

C: 0-30 H: 0-60 O: 0-8

AD\_117\_73C

XS2\_03132017\_005 21 (0.203)

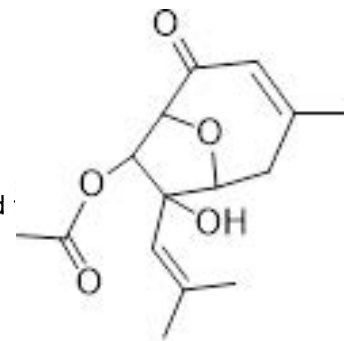

1: TOF MS ES-  
8.29e+004

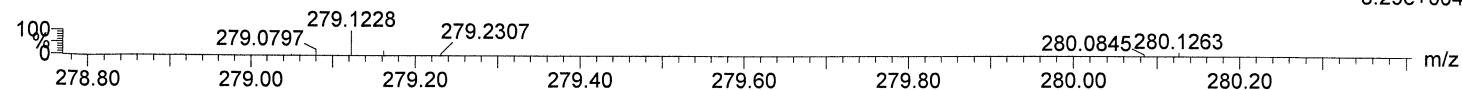

Minimum:

Maximum: 10.0 5.0 -1.5

Maximum: 100.0

| Mass     | Calc. Mass | mDa  | PPM  | DBE | i-FIT | Norm | Conf(%) | Formula    |
|----------|------------|------|------|-----|-------|------|---------|------------|
| 279.1228 | 279.1232   | -0.4 | -1.4 | 6.5 | 77.8  | n/a  | n/a     | C15 H19 O5 |

Figure S28. IR spectrum of **3** in KBr

Sat Feb 04 01:51:46:68 2017

AD/117173C

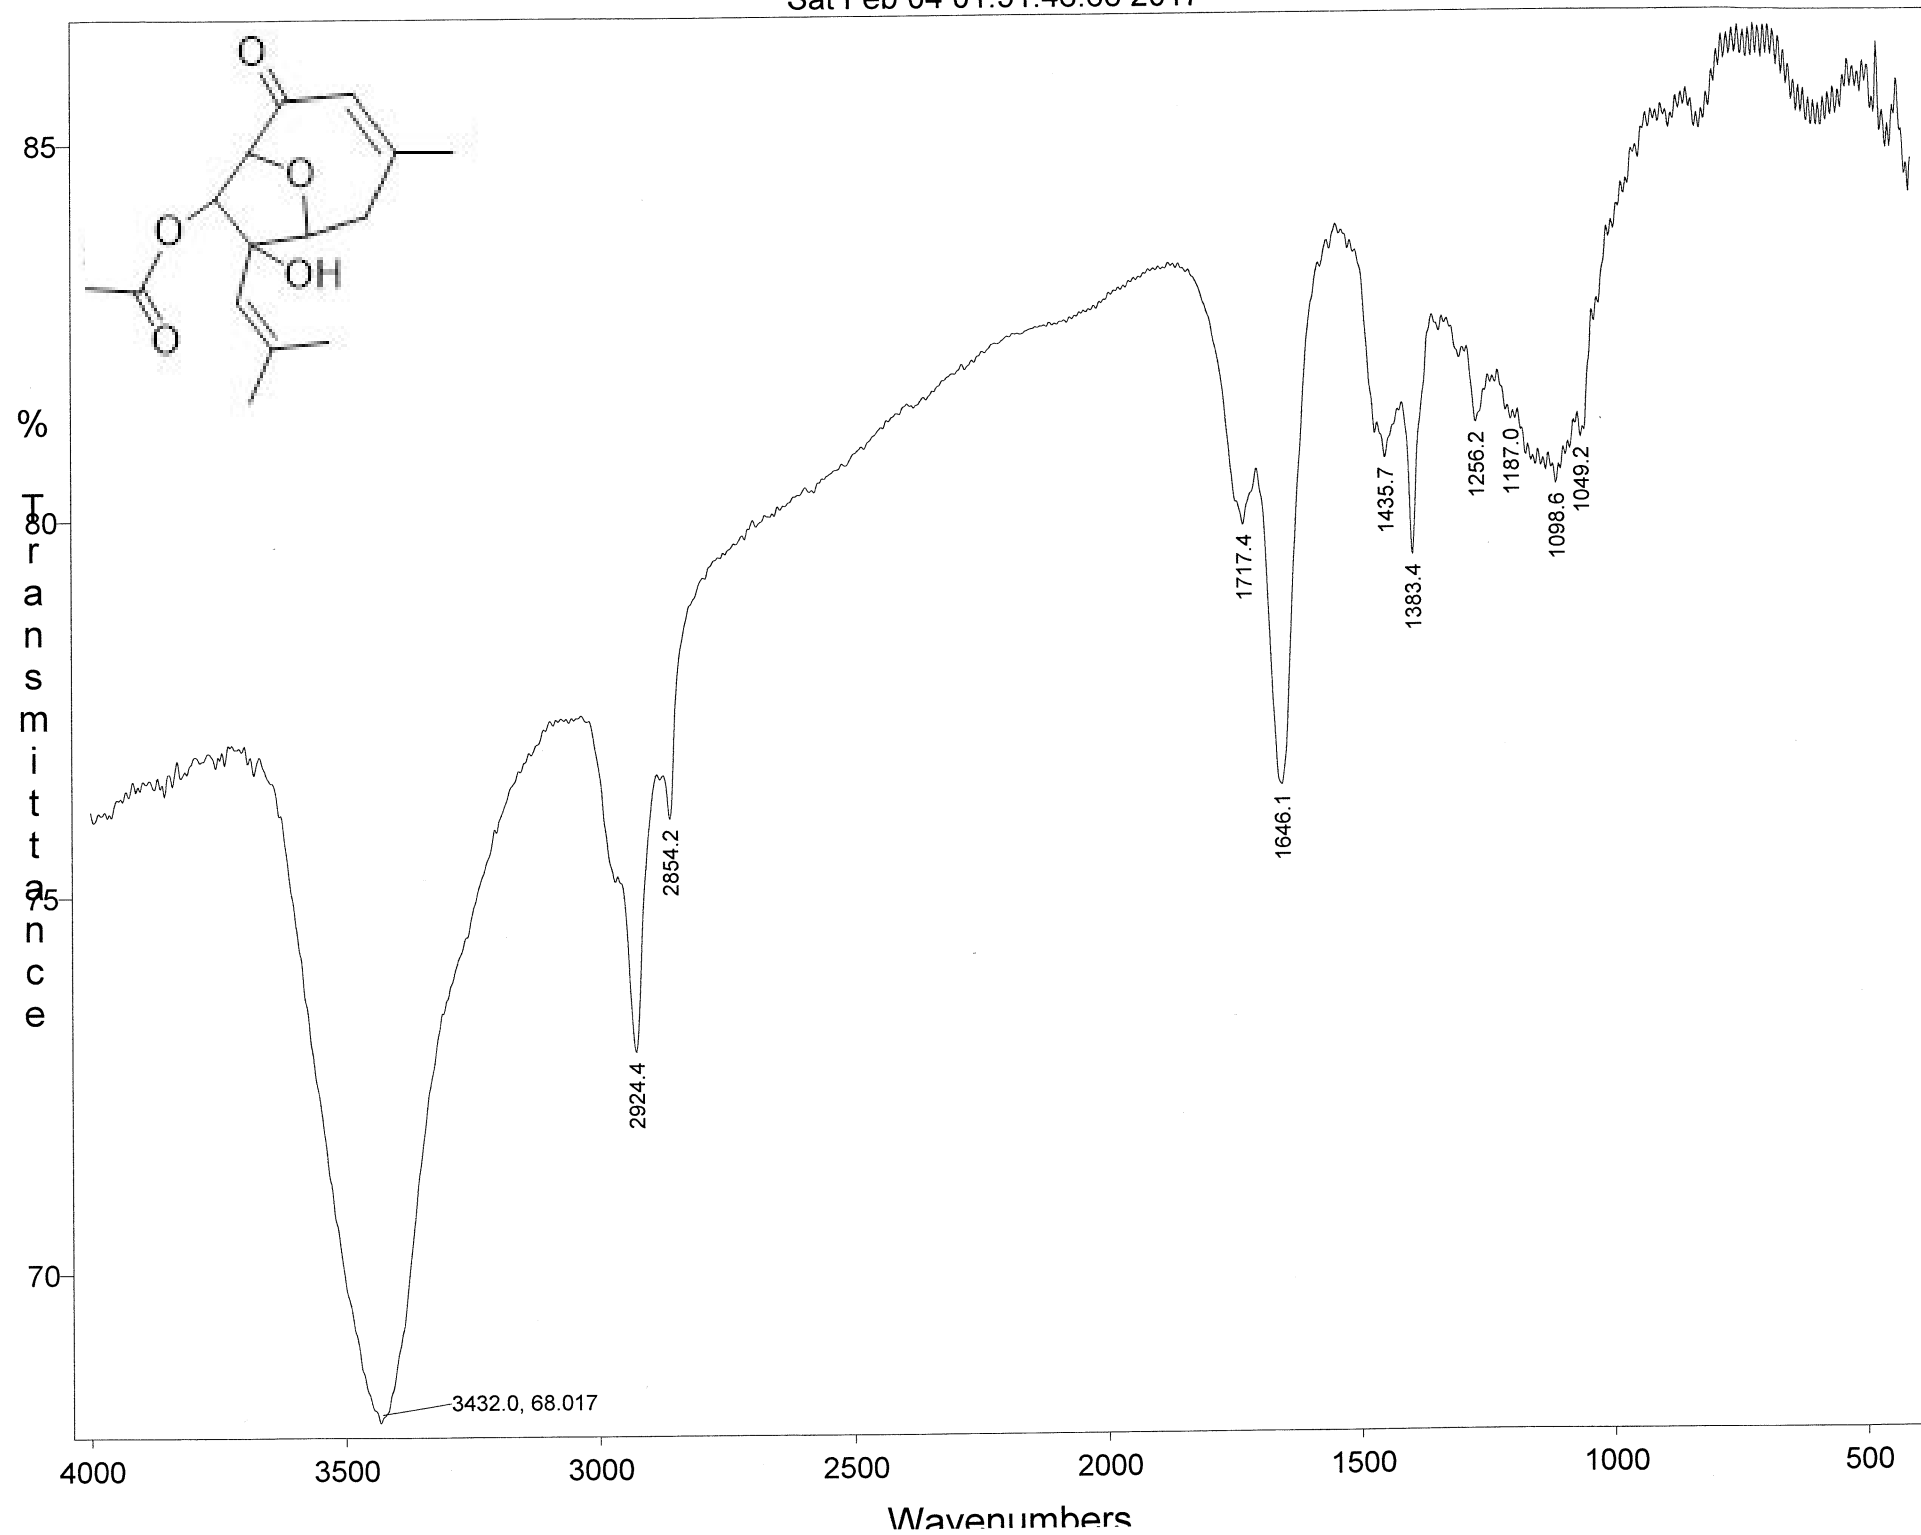

Figure S29. UV/Vis spectrum of 3 in methanol

## Overlay Spectrum Graph Report

02/03/2017 12:34:52 PM

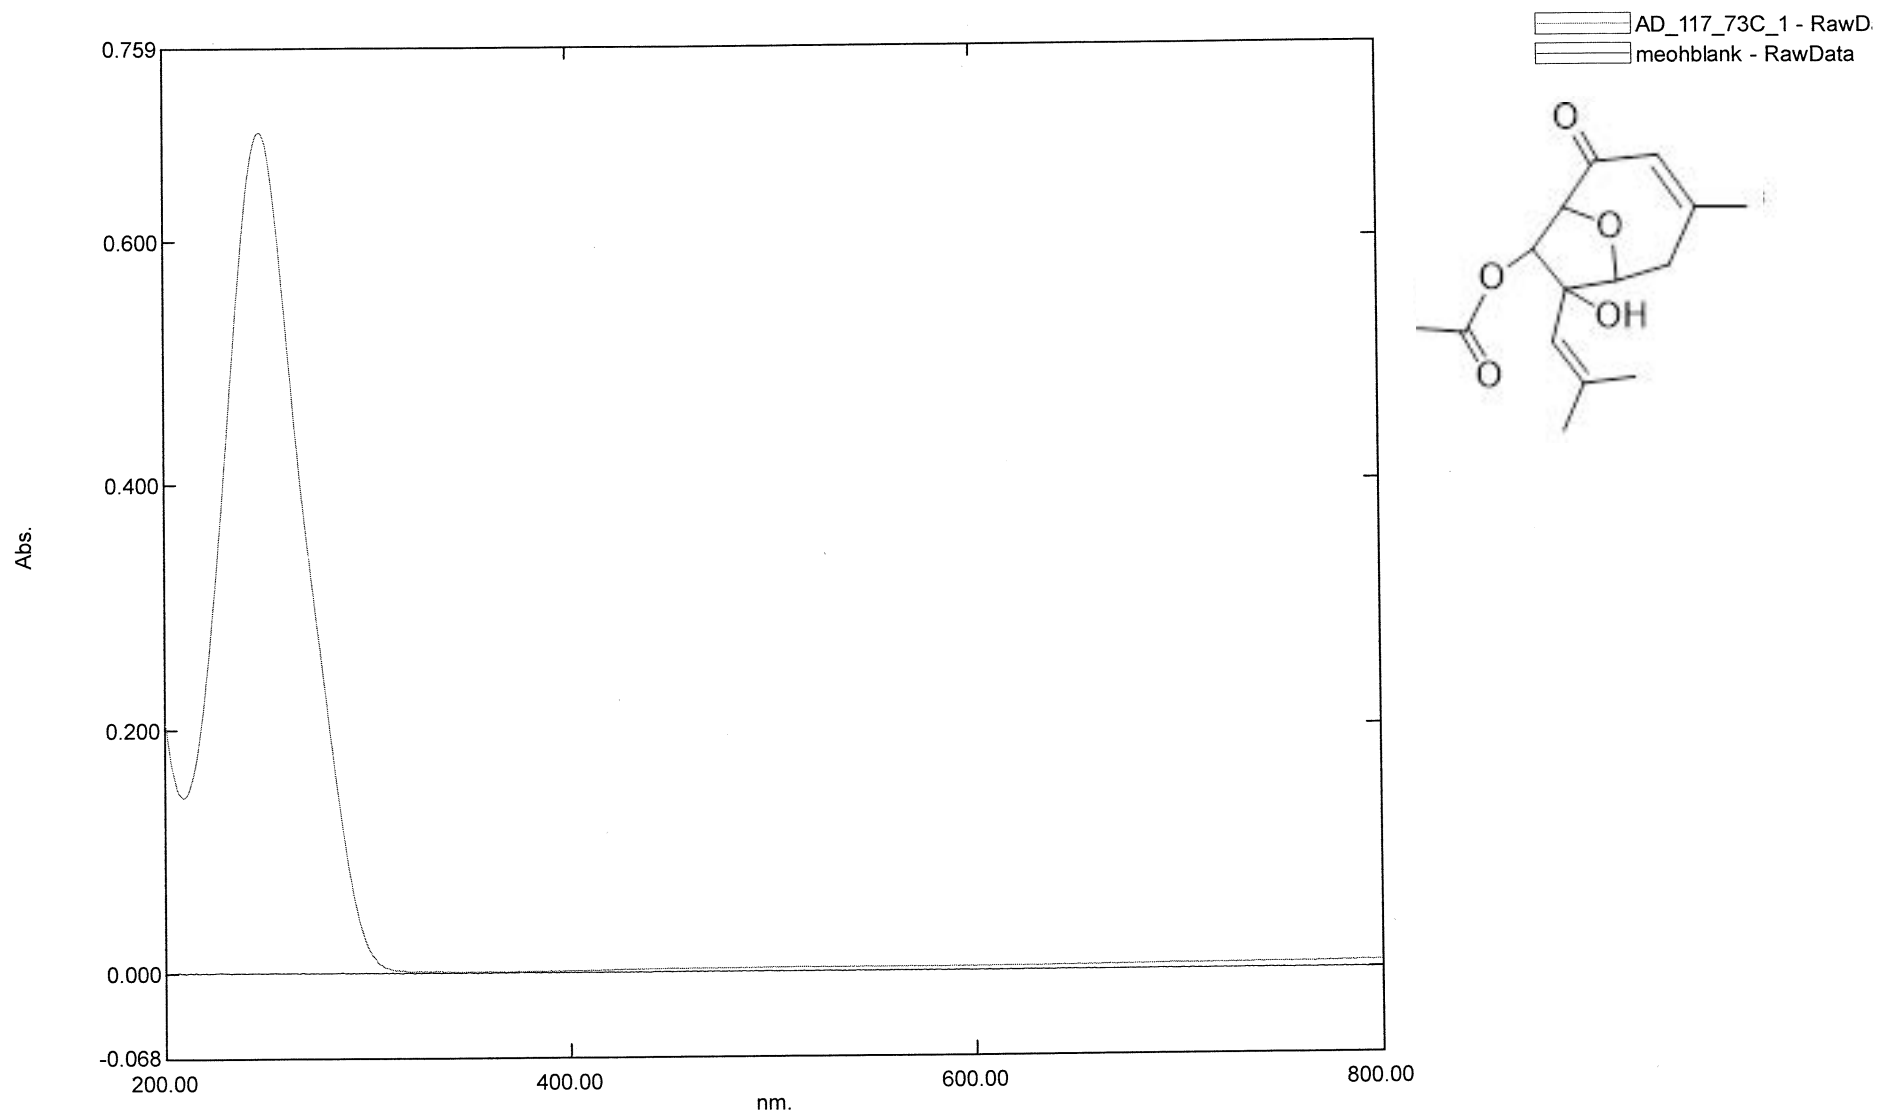

Figure S30. <sup>1</sup>H NMR spectrum of 4 in D<sub>2</sub>O

| INDEX | FREQUENCY | PPM   | HEIGHT | INDEX | FREQUENCY | PPM   | HEIGHT |
|-------|-----------|-------|--------|-------|-----------|-------|--------|
| 1     | 1858.6    | 3.719 | 5.9    | 35    | 487.3     | 0.975 | 90.8   |
| 2     | 1849.8    | 3.702 | 9.9    | 36    | 472.1     | 0.945 | 33.7   |
| 3     | 1844.4    | 3.691 | 4.7    | 37    | 466.3     | 0.933 | 64.3   |
| 4     | 1820.5    | 3.643 | 31.9   | 38    | 462.3     | 0.925 | 57.6   |
| 5     | 1816.6    | 3.635 | 31.2   | 39    | 459.9     | 0.920 | 32.5   |
| 6     | 980.3     | 1.962 | 5.1    | 40    | 455.0     | 0.911 | 95.4   |
| 7     | 977.8     | 1.957 | 5.3    | 41    | 447.7     | 0.896 | 40.0   |
| 8     | 975.4     | 1.952 | 5.4    |       |           |       |        |
| 9     | 972.9     | 1.947 | 5.3    |       |           |       |        |
| 10    | 859.5     | 1.720 | 4.8    |       |           |       |        |
| 11    | 849.2     | 1.699 | 8.0    |       |           |       |        |
| 12    | 847.7     | 1.696 | 5.5    |       |           |       |        |
| 13    | 845.3     | 1.692 | 5.4    |       |           |       |        |
| 14    | 841.4     | 1.684 | 7.2    |       |           |       |        |
| 15    | 839.9     | 1.681 | 6.0    |       |           |       |        |
| 16    | 837.9     | 1.677 | 5.1    |       |           |       |        |
| 17    | 836.5     | 1.674 | 5.7    |       |           |       |        |
| 18    | 834.5     | 1.670 | 7.4    |       |           |       |        |
| 19    | 827.2     | 1.655 | 5.8    |       |           |       |        |
| 20    | 734.3     | 1.469 | 4.6    |       |           |       |        |
| 21    | 729.4     | 1.460 | 5.2    |       |           |       |        |
| 22    | 726.9     | 1.455 | 5.2    |       |           |       |        |
| 23    | 721.1     | 1.443 | 7.1    |       |           |       |        |
| 24    | 716.2     | 1.433 | 6.0    |       |           |       |        |
| 25    | 713.2     | 1.427 | 6.5    |       |           |       |        |
| 26    | 708.3     | 1.418 | 5.7    |       |           |       |        |
| 27    | 630.6     | 1.262 | 5.8    |       |           |       |        |
| 28    | 623.2     | 1.247 | 7.1    |       |           |       |        |
| 29    | 621.3     | 1.243 | 5.9    |       |           |       |        |
| 30    | 617.4     | 1.235 | 5.4    |       |           |       |        |
| 31    | 614.0     | 1.229 | 6.5    |       |           |       |        |
| 32    | 610.0     | 1.221 | 5.4    |       |           |       |        |
| 33    | 608.1     | 1.217 | 5.0    |       |           |       |        |
| 34    | 494.1     | 0.989 | 83.7   |       |           |       |        |

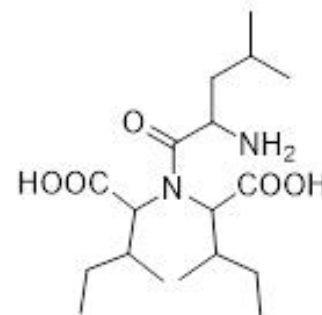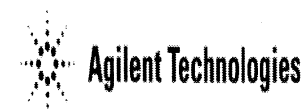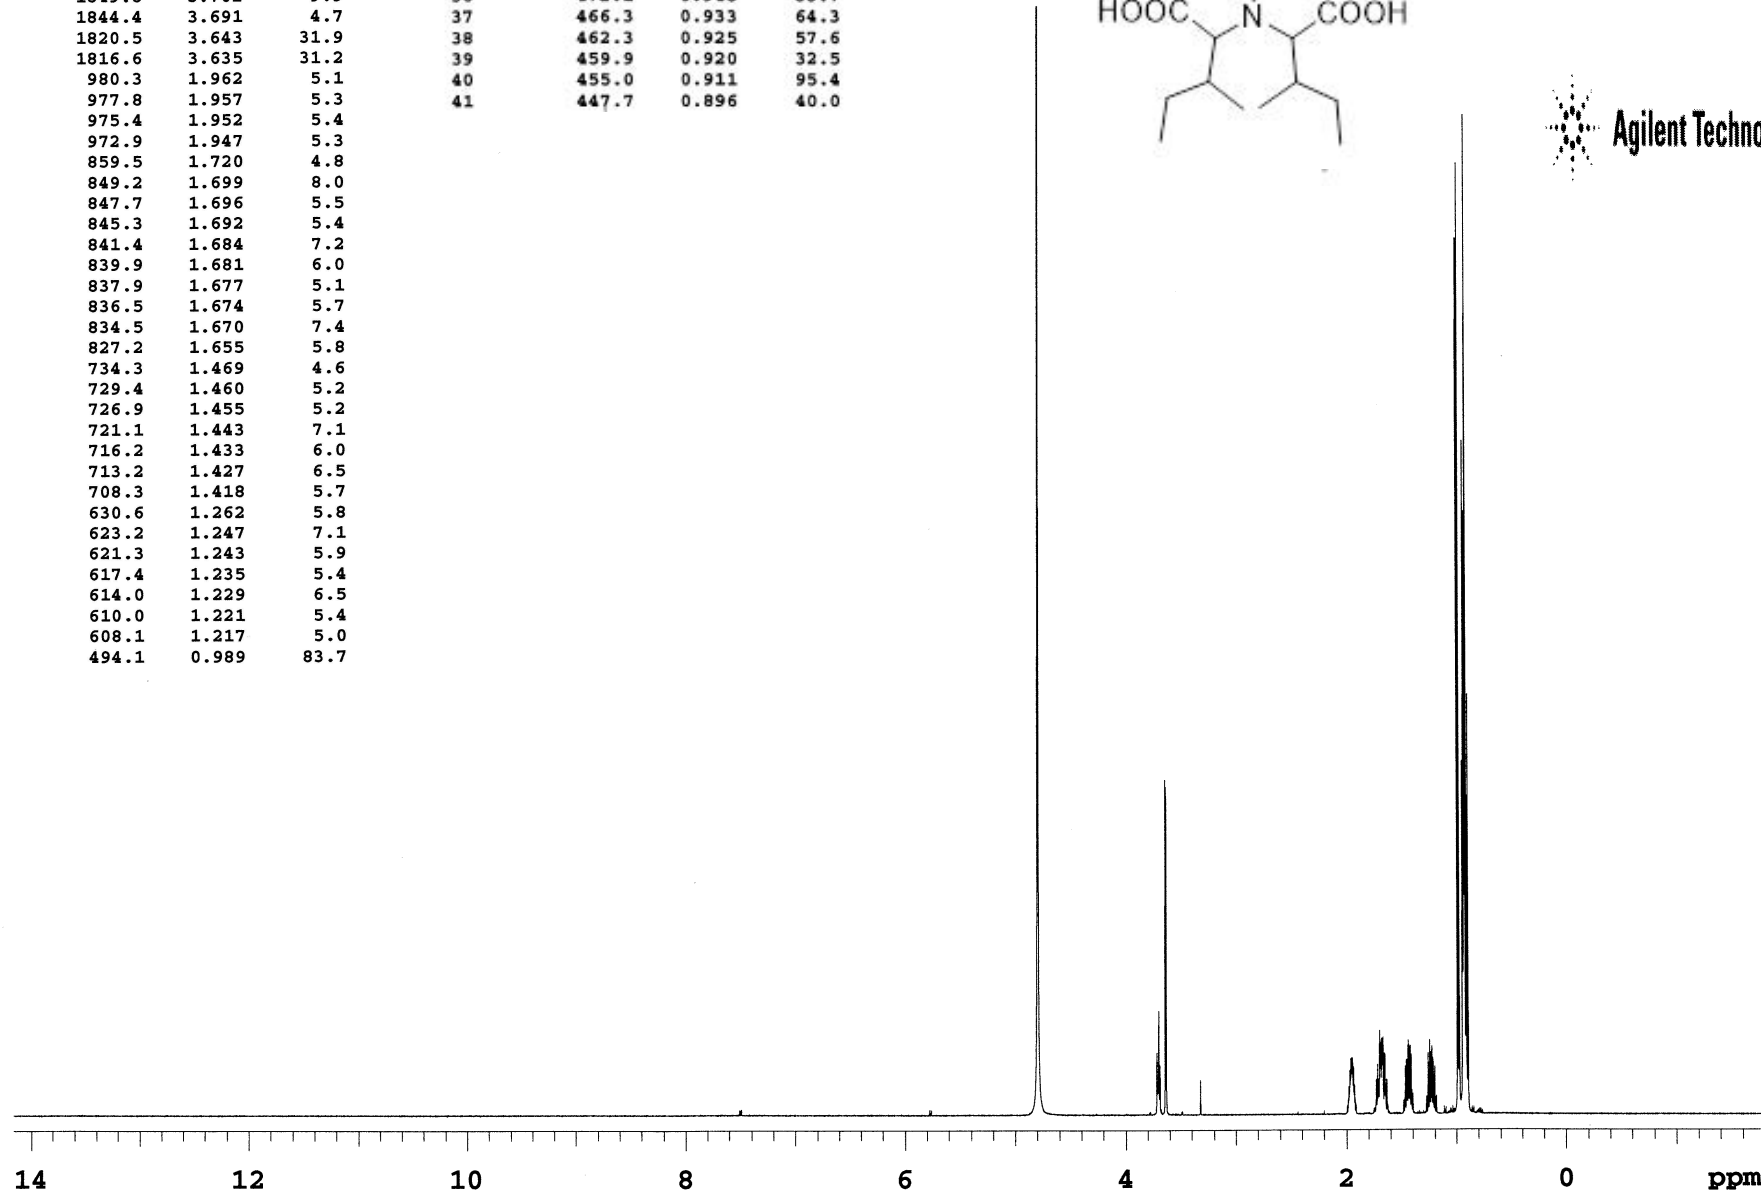



Figure S31. <sup>13</sup>C NMR spectrum of 4 in D<sub>2</sub>O

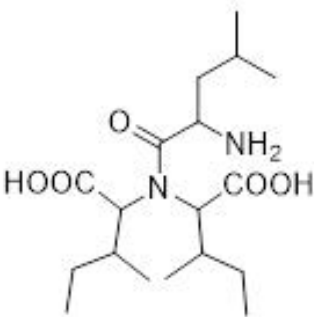

| INDEX | FREQUENCY | PPM     | HEIGHT |
|-------|-----------|---------|--------|
| 1     | 22050.6   | 175.494 | 16.2   |
| 2     | 21873.7   | 174.086 | 29.6   |
| 3     | 7466.8    | 59.426  | 72.0   |
| 4     | 6695.7    | 53.289  | 35.9   |
| 5     | 4985.6    | 39.679  | 48.1   |
| 6     | 4494.2    | 35.768  | 94.9   |
| 7     | 3056.0    | 24.322  | 92.8   |
| 8     | 3019.6    | 24.032  | 54.8   |
| 9     | 2751.1    | 21.895  | 54.1   |
| 10    | 2604.5    | 20.728  | 53.9   |
| 11    | 1829.1    | 14.558  | 94.5   |
| 12    | 1378.3    | 10.969  | 104.5  |

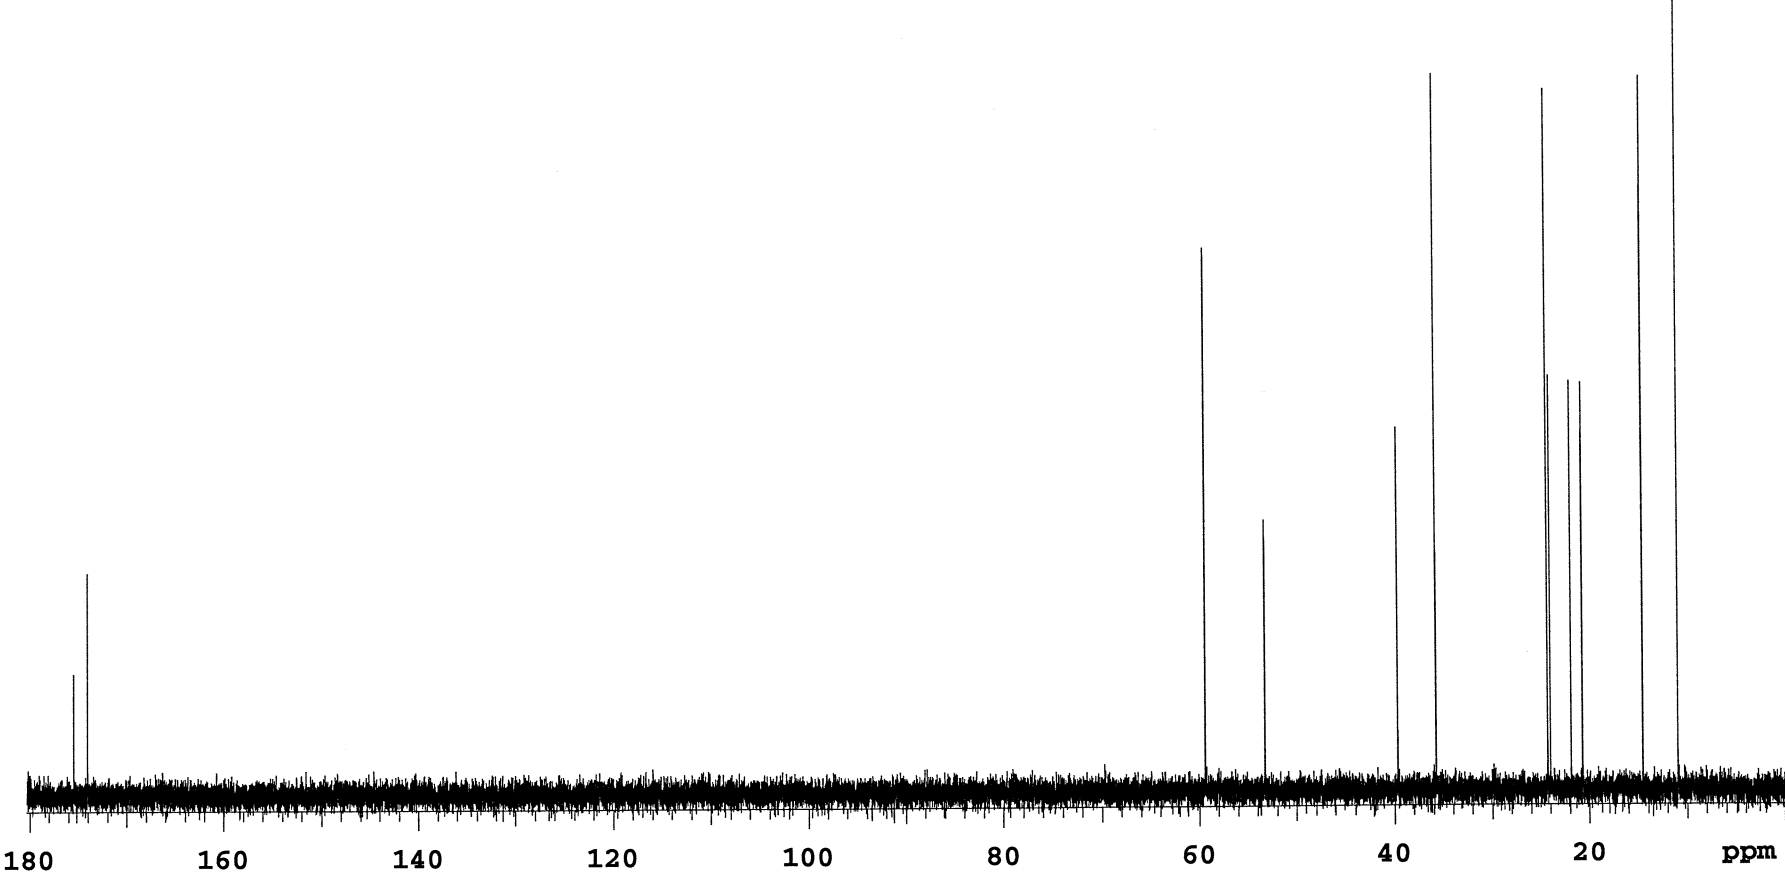

Figure S32. DEPT spectrum of 4 in D<sub>2</sub>O

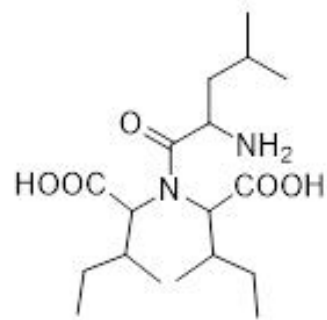

A\_D2O

ne AD\_117\_95A\_D2O  
ed 2016-11-16

Pulse sequence DEPT  
Solvent d2o

Temperature 25  
Spectrometer ormuzd-vnmrs500

Study owner amilad  
Operator amilad

CH3 carbons

CH2 carbons

CH carbons

quaternary carbons

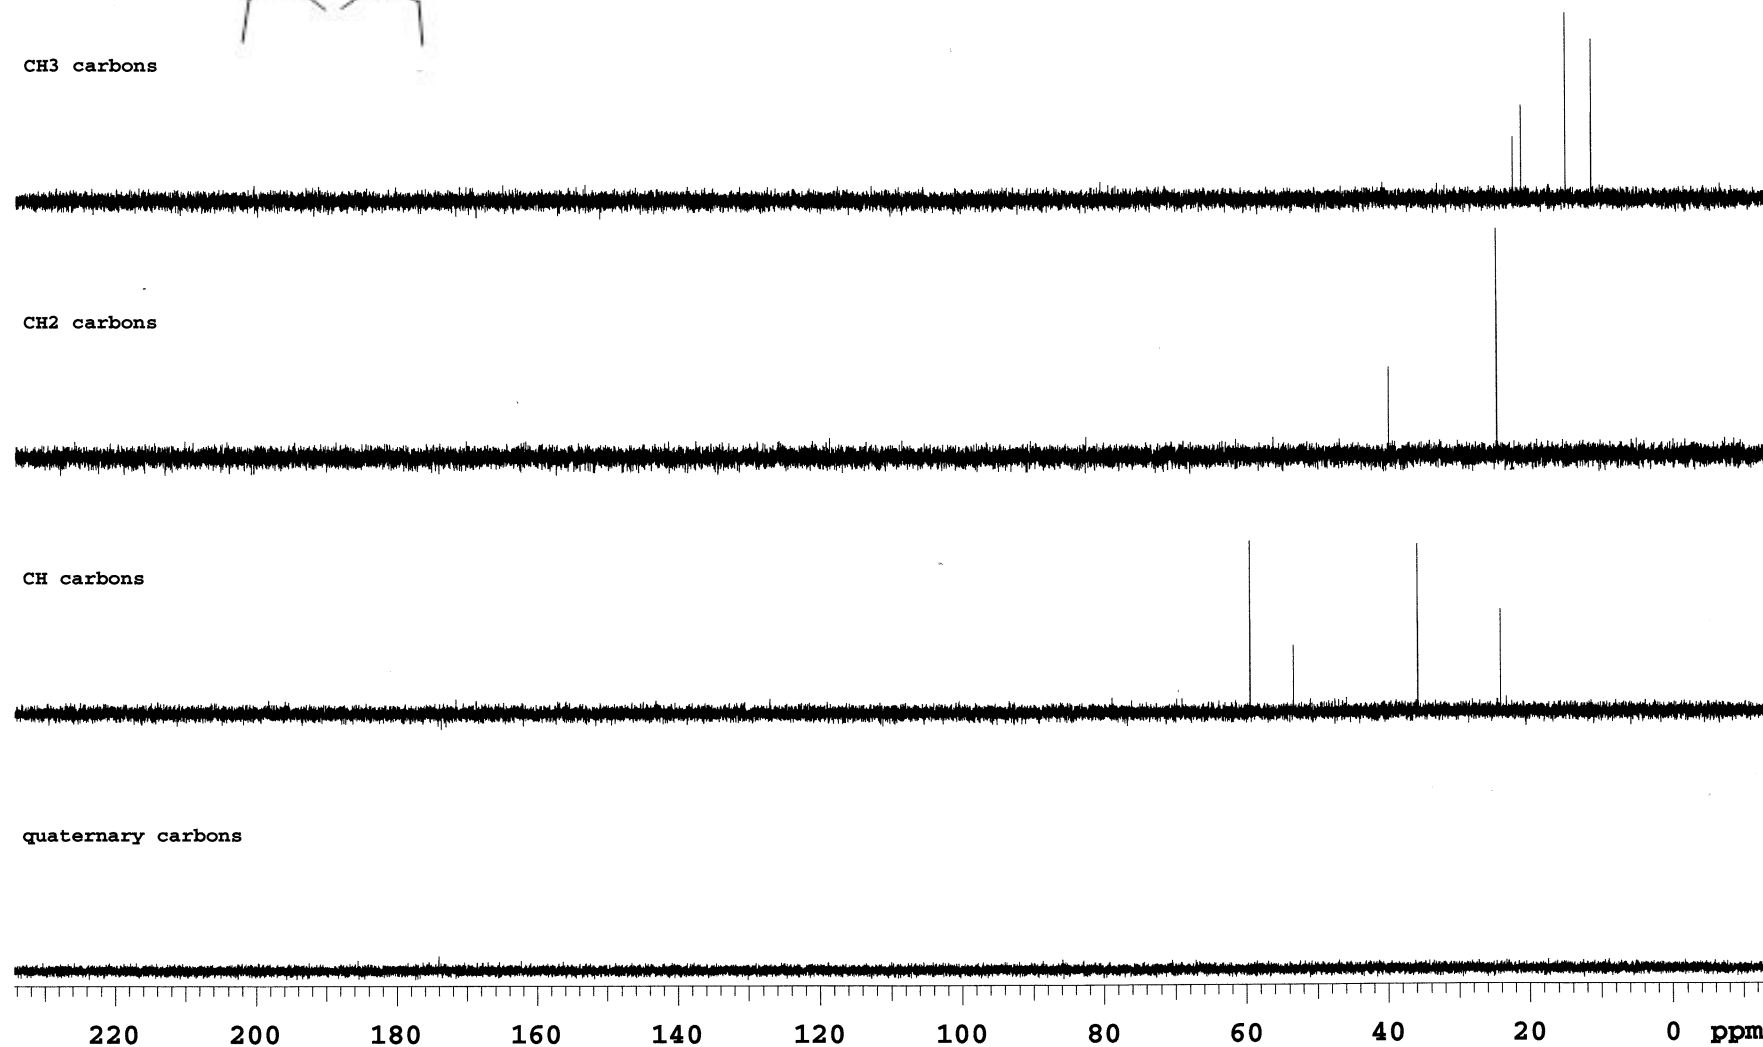

Figure S33. HSQC spectrum of 4 in D<sub>2</sub>O

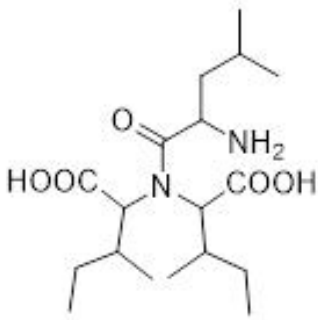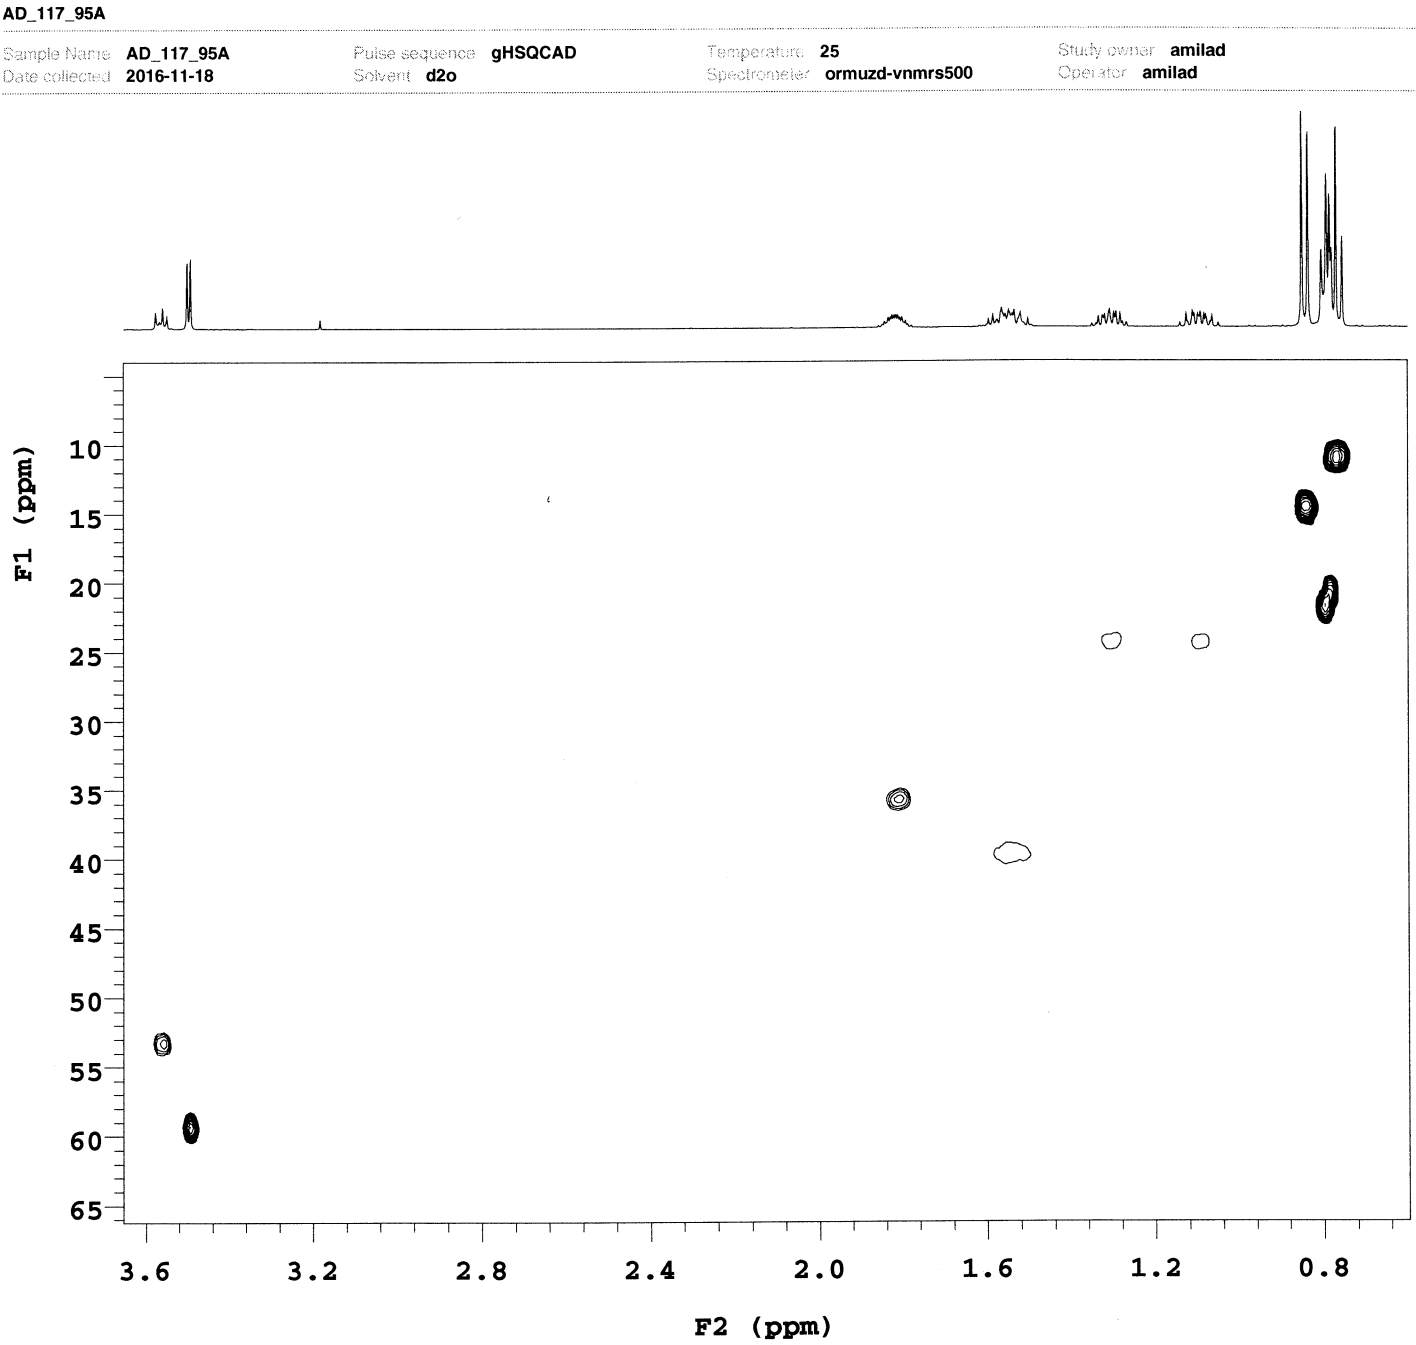

Figure S34. HR-ESITOFMS (positive) of 4

AD\_117\_95A

XS2\_03132017\_007 664 (4.081)

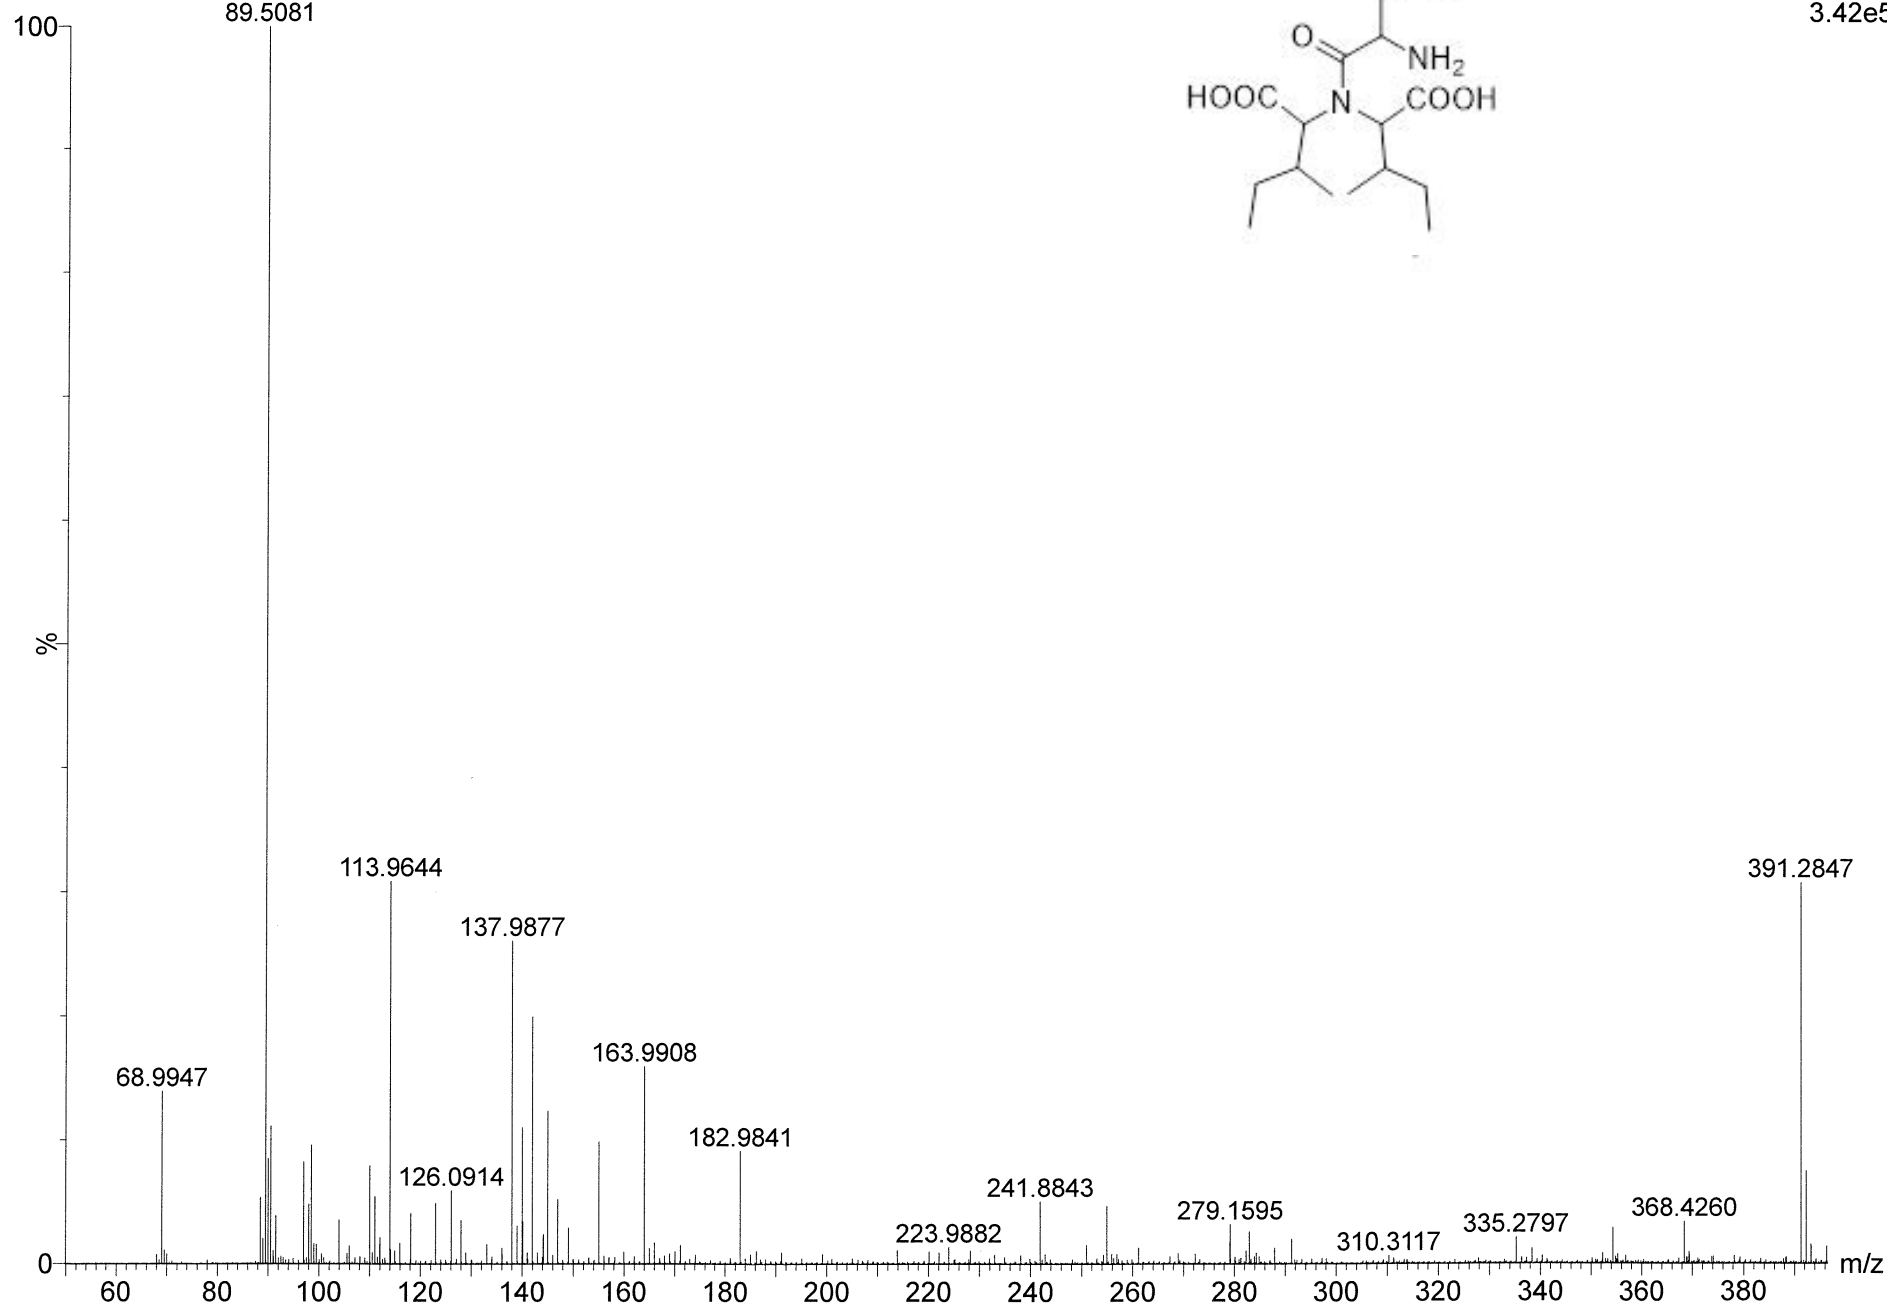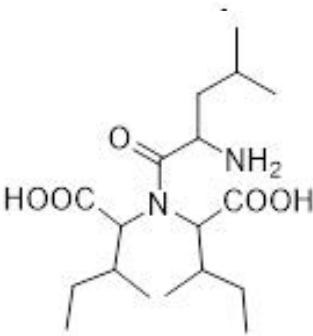

1: TOF MS ES+  
3.42e5

Figure S35. Elemental composition of 4 calculated by single mass analysis

Elemental Composition Report

Single Mass Analysis

Tolerance = 10.0 PPM / DBE: min = -1.5, max = 100.0  
Element prediction: On (Carbon range  $\pm 5$ ) (Set  $0 < Cl < 9$ ,  $0 < Br < 9$  and  $0 < S < 7$  for enhanced filter)  
Number of isotope peaks used for i-FIT = 3

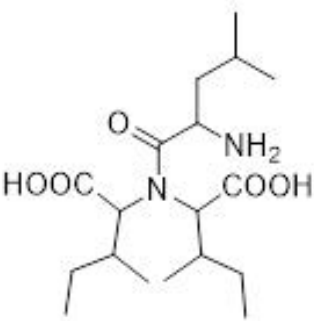

Monoisotopic Mass, Even Electron Ions  
31 formula(e) evaluated with 1 results within limits (up to 50 closest results for each mass)  
Elements Used:  
C: 0-22 H: 0-60 N: 0-2 O: 0-6  
AD\_117\_95A  
XS2\_03132017\_007 664 (4.081)

1: TOF MS ES+  
3.42e+005

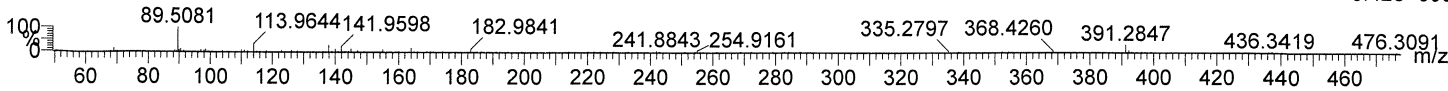

Minimum: -1.5  
Maximum: 10.0 10.0 100.0

| Mass     | Calc. Mass | mDa | PPM  | DBE | i-FIT | Norm | Conf(%) | Formula       |
|----------|------------|-----|------|-----|-------|------|---------|---------------|
| 391.2847 | 391.2808   | 3.9 | 10.0 | 1.5 | 581.8 | n/a  | n/a     | C19 H39 N2 O6 |

Figure S36. IR spectrum of 4 in KBr

Sat Feb 04 02:11:32:73 2017

AD/117/95A

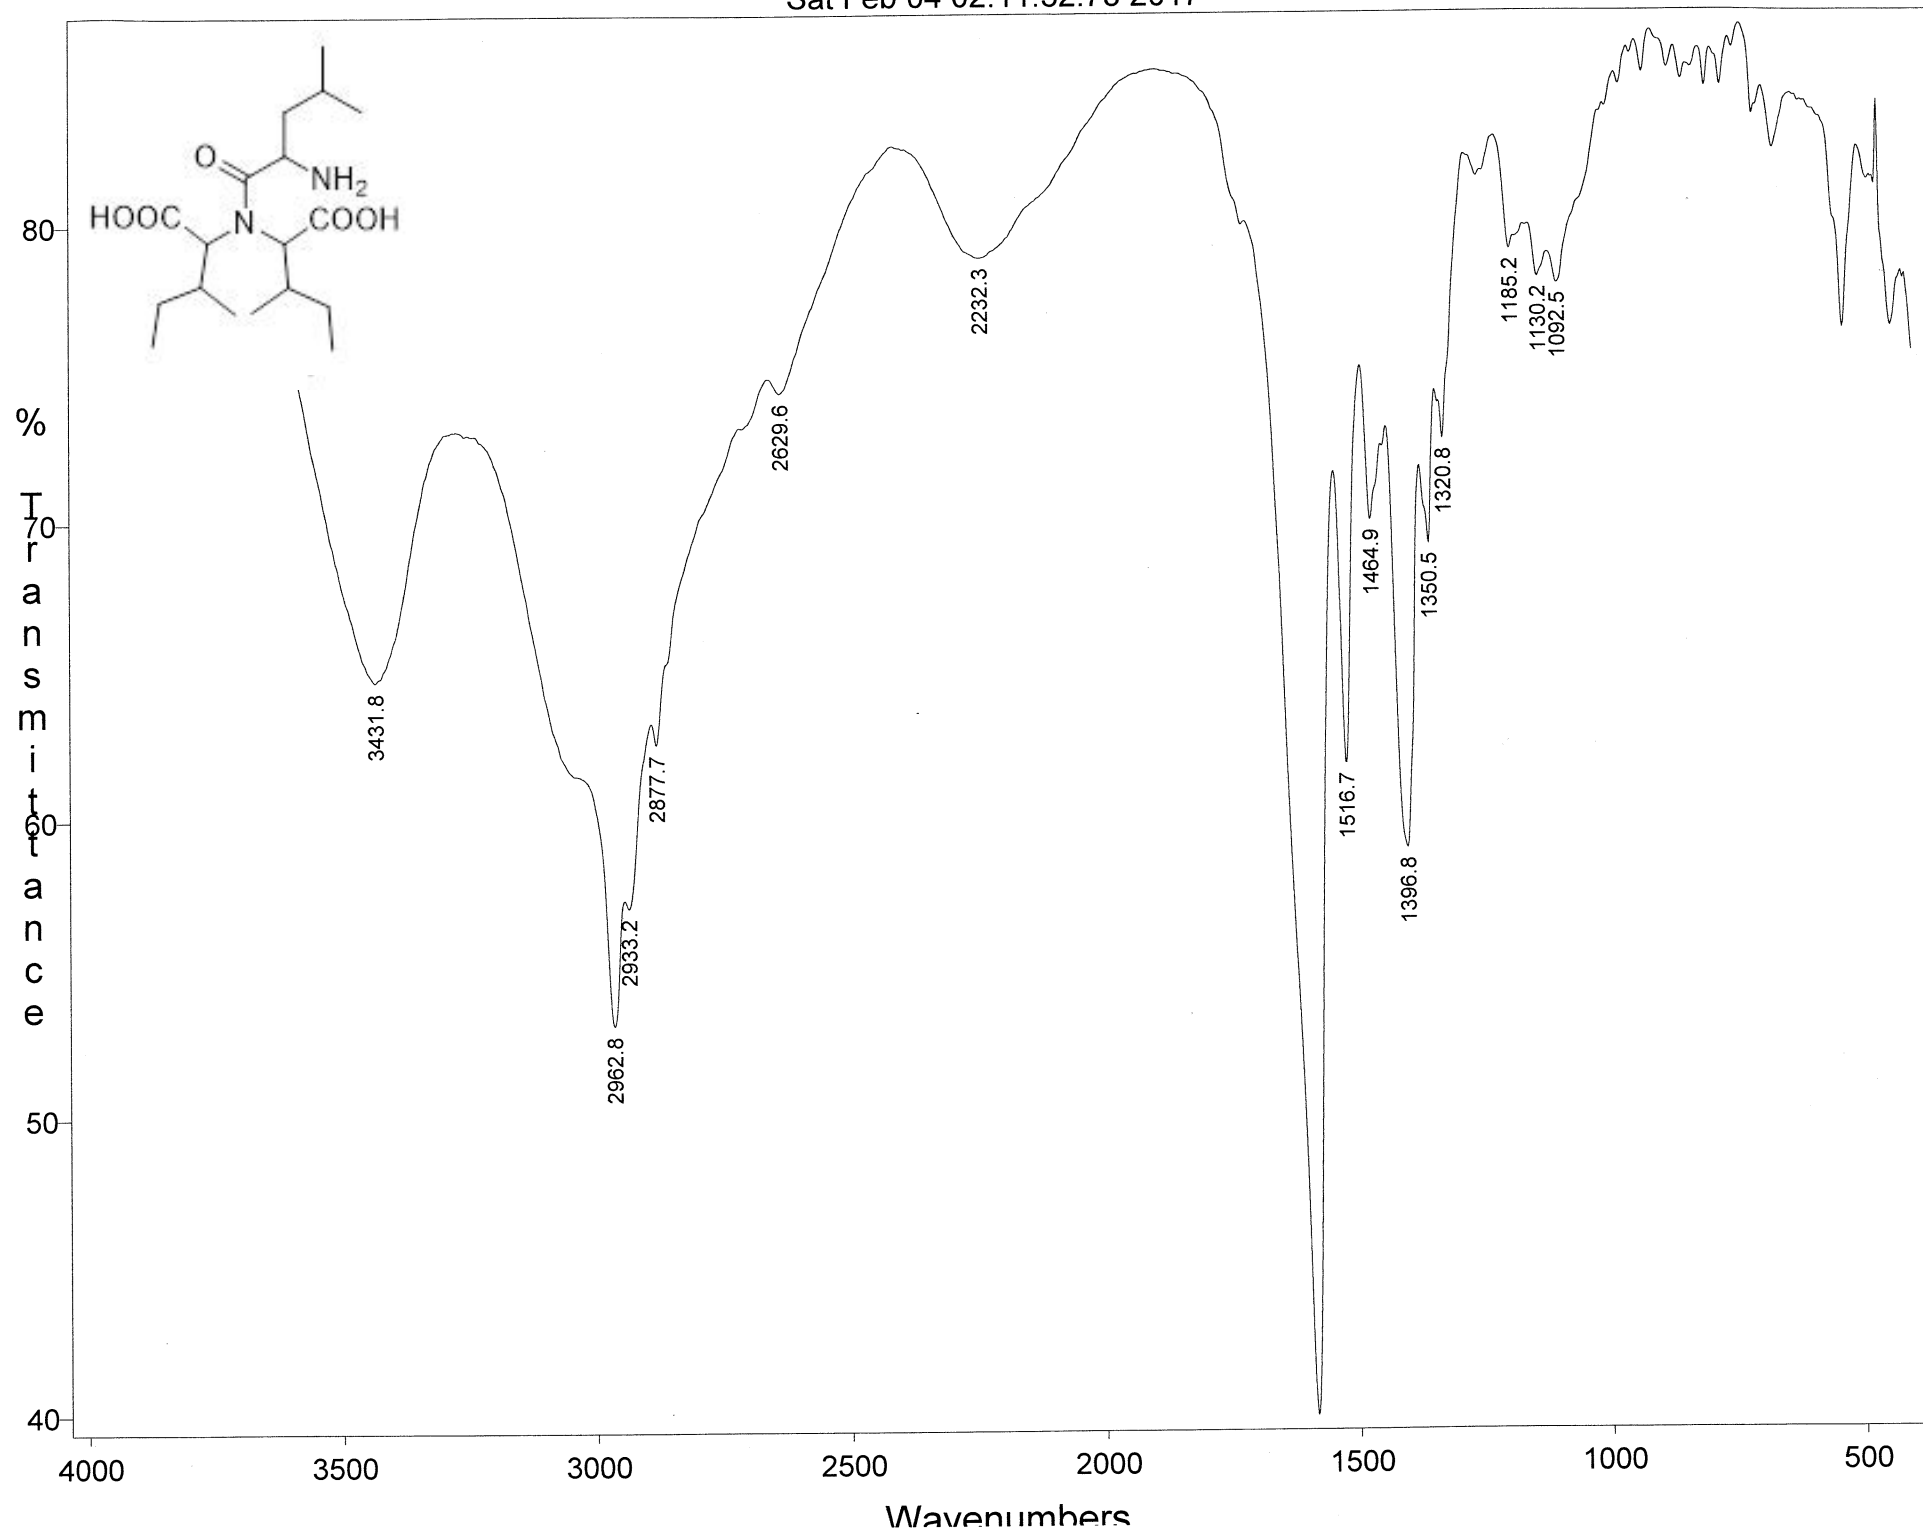

Figure S37. UV/Vis spectrum of 4 water

## Overlay Spectrum Graph Report

02/03/2017 12:50:00 PM

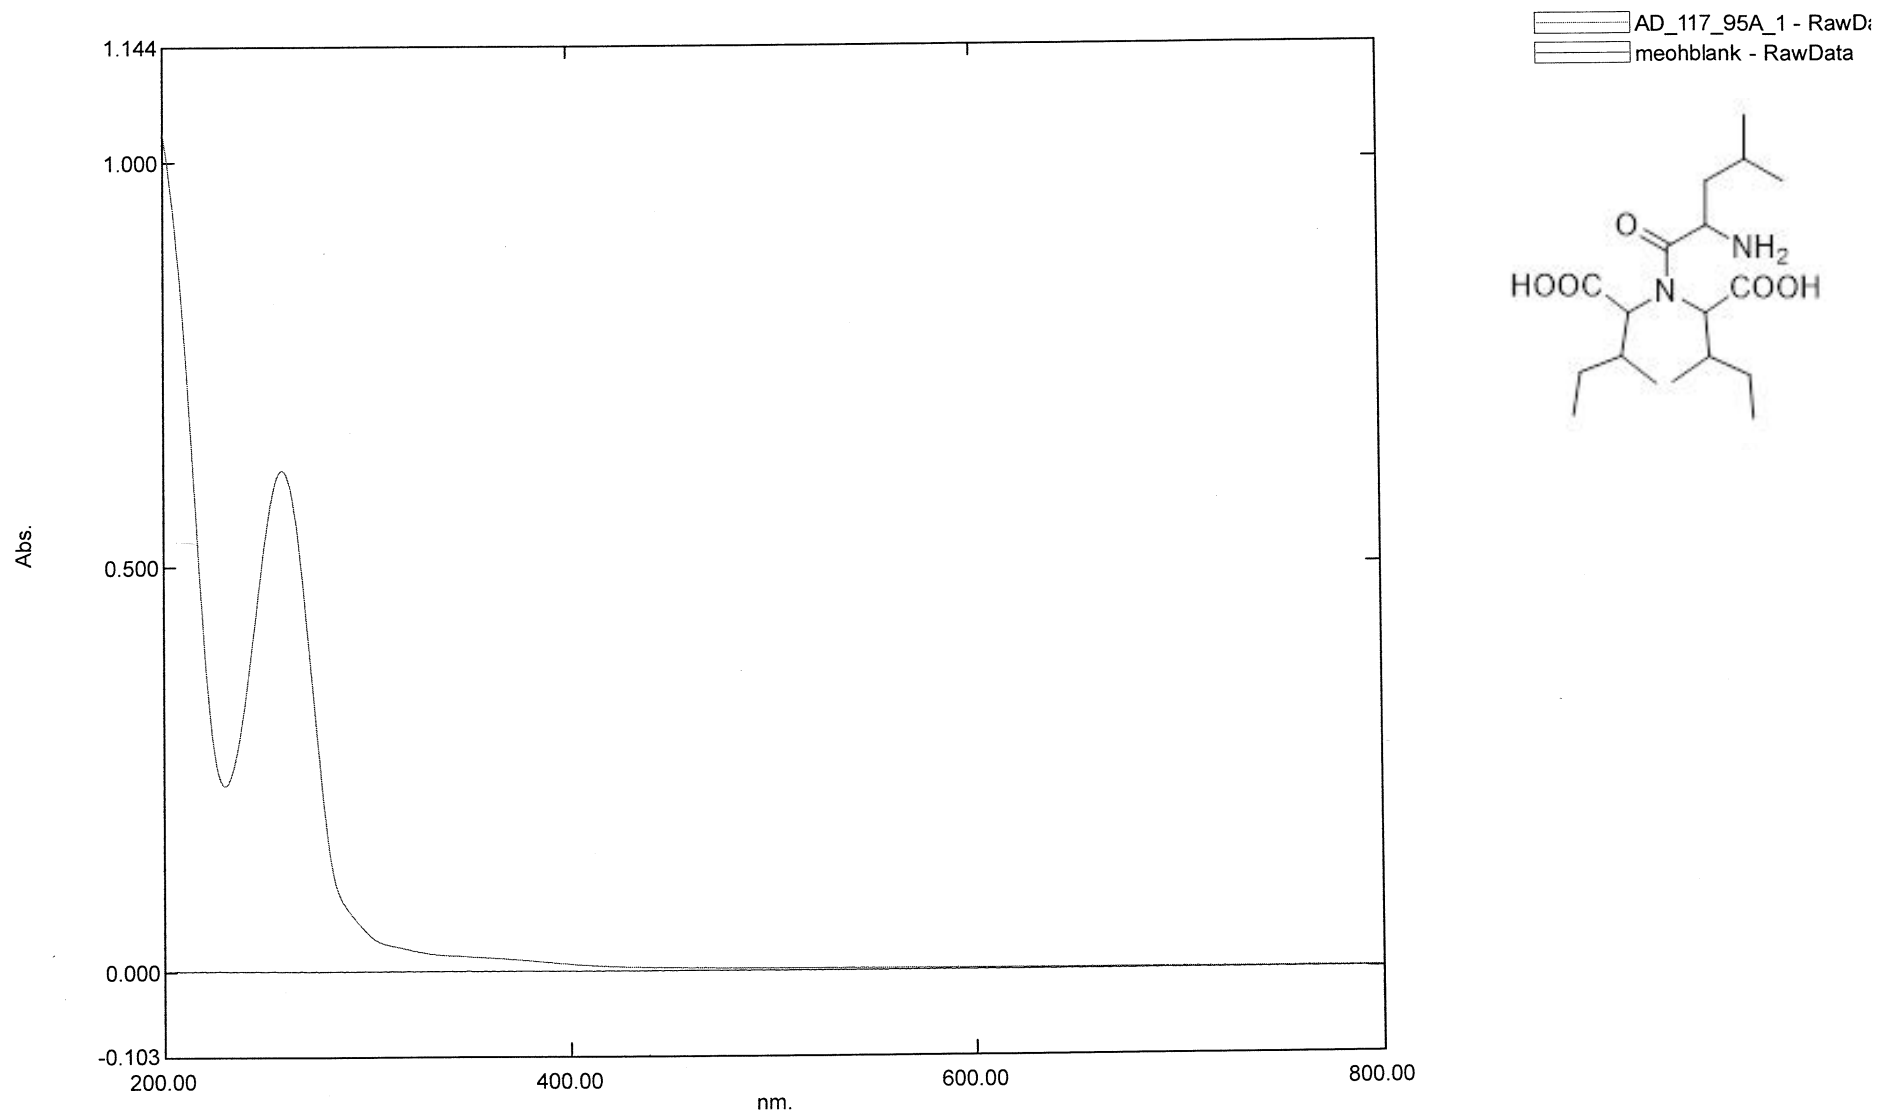

Figure S38. HOMODEC NMR spectrum of 4 D<sub>2</sub>O ( $\delta H = 3.71$ )

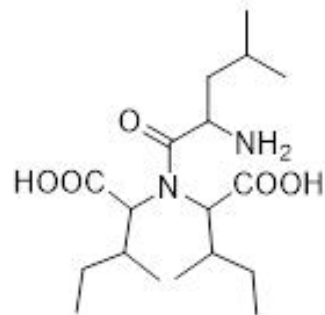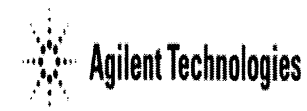

Sample Name:  
AD\_117\_95A  
Data Collected on:  
ormuzd-vnmrs500  
Archive directory:  
/home/walkup/vnmrsys/data/amilad  
Sample directory:  
AD\_117\_95A\_20161220\_01  
FidFile: AD\_117\_95A\_HOMODEC\_01

Pulse Sequence: HOMODEC  
Solvent: d2o  
Data collected on: Dec 20 2016

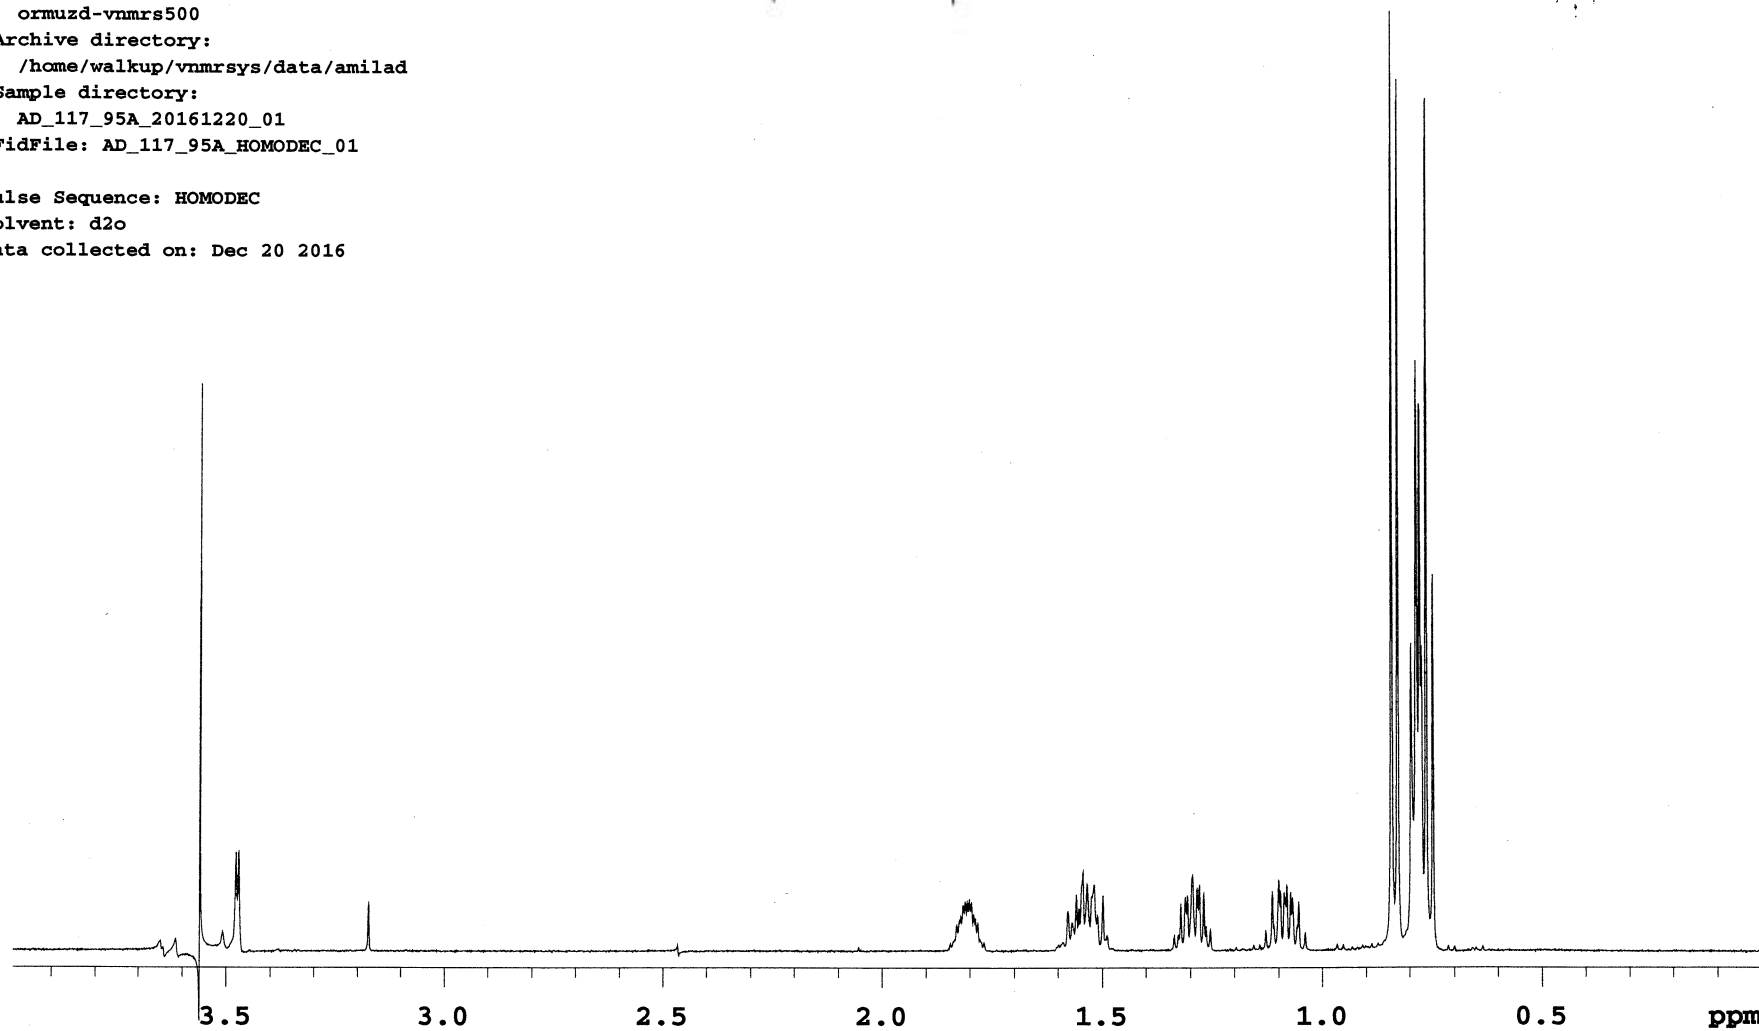



Figure S39. HOMODEC NMR spectrum of 4 D<sub>2</sub>O ( $\delta H = 1.67$ )

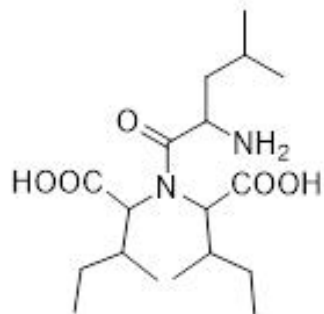

Sample Name:

AD\_117\_95D

Data Collected on:

ormuzd-vnmrs500

Archive directory:

/home/walkup/vnmrsys/data/amilad

Sample directory:

AD\_117\_95D\_20161219\_01

FidFile: AD\_117\_95D\_HOMODEC\_01

Pulse Sequence: HOMODEC

Solvent: d2o

Data collected on: Dec 19 2016

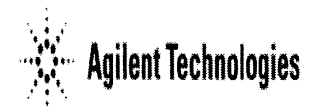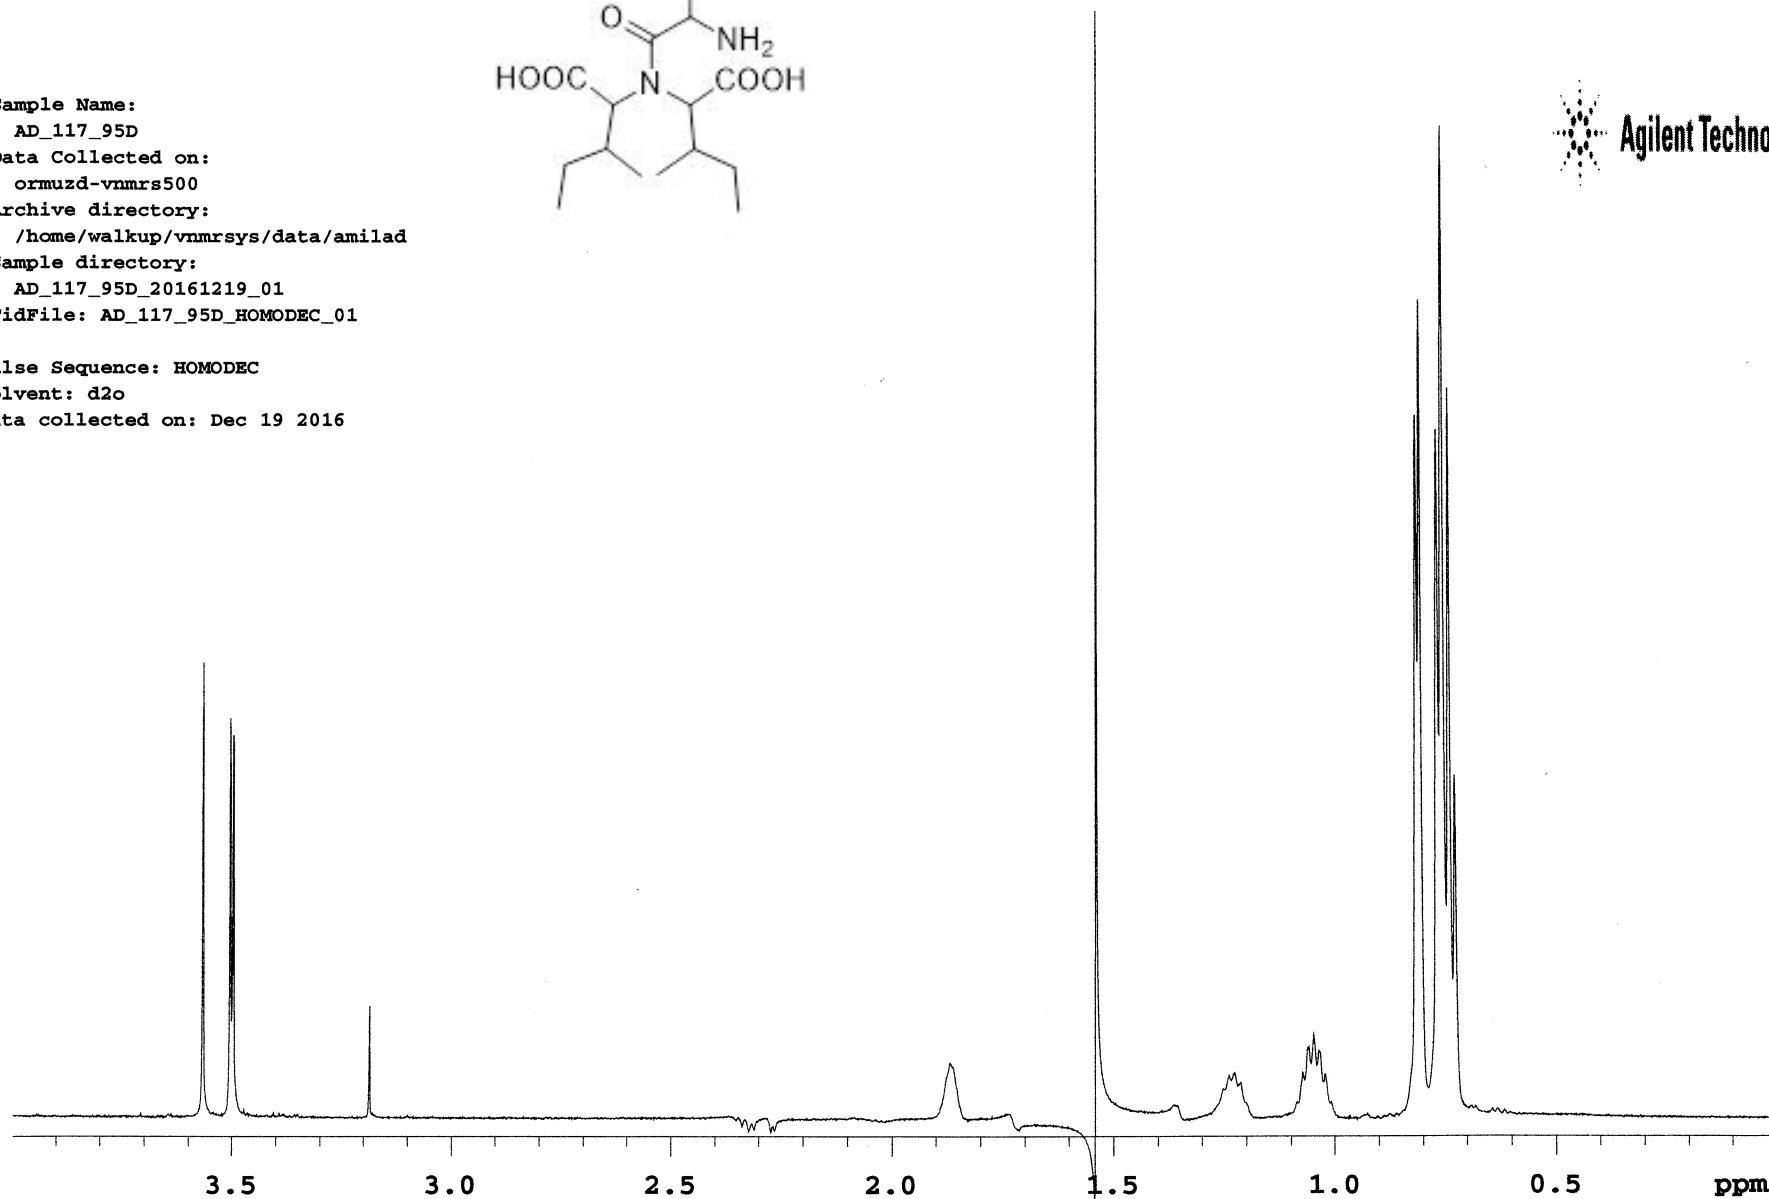

**Figure S40.** HOMODEC NMR spectrum of **4** D<sub>2</sub>O ( $\delta H = 3.64$ )

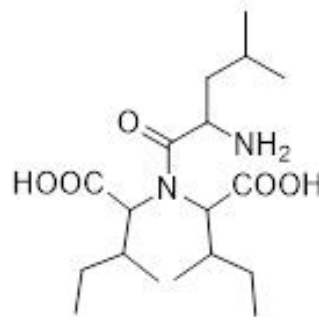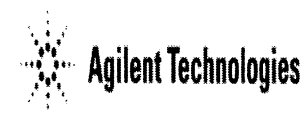

Sample Name:  
AD\_117\_95D  
Data Collected on:  
ormuzd-vnmrs500  
Archive directory:  
/home/walkup/vnmrsys/data/amilad  
Sample directory:  
AD\_117\_95D\_20161219\_01  
FidFile: AD\_117\_95D\_HOMODEC\_01

Pulse Sequence: HOMODEC  
Solvent: d2o  
Data collected on: Dec 19 2016

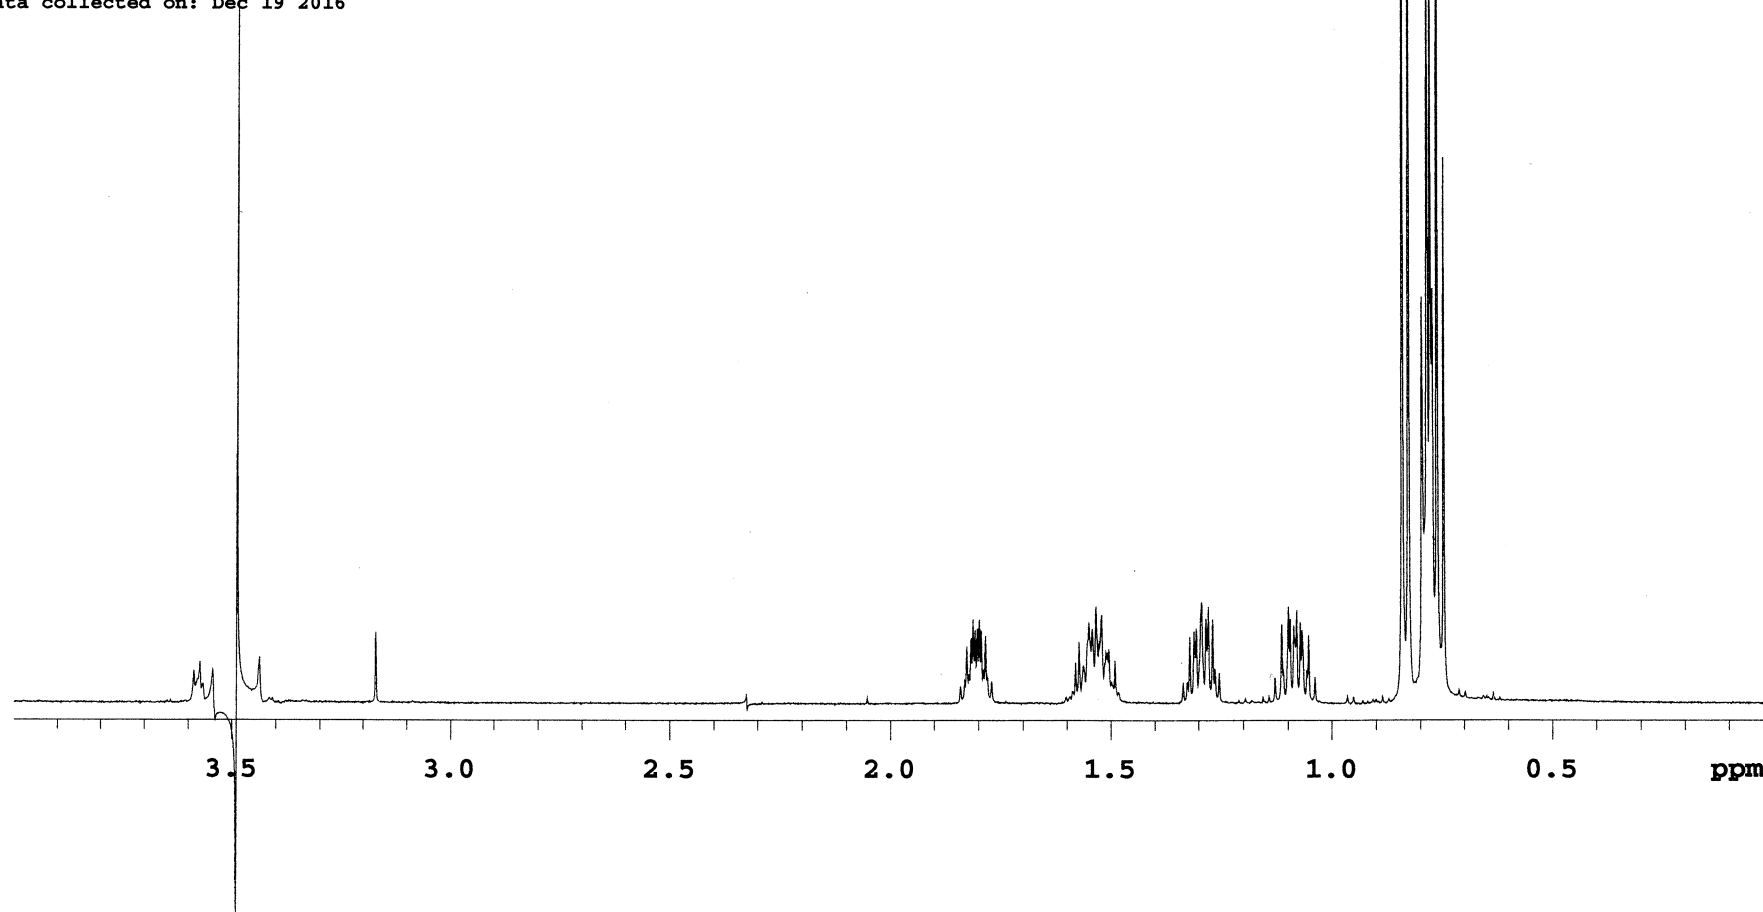

**Figure S41.** HOMODEC NMR spectrum of **4** D<sub>2</sub>O ( $\delta H = 1.94$ )

Sample Name:  
AD\_117\_95D  
Data Collected on:  
ormuzd-vnmrs500  
Archive directory:  
/home/walkup/vnmrsys/data/amilad  
Sample directory:  
AD\_117\_95D\_20161219\_01  
FidFile: AD\_117\_95D\_HOMODEC\_01

Pulse Sequence: HOMODEC  
Solvent: d2o  
Data collected on: Dec 19 2016

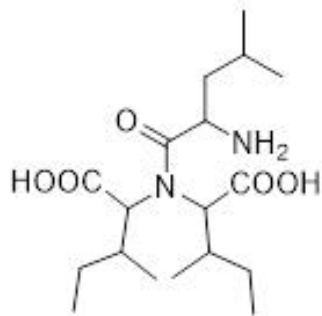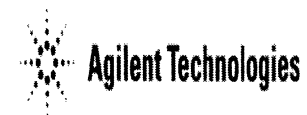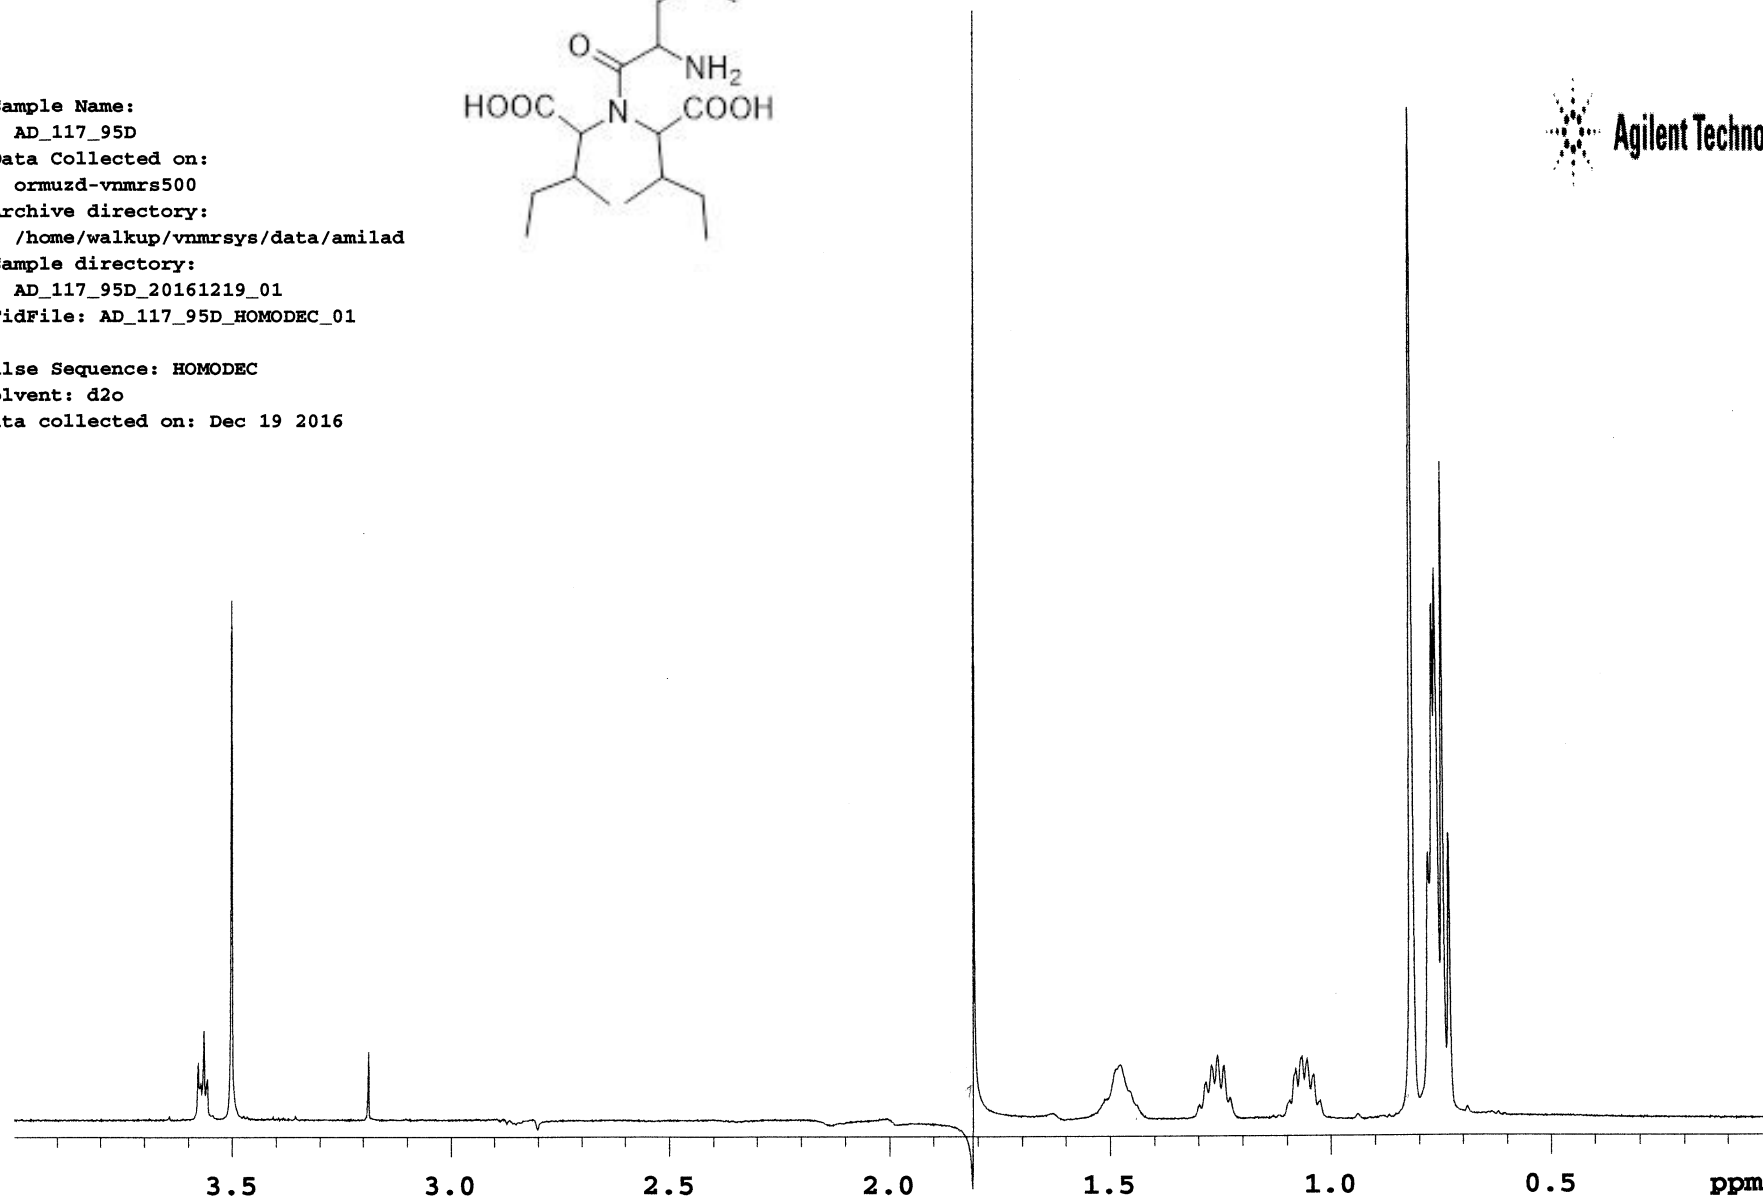

Figure S42. HOMODEC NMR spectrum of 4 D<sub>2</sub>O ( $\delta H = 1.45$ )

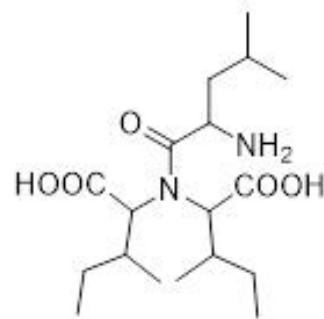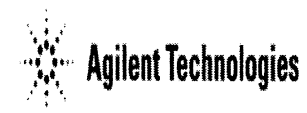

Sample Name:  
AD\_117\_95D  
Data Collected on:  
ormuzd-vnmrs500  
Archive directory:  
/home/walkup/vnmrsys/data/amilad  
Sample directory:  
AD\_117\_95D\_20161219\_01  
FidFile: AD\_117\_95D\_HOMODEC\_01

Pulse Sequence: HOMODEC  
Solvent: d2o  
Data collected on: Dec 19 2016

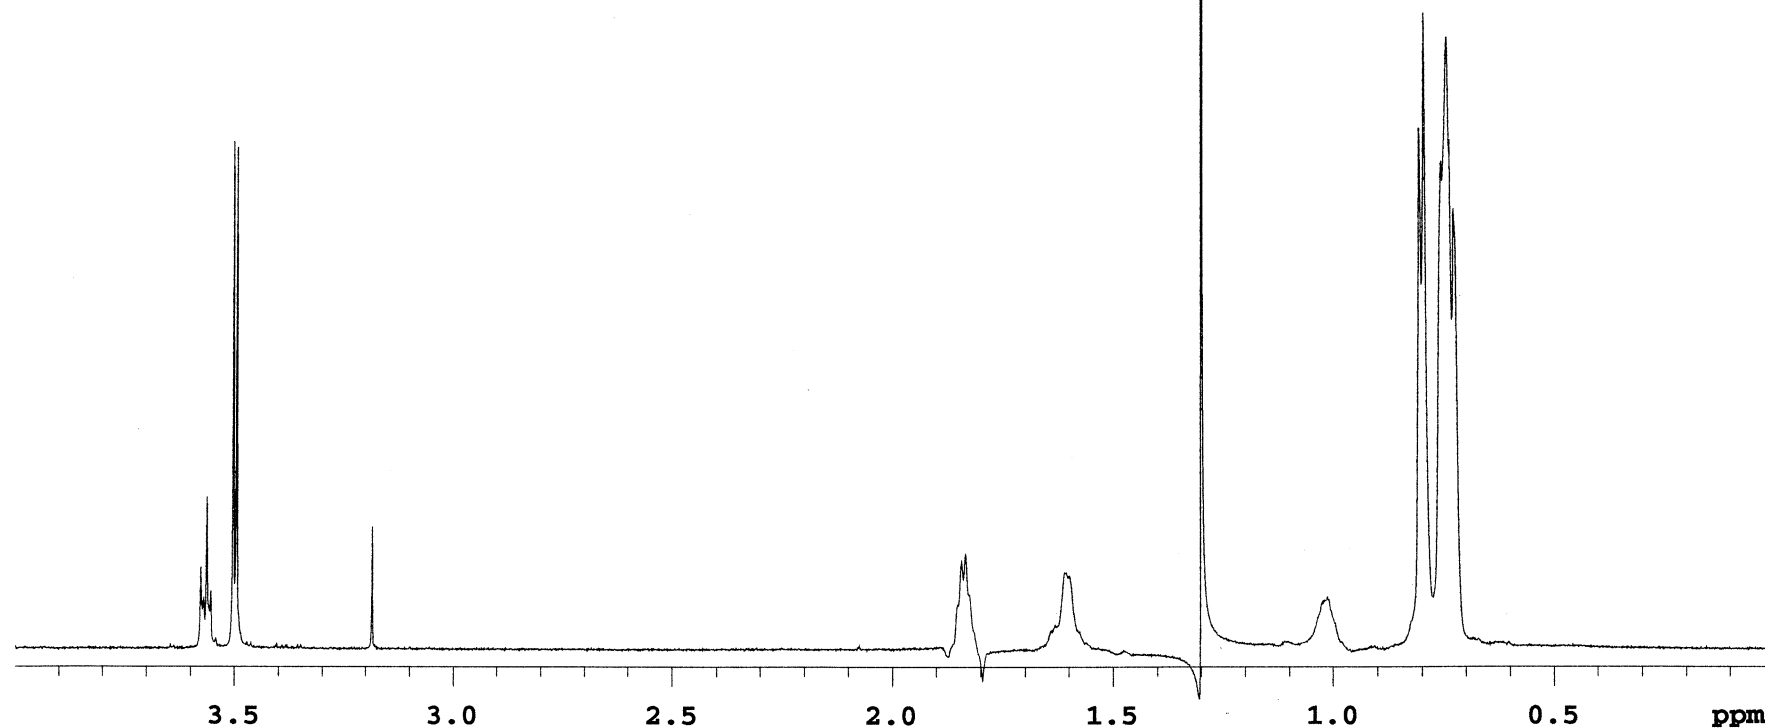

Figure S43. HOMODEC NMR spectrum of 4 D<sub>2</sub>O ( $\delta H = 0.97$ )

Sample Name:  
AD\_117\_95A  
Data Collected on:  
ormuzd-vnmrs500  
Archive directory:  
/home/walkup/vnmrsys/data/amilad  
Sample directory:  
AD\_117\_95A\_20161220\_01  
FidFile: AD\_117\_95A\_HOMODEC\_01

Pulse Sequence: HOMODEC  
Solvent: d2o  
Data collected on: Dec 20 2016

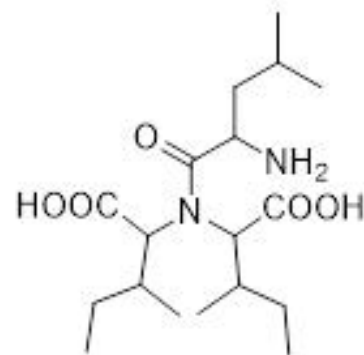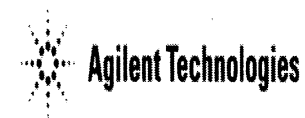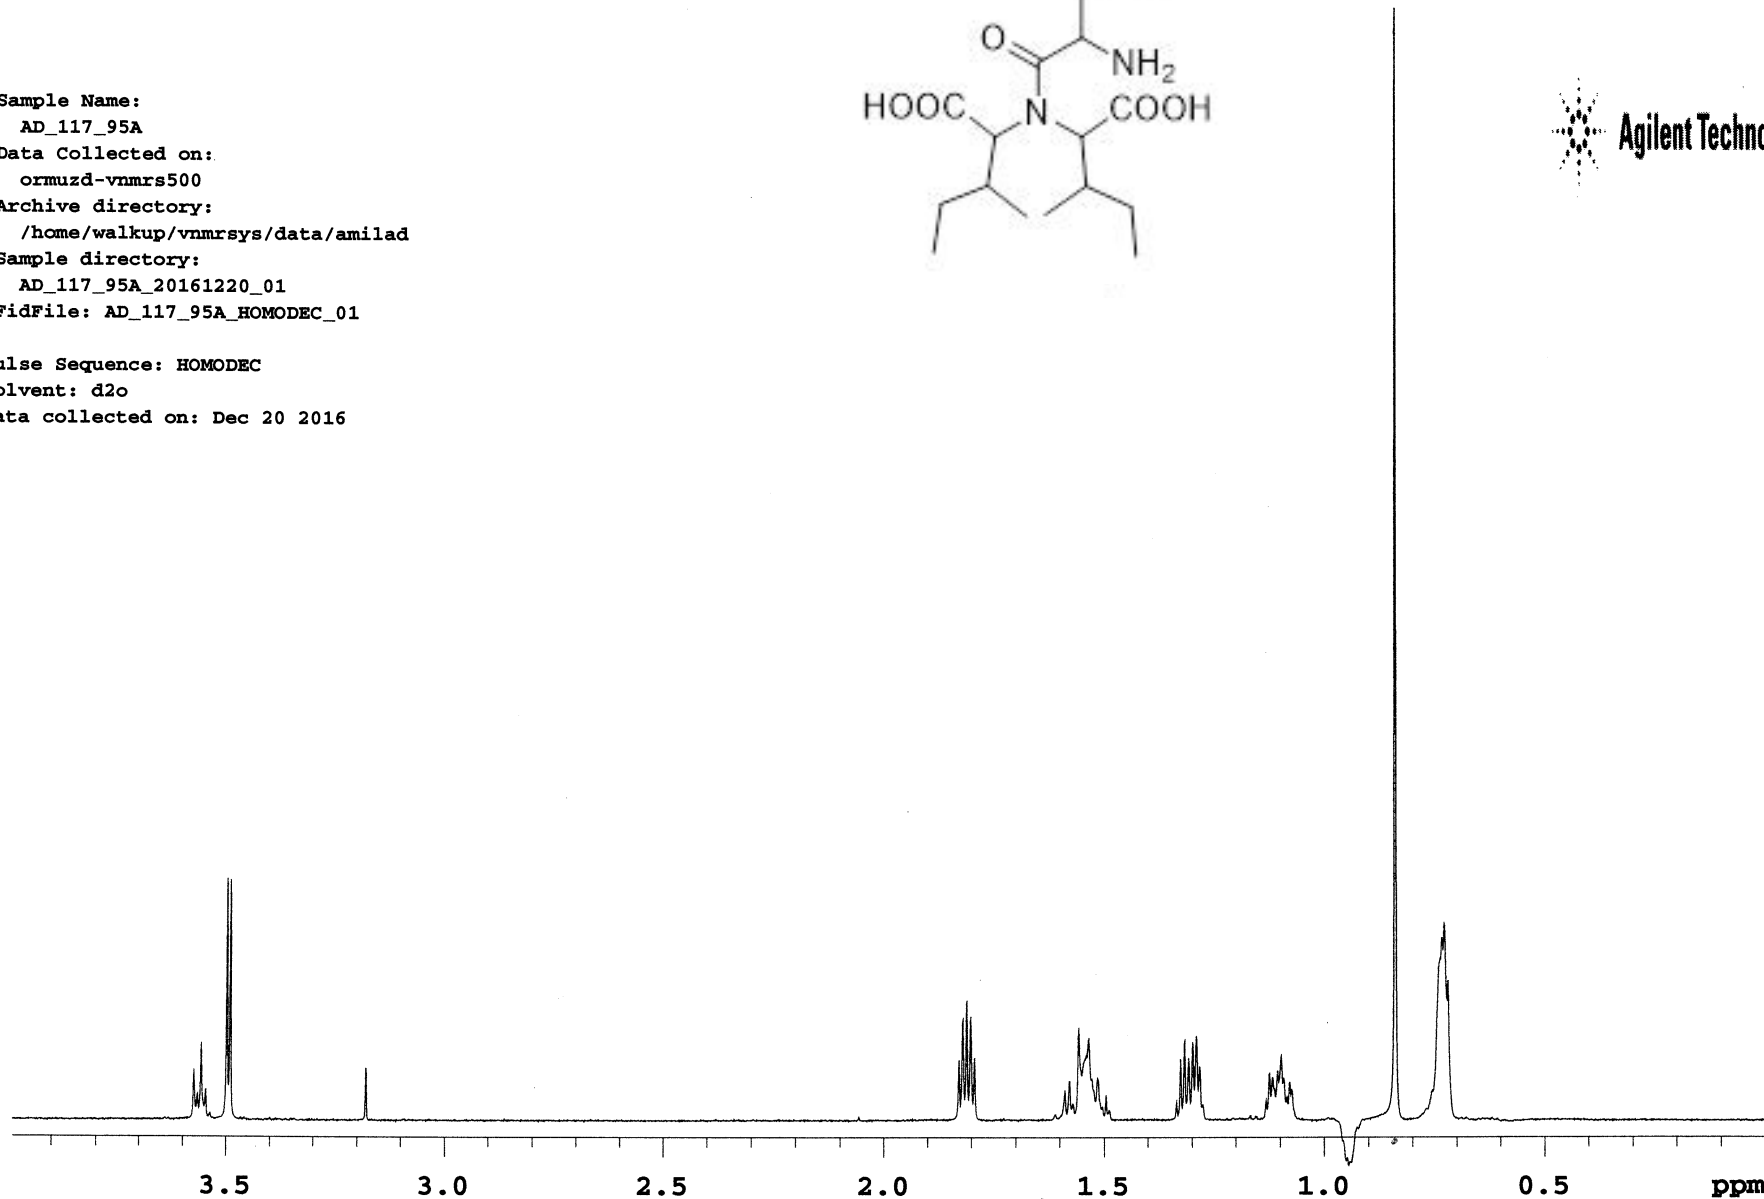

**Figure S44.** HMBC spectrum of **4** in D<sub>2</sub>O

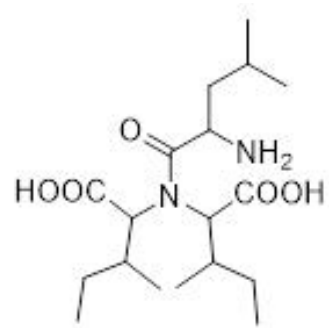

AD\_117\_95A

Sample Name AD\_117\_95A

Date collected 2016-11-20

Pulse sequence gHMBCAD

Solvent d2o

Temperature 25

Spectrometer ormuzd-vnmrs500

Study owner amilad

Operator amilad

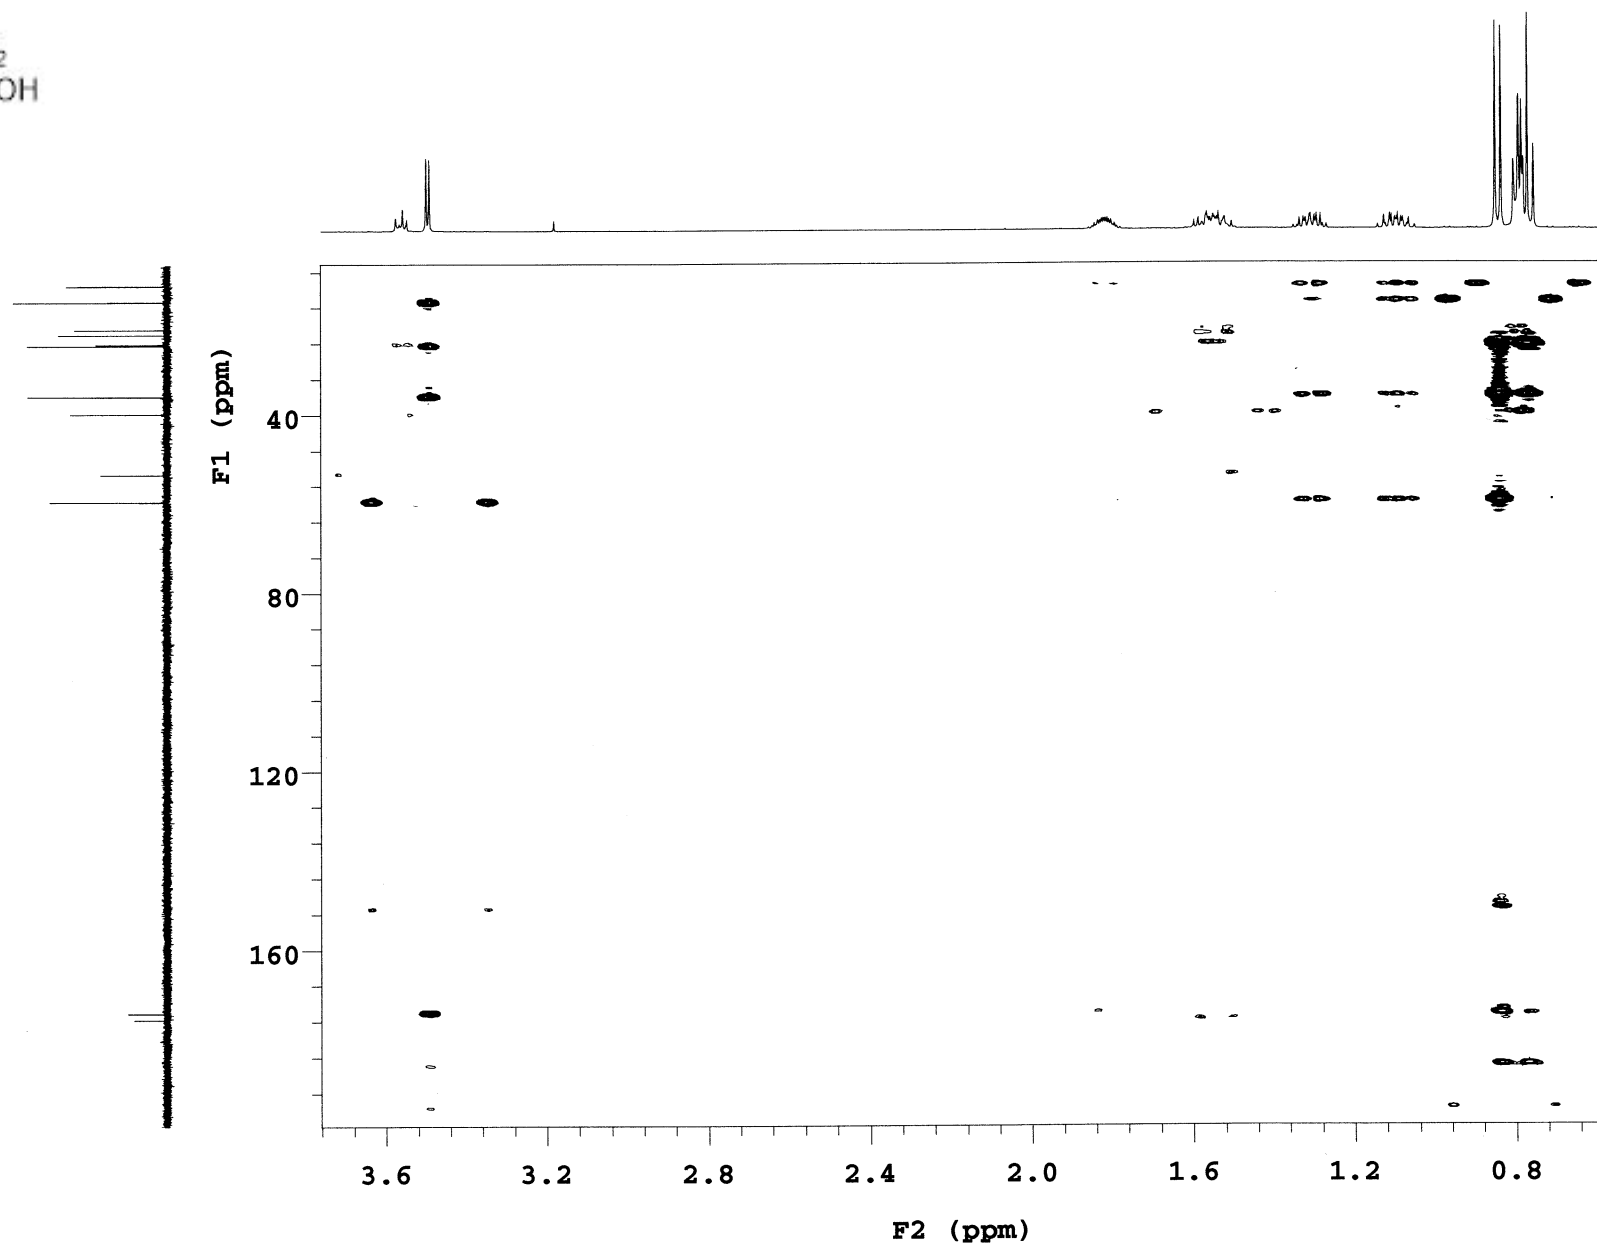

Figure S45. <sup>1</sup>H-<sup>1</sup>H COSY spectrum of 4 in D<sub>2</sub>O

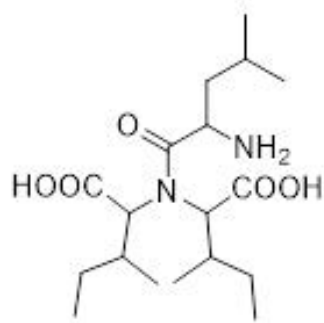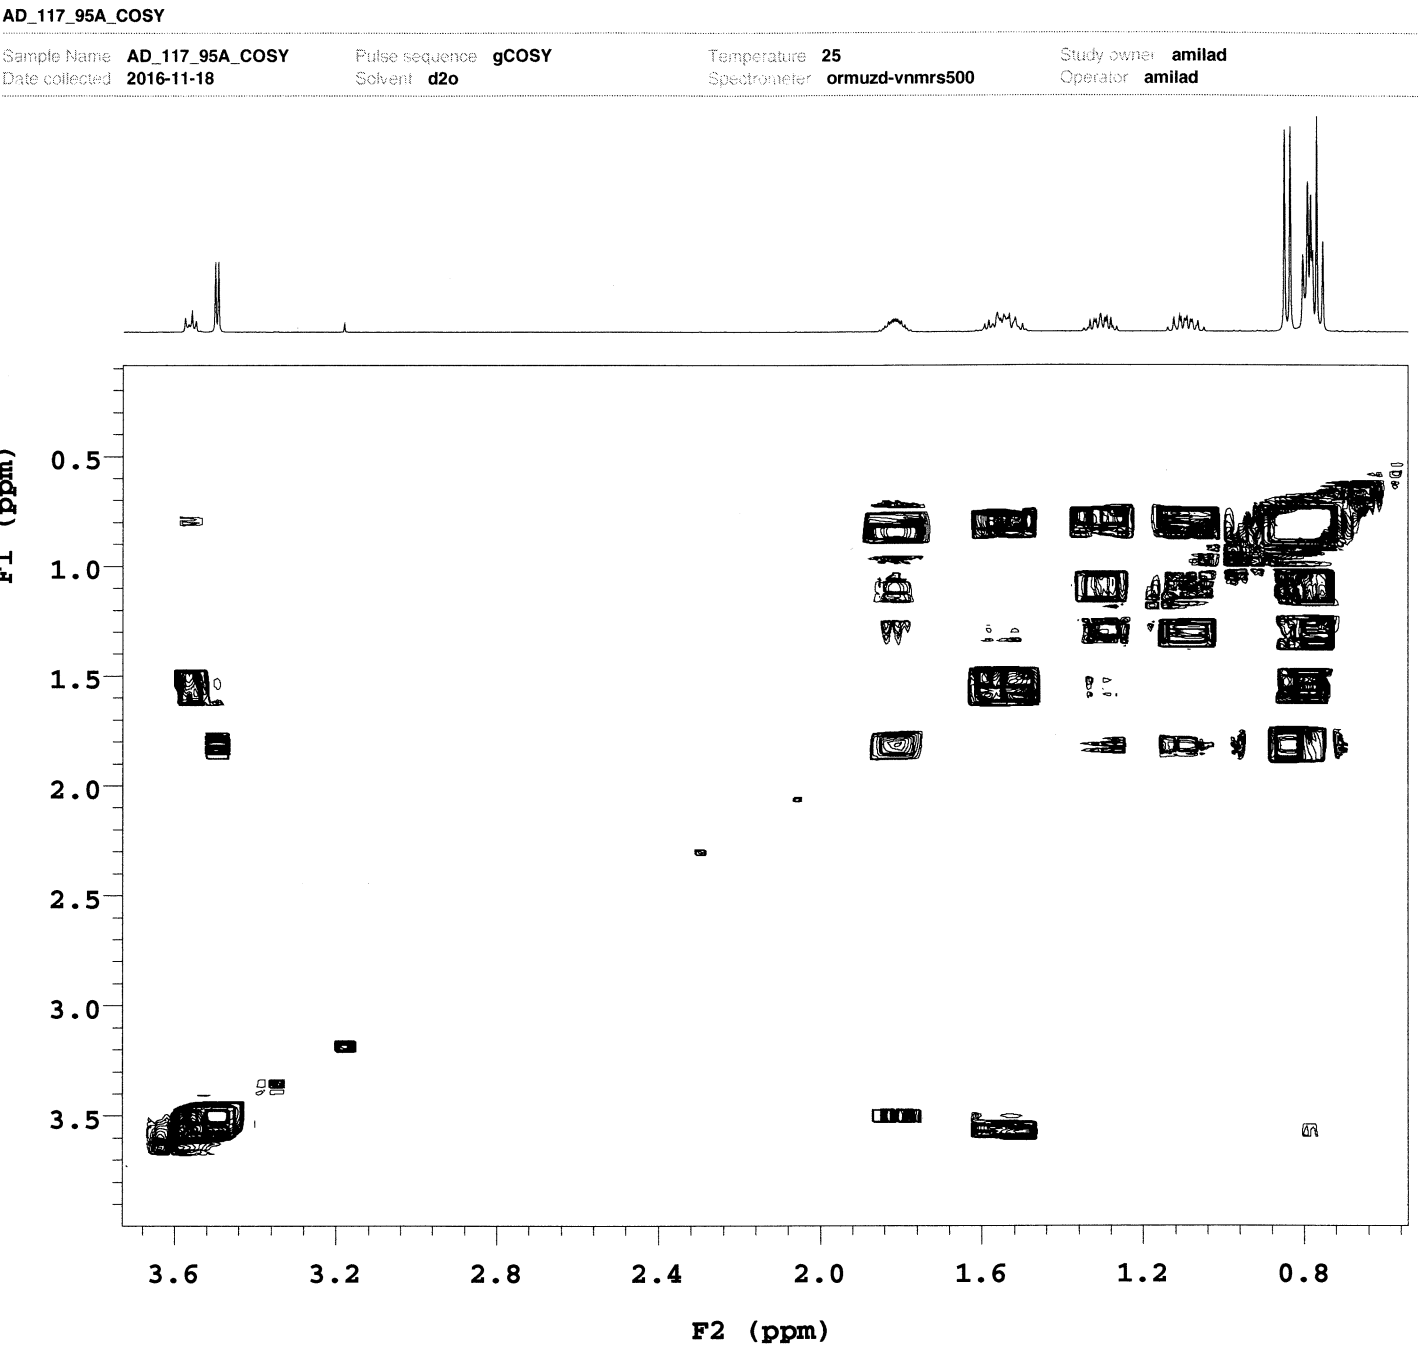

Figure S46. NOESY spectrum of 4 in D<sub>2</sub>O

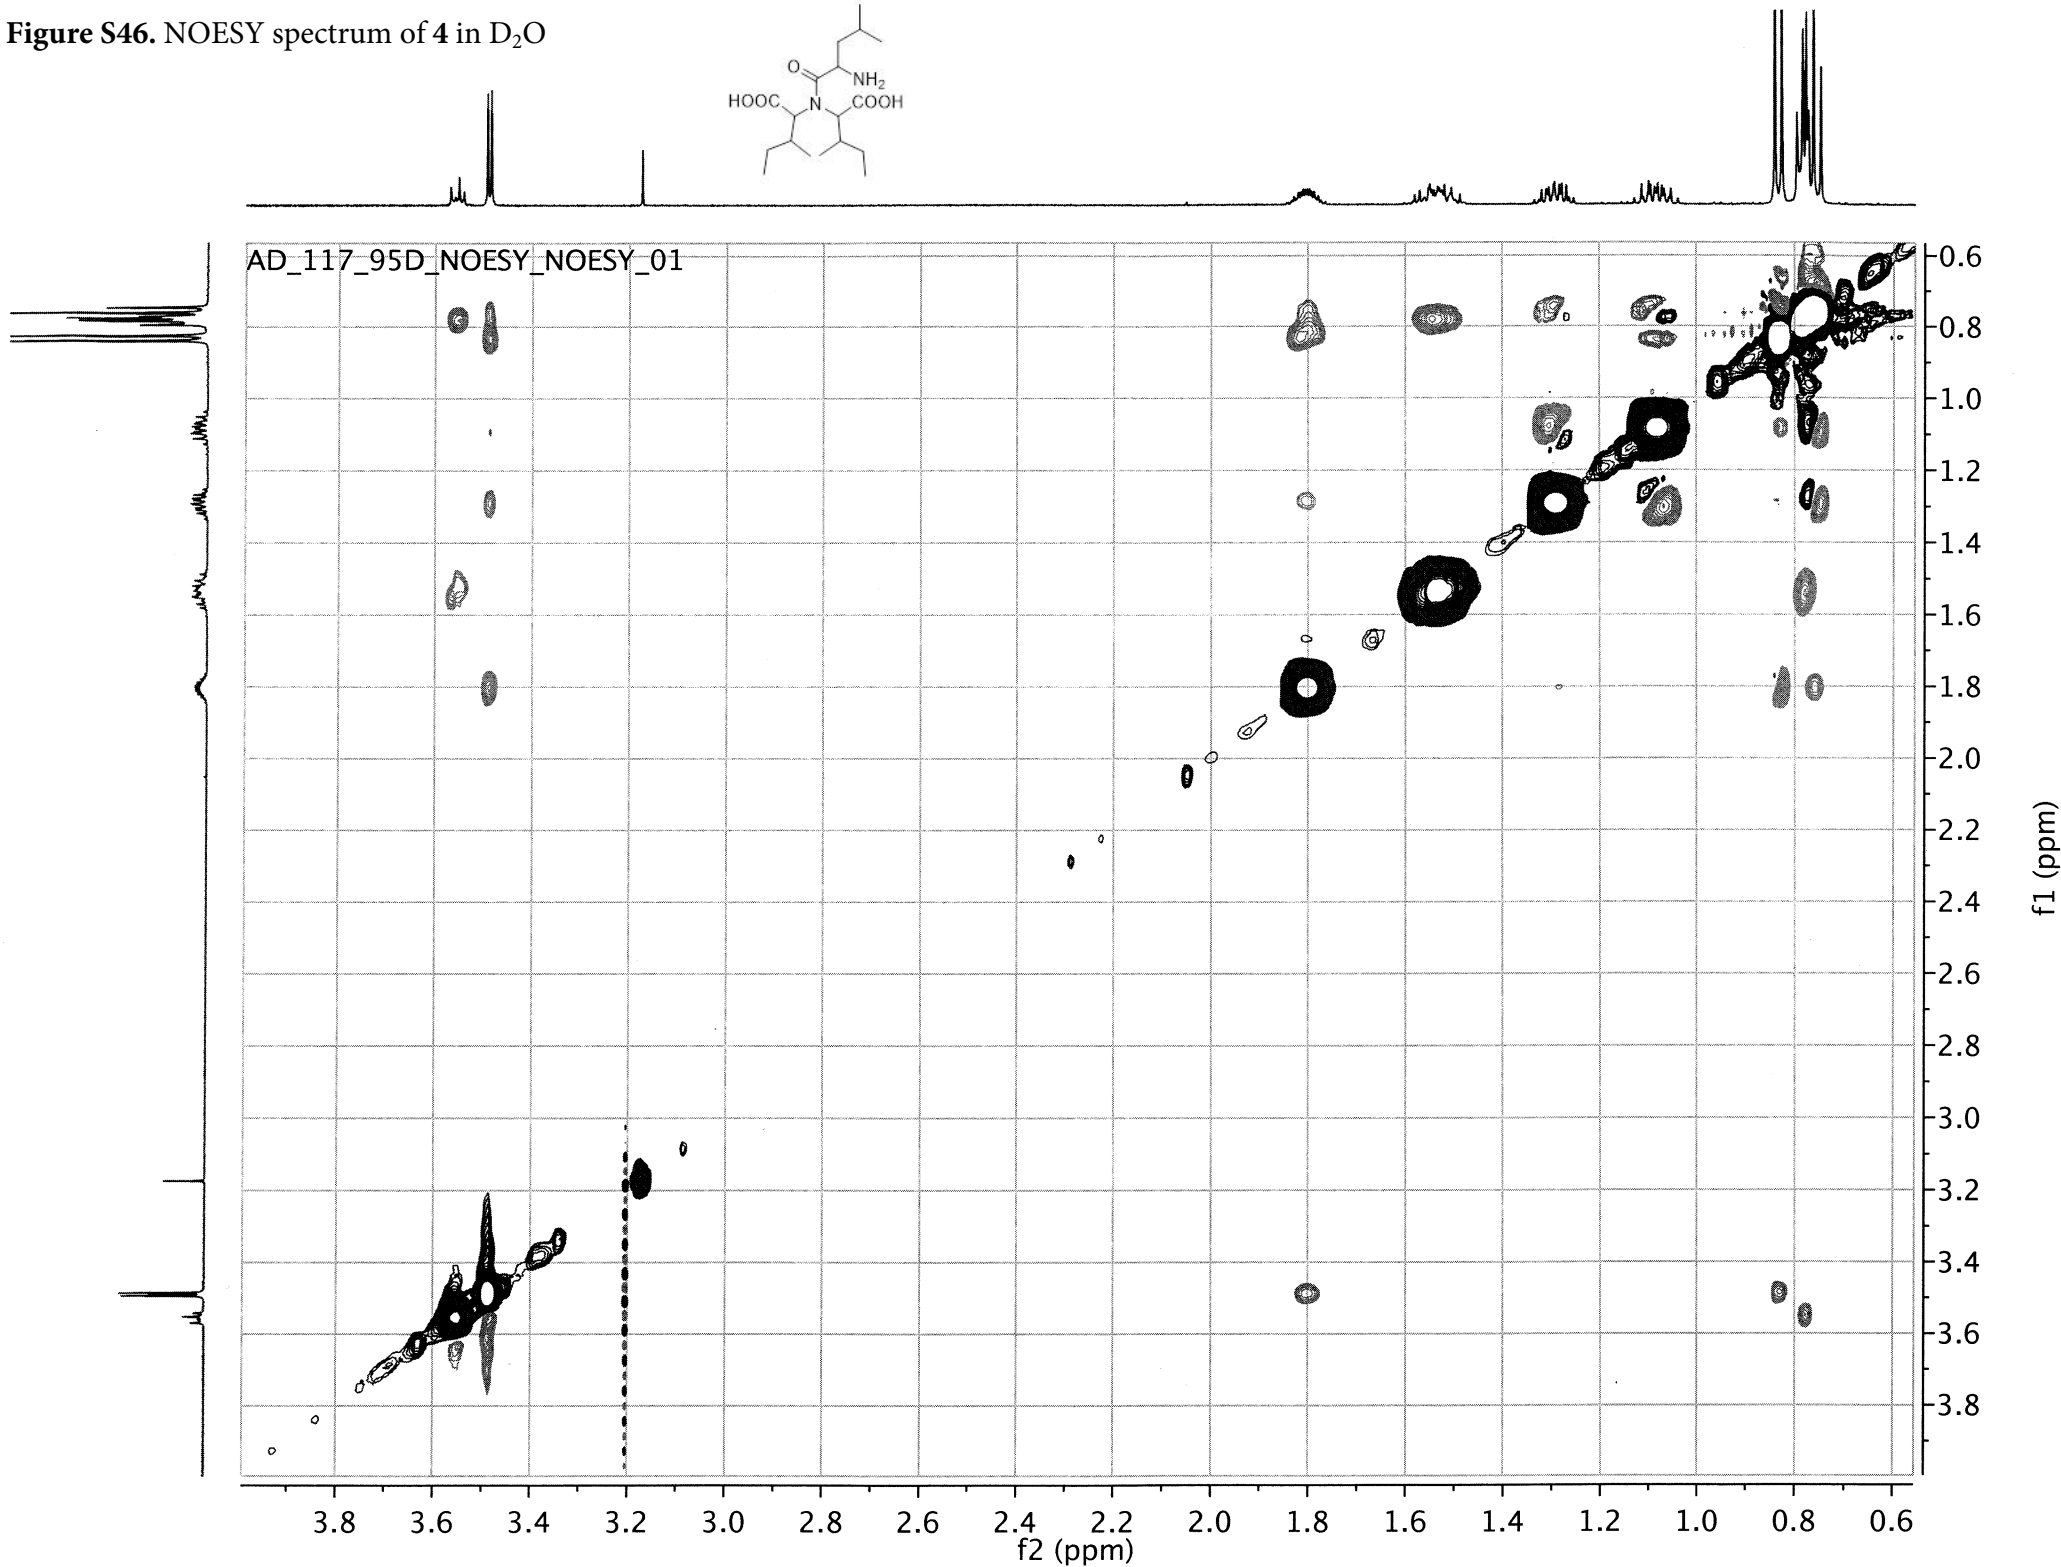



**Table 1.** MTT, LPO and COX assay results for compounds **1-4** isolated from *P. haussknechtii*

|          | Concentration | MTT <sup>a,b</sup><br>(absorbance) | LPO <sup>a,c</sup><br>(fluorescence) | COX-1 <sup>a,d</sup><br>(Inhibition %) | COX-2 <sup>a,d</sup><br>(Inhibition %) |
|----------|---------------|------------------------------------|--------------------------------------|----------------------------------------|----------------------------------------|
| <b>1</b> | 146.2 $\mu$ M | 0.605 $\pm$ 0.02                   | ND <sup>e</sup>                      | ND <sup>e</sup>                        | ND <sup>e</sup>                        |
|          | 73.1 $\mu$ M  | 0.251 $\pm$ 0.03                   | 53.6 $\pm$ 2.1                       | 63.7 $\pm$ 3.0                         | 60.1 $\pm$ 0.9                         |
|          | 36.5 $\mu$ M  | 0.134 $\pm$ 0.01                   | 37.4 $\pm$ 1.6                       | 49.4 $\pm$ 0.4                         | 42.1 $\pm$ 0.3                         |
|          | 18.3 $\mu$ M  | 0.065 $\pm$ 0.01                   | 22.4 $\pm$ 0.8                       | 28.6 $\pm$ 0.4                         | 29.8 $\pm$ 0.3                         |
|          | 9.12 $\mu$ M  | ND <sup>e</sup>                    | 15.9 $\pm$ 2.2                       | 10.8 $\pm$ 2.7                         | 14.1 $\pm$ 2.8                         |
| <b>2</b> | 145.3 $\mu$ M | 0.528 $\pm$ 0.04                   | 62.6 $\pm$ 2.4                       | ND <sup>e</sup>                        | ND <sup>e</sup>                        |
|          | 72.6 $\mu$ M  | 0.259 $\pm$ 0.02                   | 46.2 $\pm$ 1.8                       | 55.8 $\pm$ 0.8                         | 53.9 $\pm$ 3.7                         |
|          | 36.3 $\mu$ M  | 0.160 $\pm$ 0.03                   | 24.7 $\pm$ 1.6                       | 45.2 $\pm$ 2.7                         | 40.7 $\pm$ 0.3                         |
|          | 18.2 $\mu$ M  | 0.081 $\pm$ 0.03                   | 17.9 $\pm$ 0.9                       | 24.6 $\pm$ 0.1                         | 33.7 $\pm$ 1.3                         |
|          | 9.07 $\mu$ M  | ND <sup>e</sup>                    | ND <sup>e</sup>                      | 21.1 $\pm$ 1.4                         | 23.9 $\pm$ 0.6                         |
| <b>3</b> | 178.6 $\mu$ M | ND <sup>e</sup>                    | 60.3 $\pm$ 2.2                       | ND <sup>e</sup>                        | ND <sup>e</sup>                        |
|          | 89.3 $\mu$ M  | 0.651 $\pm$ 0.02                   | 42.5 $\pm$ 1.5                       | 18.2 $\pm$ 0.3                         | 4.8 $\pm$ 1.7                          |
|          | 44.6 $\mu$ M  | 0.328 $\pm$ 0.05                   | 26.1 $\pm$ 1.4                       | ND <sup>e</sup>                        | ND <sup>e</sup>                        |
|          | 22.3 $\mu$ M  | 0.166 $\pm$ 0.03                   | 19.5 $\pm$ 0.8                       | ND <sup>e</sup>                        | ND <sup>e</sup>                        |
|          | 11.1 $\mu$ M  | 0.054 $\pm$ 0.01                   | ND <sup>e</sup>                      | ND <sup>e</sup>                        | ND <sup>e</sup>                        |
| <b>4</b> | 139.6 $\mu$ M | ND <sup>e</sup>                    | ND <sup>e</sup>                      | ND <sup>e</sup>                        | ND <sup>e</sup>                        |
|          | 69.8 $\mu$ M  | 0.680 $\pm$ 0.04                   | 61.5 $\pm$ 3.1                       | 46.1 $\pm$ 0.3                         | 75.5 $\pm$ 3.6                         |
|          | 34.9 $\mu$ M  | 0.370 $\pm$ 0.05                   | 44.5 $\pm$ 2.7                       | 37.4 $\pm$ 2.7                         | 49.1 $\pm$ 0.2                         |
|          | 17.5 $\mu$ M  | 0.217 $\pm$ 0.05                   | 29.5 $\pm$ 0.8                       | 21.1 $\pm$ 0.3                         | 33.6 $\pm$ 1.1                         |
|          | 8.71 $\mu$ M  | 0.127 $\pm$ 0.06                   | 19.2 $\pm$ 1.4                       | 14.9 $\pm$ 0.1                         | 22.2 $\pm$ 1.5                         |

<sup>a</sup>Values are expressed as mean  $\pm$  SEM (n = 2). <sup>b</sup>Positive controls vitamin C and TBHQ gave absorbance values of 0.49 and 0.50 at 142.1 and 150.4  $\mu$ M, respectively. <sup>c</sup>Commercial antioxidants BHT, BHA and TBHQ with IC<sub>50</sub> values of 10  $\mu$ M, 6.9  $\mu$ M and 5  $\mu$ M, respectively.

<sup>d</sup>The standards aspirin, ibuprofen and naproxen with IC<sub>50</sub> values of 600  $\mu$ M, 72.8  $\mu$ M and 52.2  $\mu$ M, respectively for the inhibition of COX-1 enzyme activity and Celebrex® and naproxen with IC<sub>50</sub> values of 1.3  $\mu$ M and 52.2  $\mu$ M, respectively for the inhibition of COX-2 enzyme activity.

<sup>e</sup>Data not available.

**Figure S47.** Chemical structures of known compounds

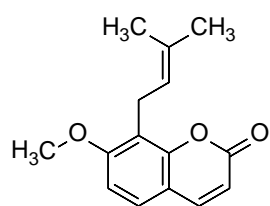

Osthol

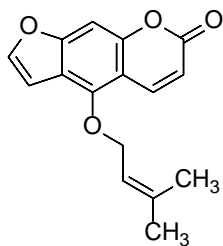

Isoimperatorin

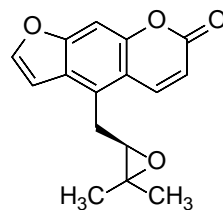

Oxypeucedanin

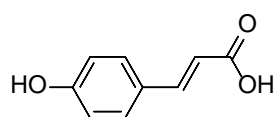

p-coumaric acid

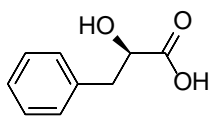

3-phenyllactic acid

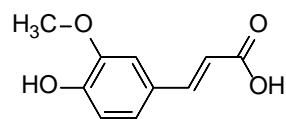

ferulic acid

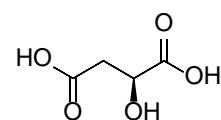

malic acid

**Figure S48.**  $^1\text{H}$  NMR spectrum of isoimperatorin in  $\text{CDCl}_3$

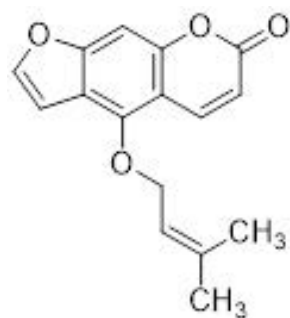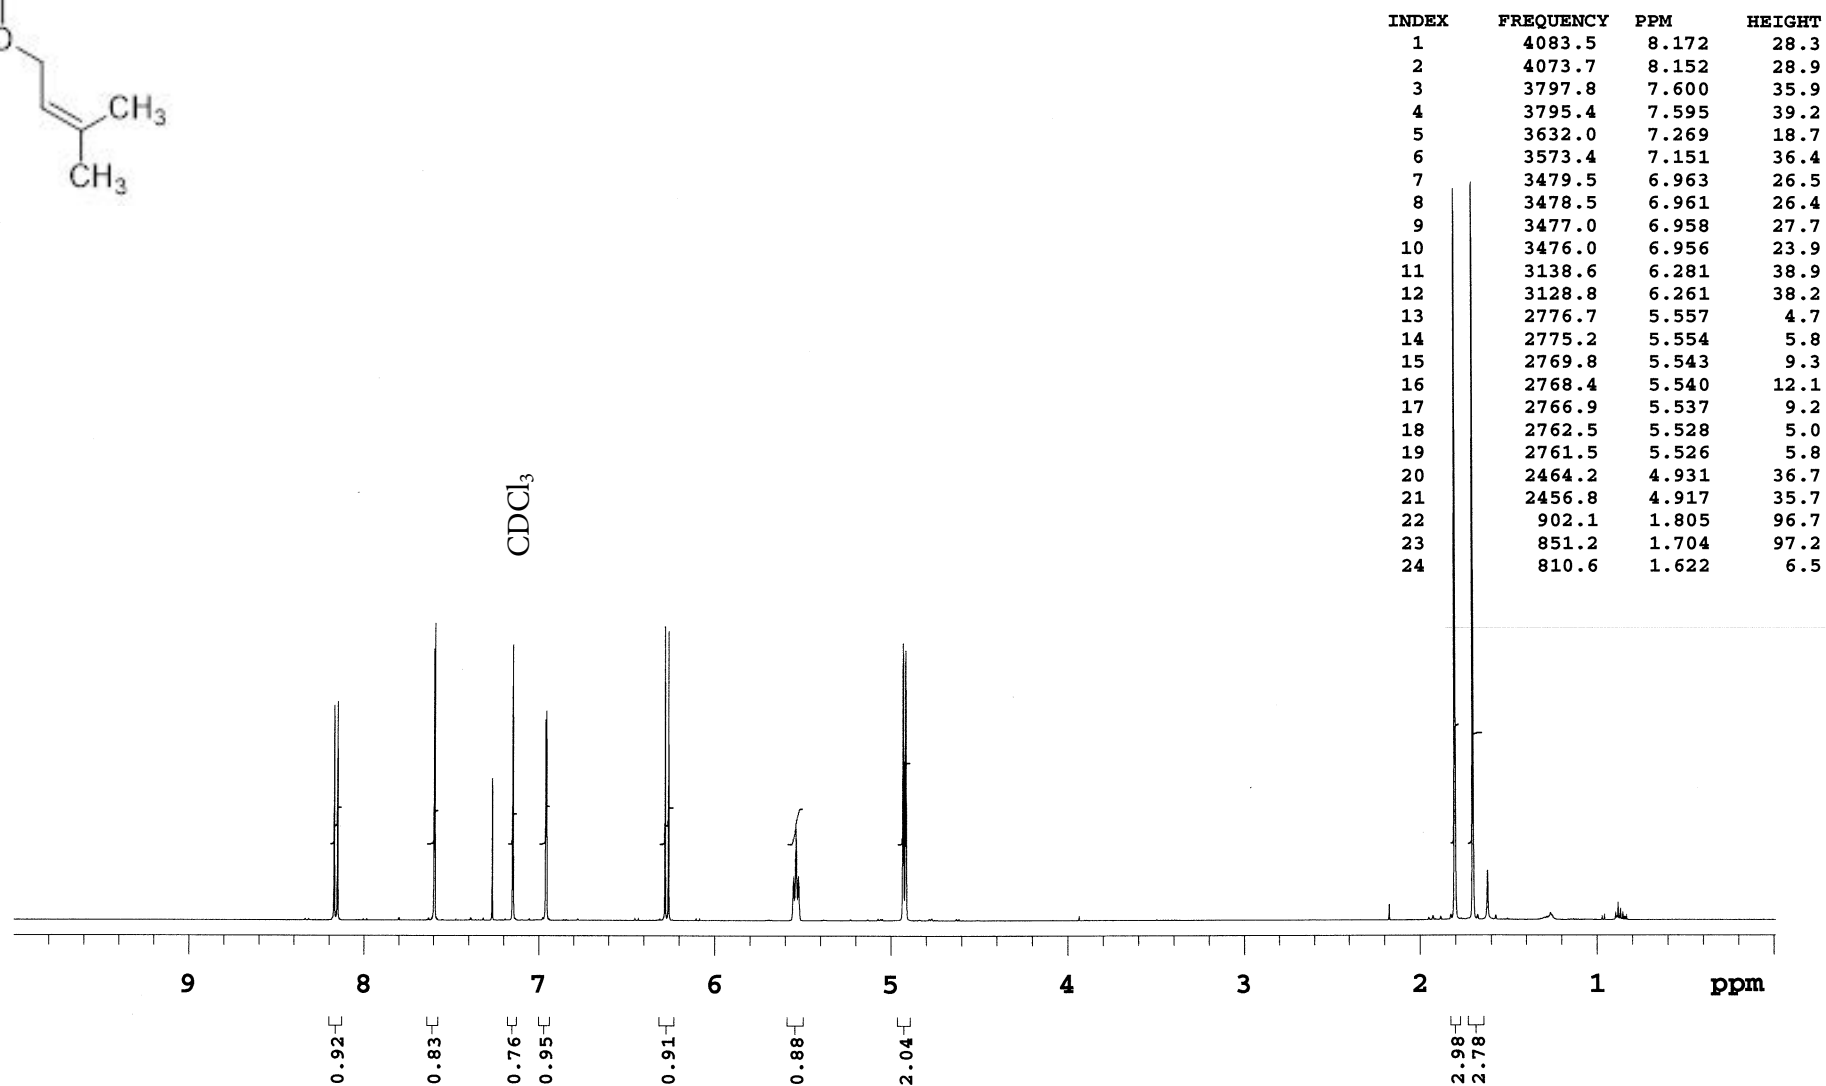

**Figure S49.**  $^{13}\text{C}$  NMR spectrum of isoimperatorin in  $\text{CDCl}_3$

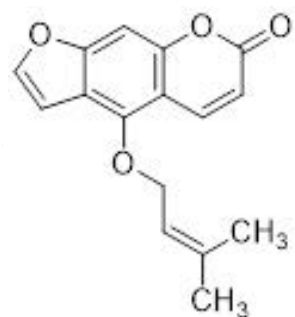

$\text{CDCl}_3$

| INDEX | FREQUENCY | PPM     | HEIGHT |
|-------|-----------|---------|--------|
| 1     | 20267.4   | 161.302 | 26.2   |
| 2     | 19864.0   | 158.092 | 30.9   |
| 3     | 19176.4   | 152.619 | 12.8   |
| 4     | 18711.0   | 148.915 | 24.3   |
| 5     | 18201.7   | 144.862 | 108.5  |
| 6     | 17569.5   | 139.830 | 38.9   |
| 7     | 17538.0   | 139.580 | 69.7   |
| 8     | 14958.3   | 119.049 | 72.0   |
| 9     | 14339.4   | 114.123 | 14.0   |
| 10    | 14136.2   | 112.506 | 85.0   |
| 11    | 13501.1   | 107.451 | 22.2   |
| 12    | 13197.8   | 105.038 | 104.9  |
| 13    | 11832.2   | 94.169  | 76.4   |
| 14    | 9707.4    | 77.258  | 147.6  |
| 15    | 9700.7    | 77.205  | 7.5    |
| 16    | 9674.9    | 77.000  | 130.7  |
| 17    | 9643.5    | 76.750  | 149.5  |
| 18    | 8755.6    | 69.683  | 91.2   |
| 19    | 3242.4    | 25.805  | 64.7   |
| 20    | 2288.7    | 18.215  | 32.5   |

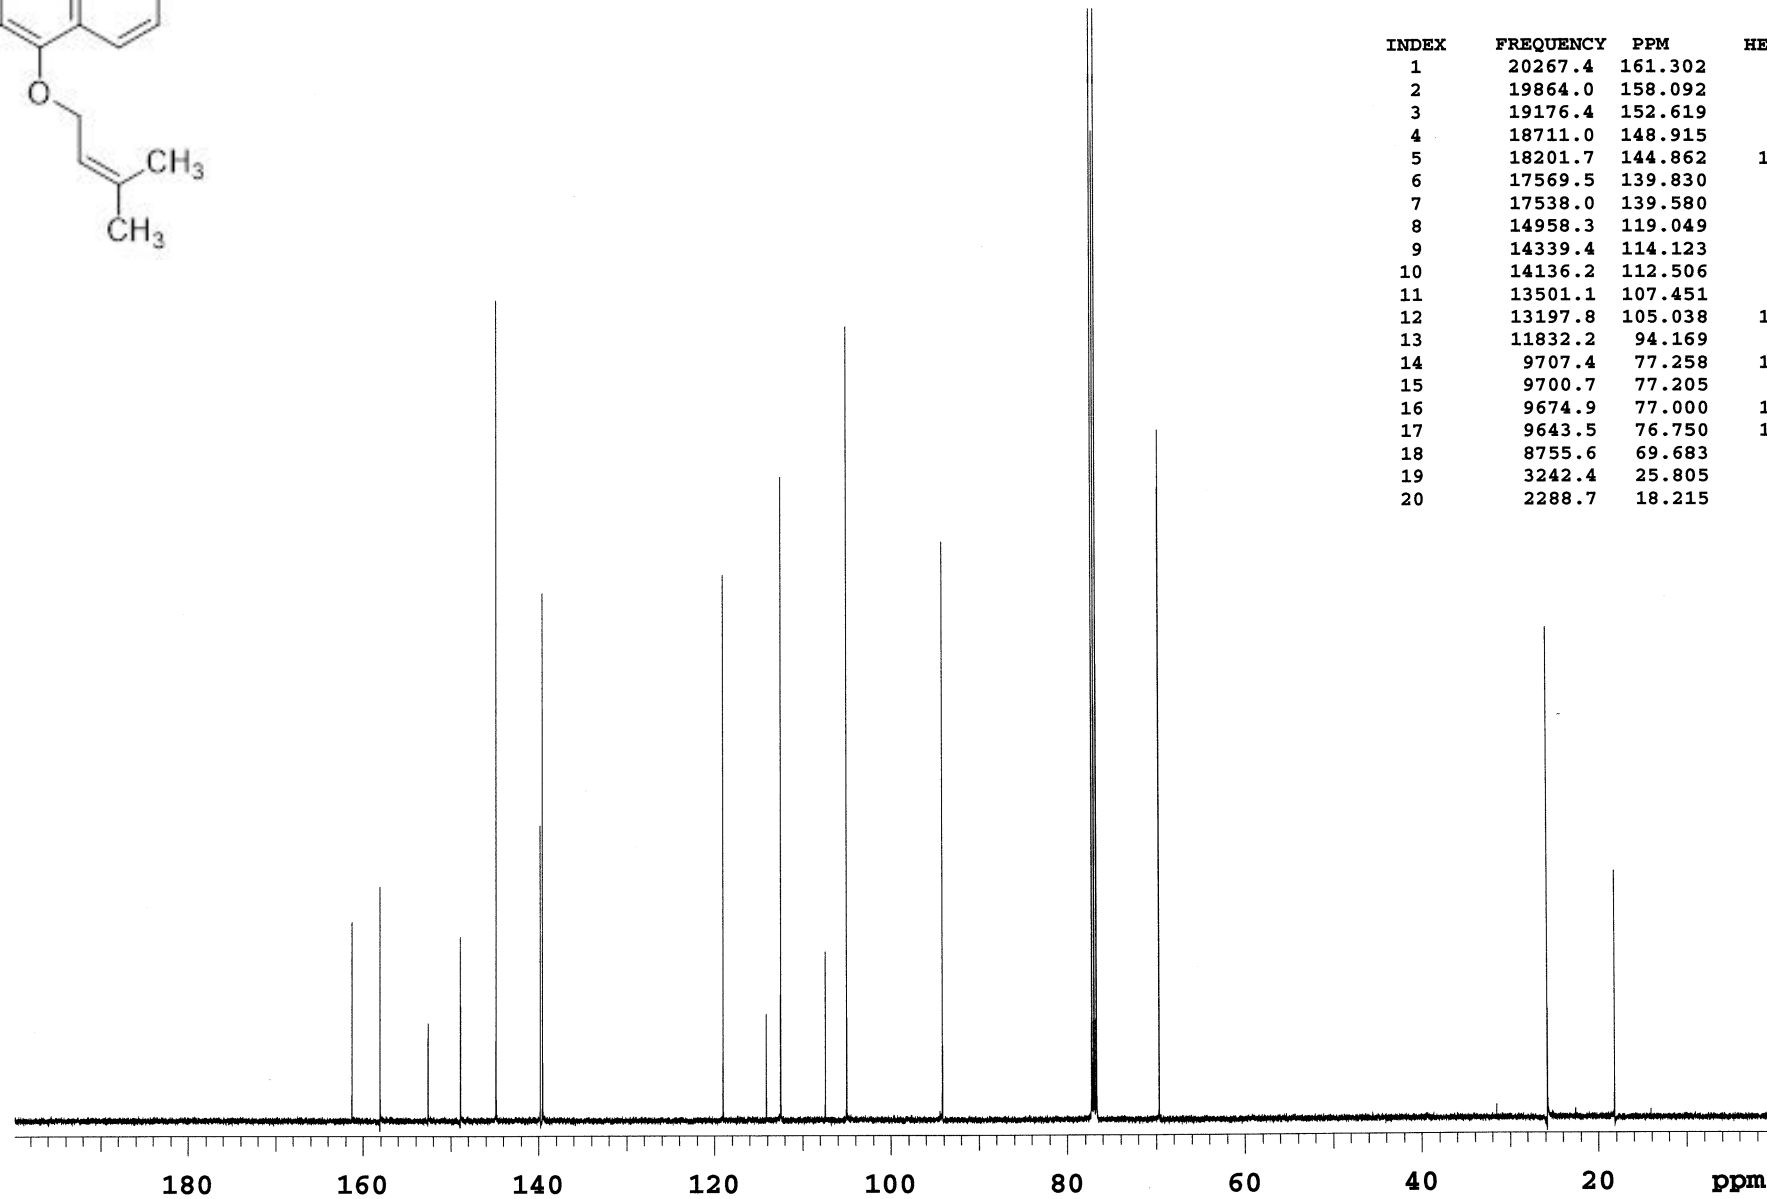

**Figure S50.** HSQC spectrum of isoimperatorin in CDCl<sub>3</sub>

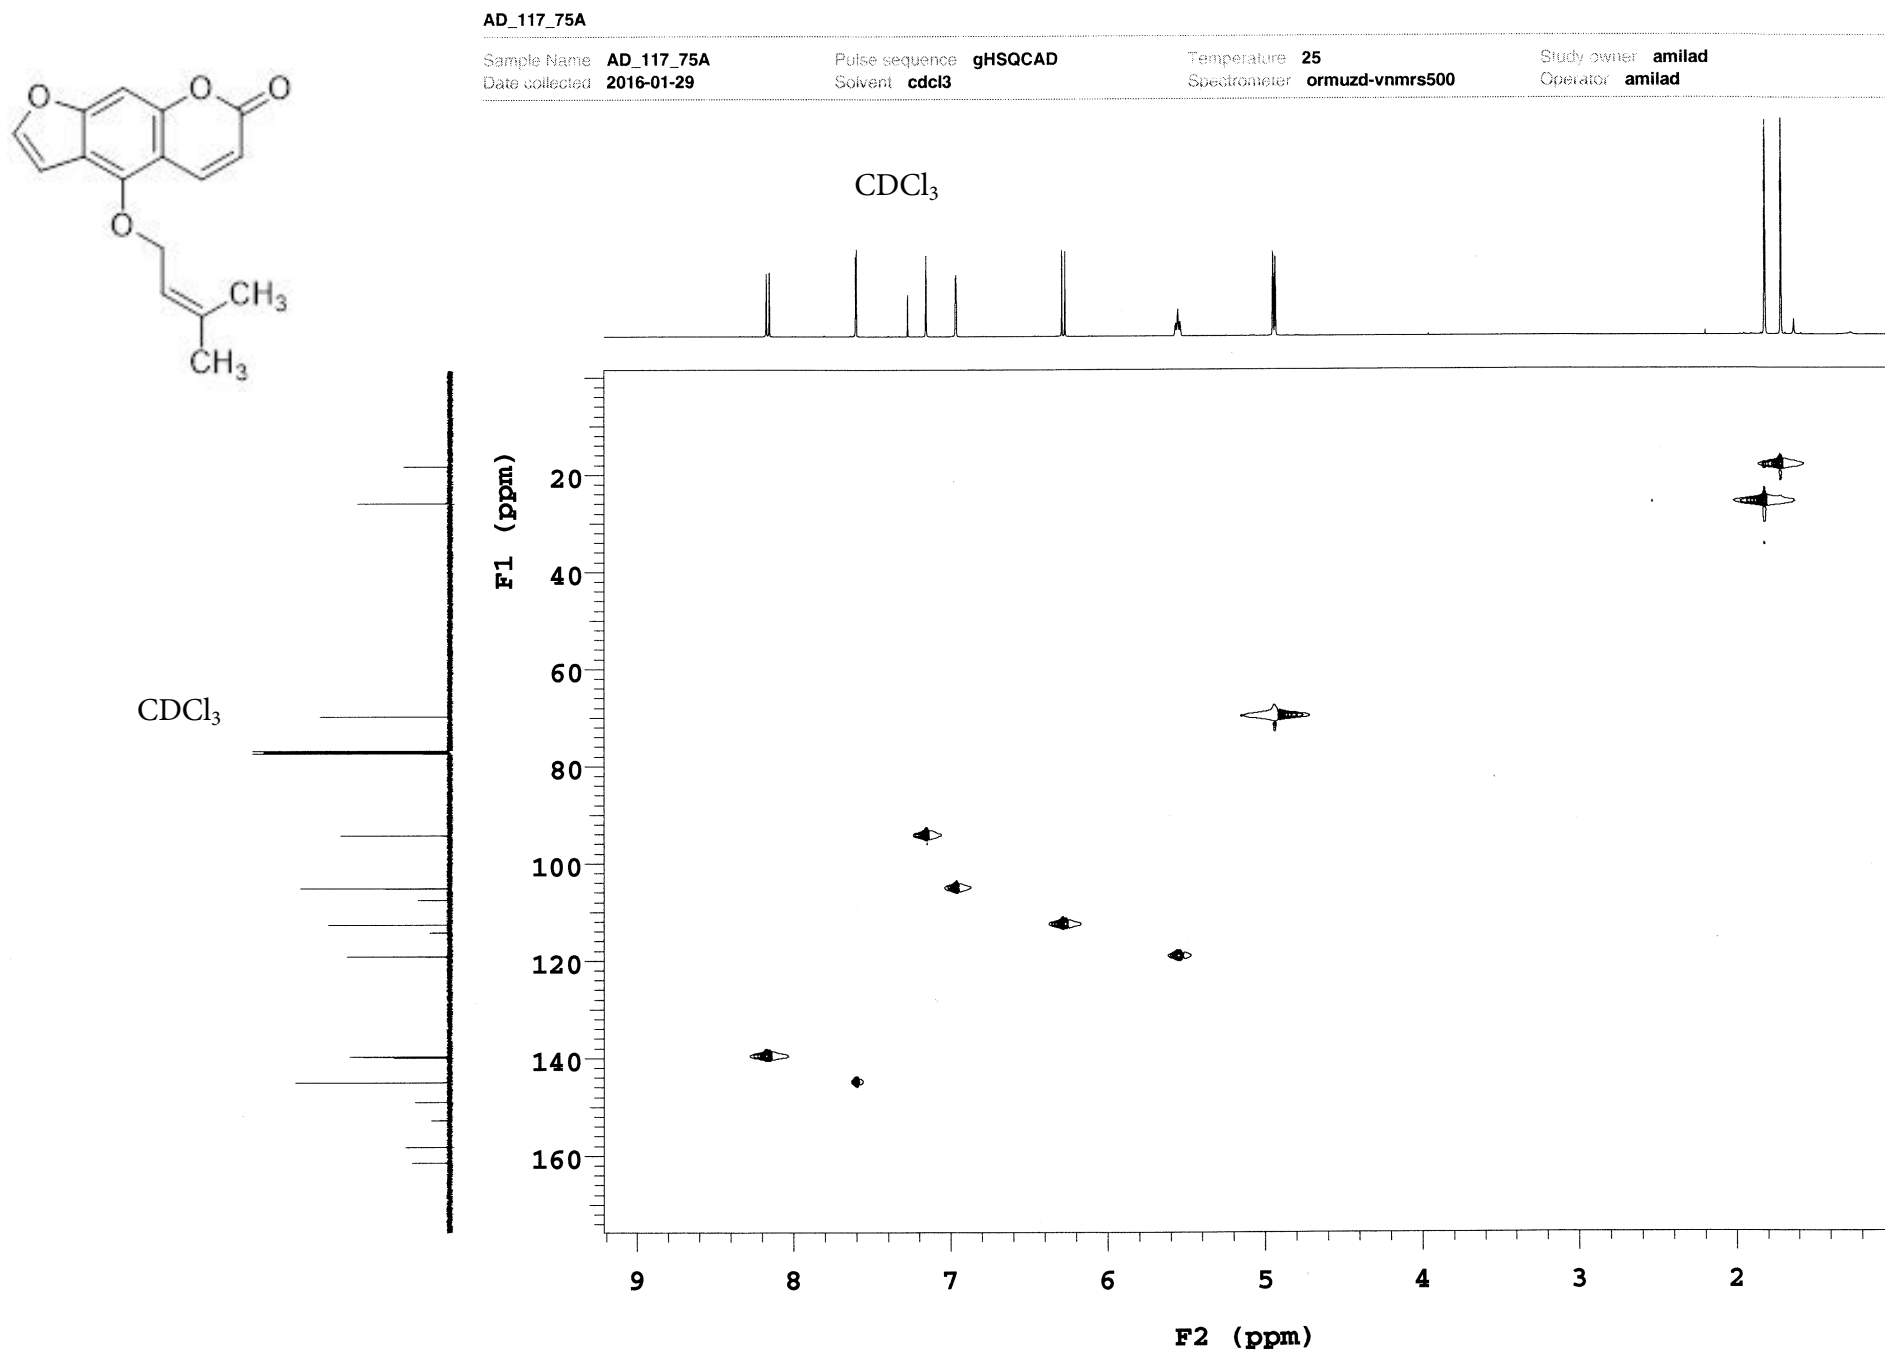

Figure S51. <sup>1</sup>H NMR spectrum of osthol in CDCl<sub>3</sub>

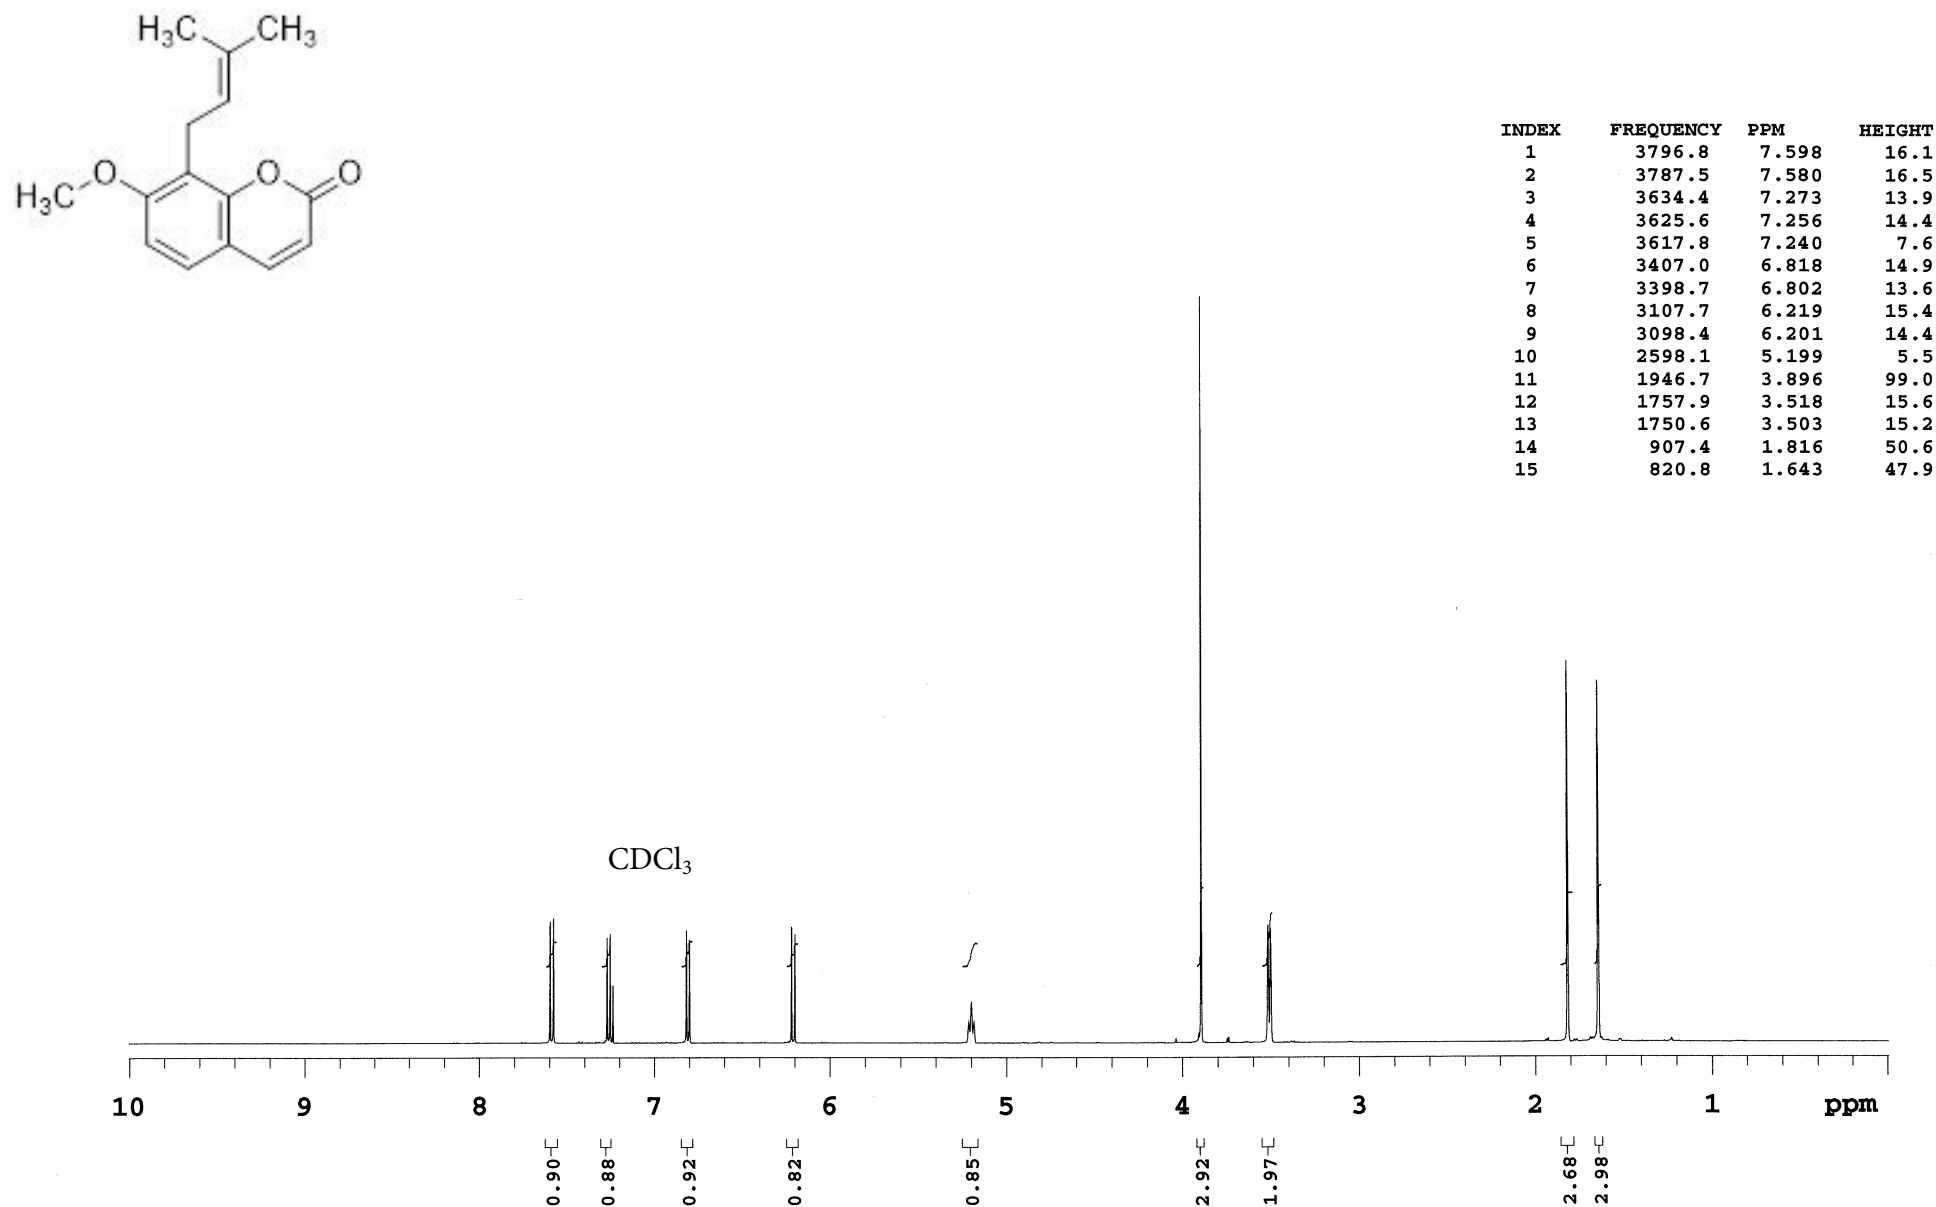

**Figure S52.**  $^{13}\text{C}$  NMR spectrum of osthol in  $\text{CDCl}_3$

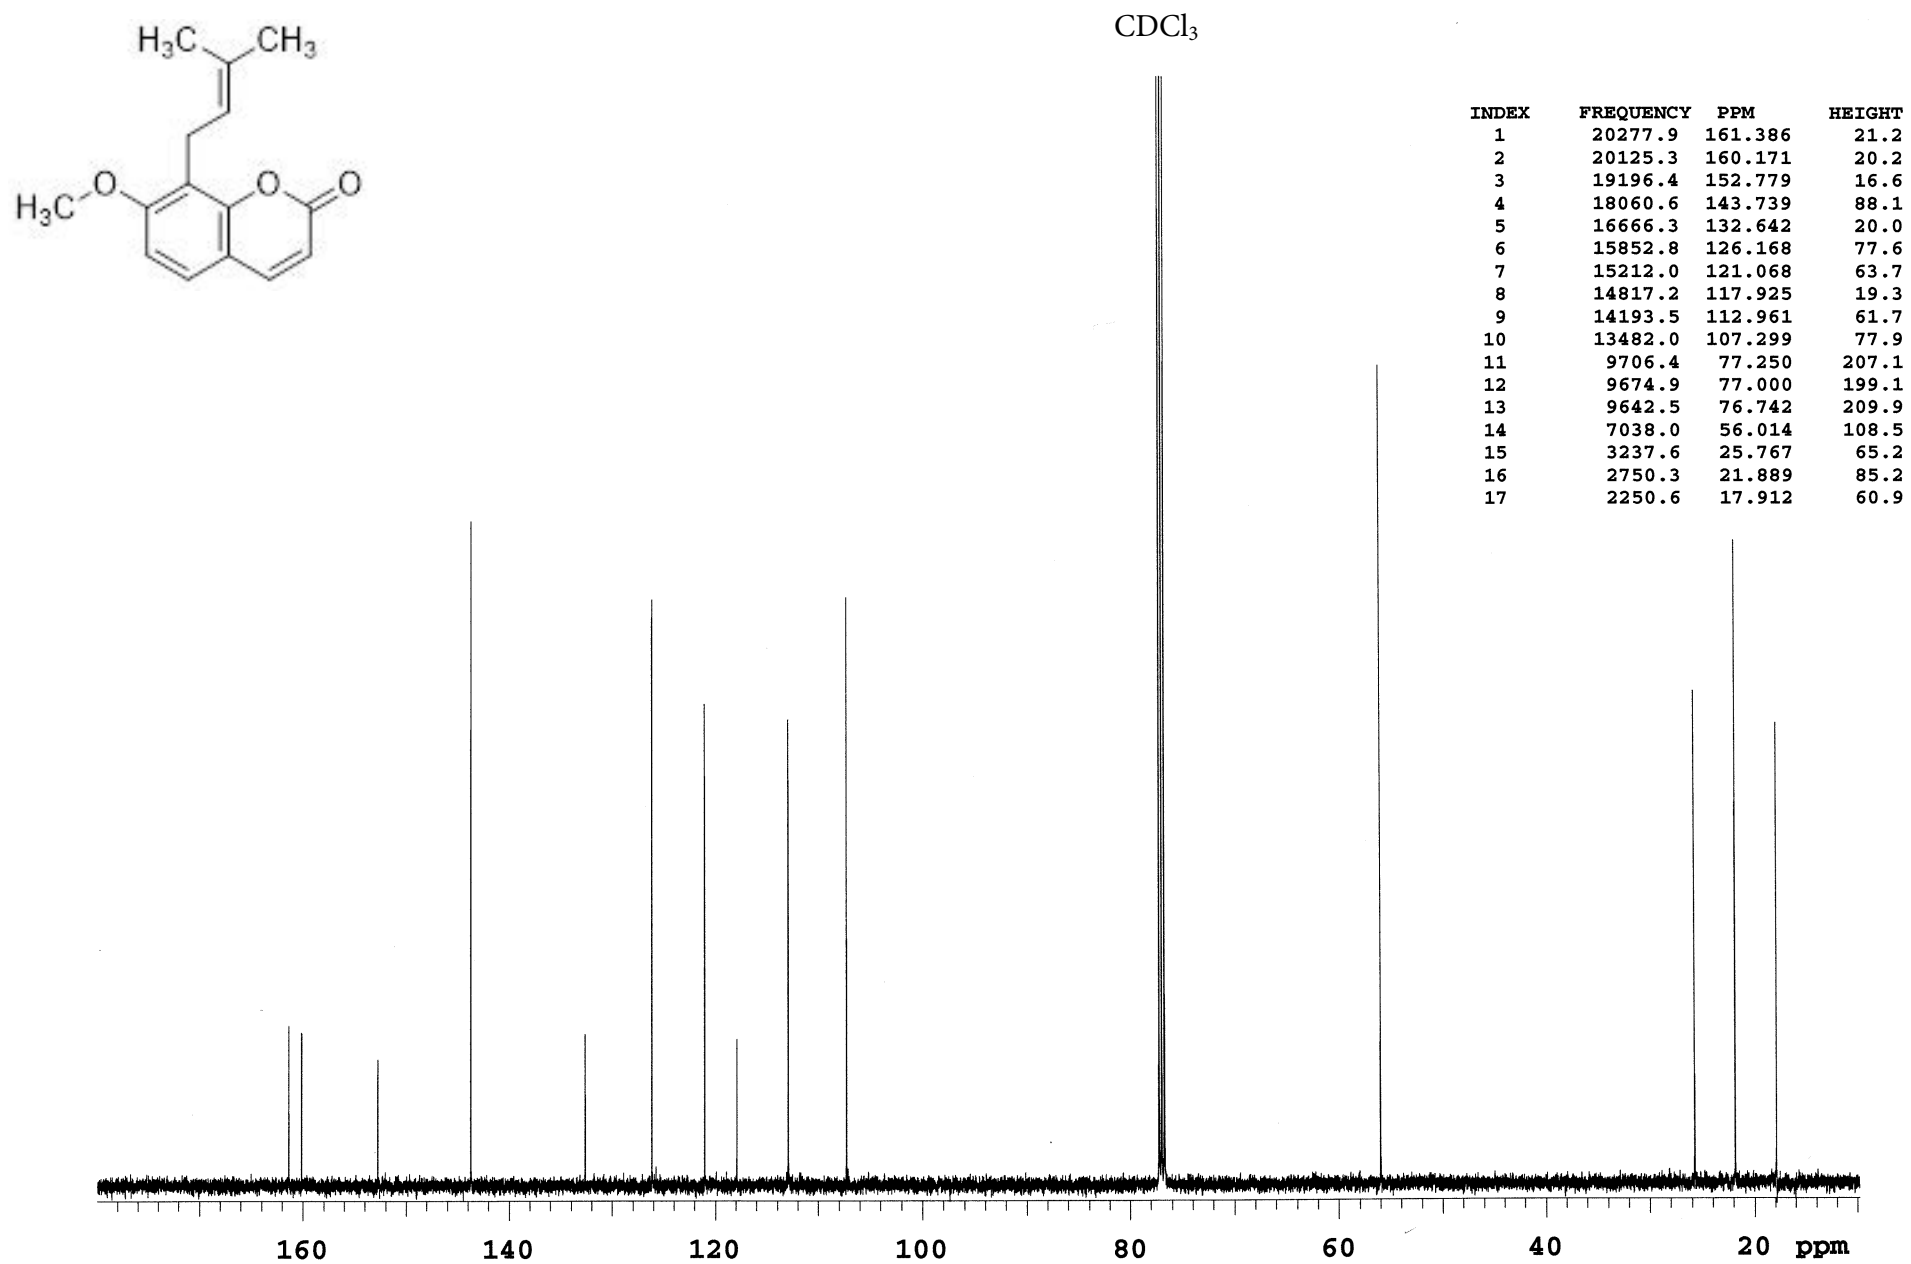

Figure S53.  $^1\text{H}$  NMR spectrum of oxypeucedanin in  $\text{CDCl}_3$

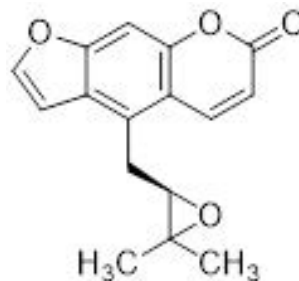

Sample Name:  
AD\_117\_73D  
Data Collected on:  
ahriman-vnmrs500  
Archive directory:  
/home/walkup/vnmrsys/data/amilad  
Sample directory:  
AD\_117\_73D\_20160122\_01  
FidFile: AD\_117\_73D\_PROTON\_01  
  
Pulse Sequence: PROTON (s2pul)  
Solvent: cdcl3  
Data collected on: Jan 22 2016

| INDEX | FREQUENCY | PPM   | HEIGHT |
|-------|-----------|-------|--------|
| 1     | 4094.7    | 8.191 | 14.2   |
| 2     | 4084.9    | 8.171 | 14.2   |
| 3     | 3795.4    | 7.587 | 25.0   |
| 4     | 3792.9    | 7.577 | 14.4   |
| 5     | 3619.3    | 7.240 | 14.4   |
| 6     | 3583.1    | 7.168 | 20.9   |
| 7     | 3464.7    | 6.931 | 12.9   |
| 8     | 3463.8    | 6.929 | 12.9   |
| 9     | 3462.8    | 6.927 | 12.3   |
| 10    | 3149.3    | 6.300 | 22.0   |
| 11    | 3139.5    | 6.280 | 21.7   |
| 12    | 2296.9    | 4.595 | 11.0   |
| 13    | 2292.5    | 4.586 | 10.4   |
| 14    | 2286.1    | 4.573 | 14.3   |
| 15    | 2281.7    | 4.564 | 14.1   |
| 16    | 2213.2    | 4.427 | 13.0   |
| 17    | 2206.9    | 4.415 | 13.0   |
| 18    | 2202.5    | 4.406 | 10.6   |
| 19    | 2196.1    | 4.393 | 9.6    |
| 20    | 1610.7    | 3.222 | 7.6    |
| 21    | 1606.3    | 3.213 | 8.3    |
| 22    | 1603.9    | 3.208 | 8.6    |
| 23    | 1599.5    | 3.200 | 7.6    |
| 24    | 693.7     | 1.388 | 100.8  |
| 25    | 655.1     | 1.310 | 97.9   |
| 26    | 611.5     | 1.223 | 9.9    |

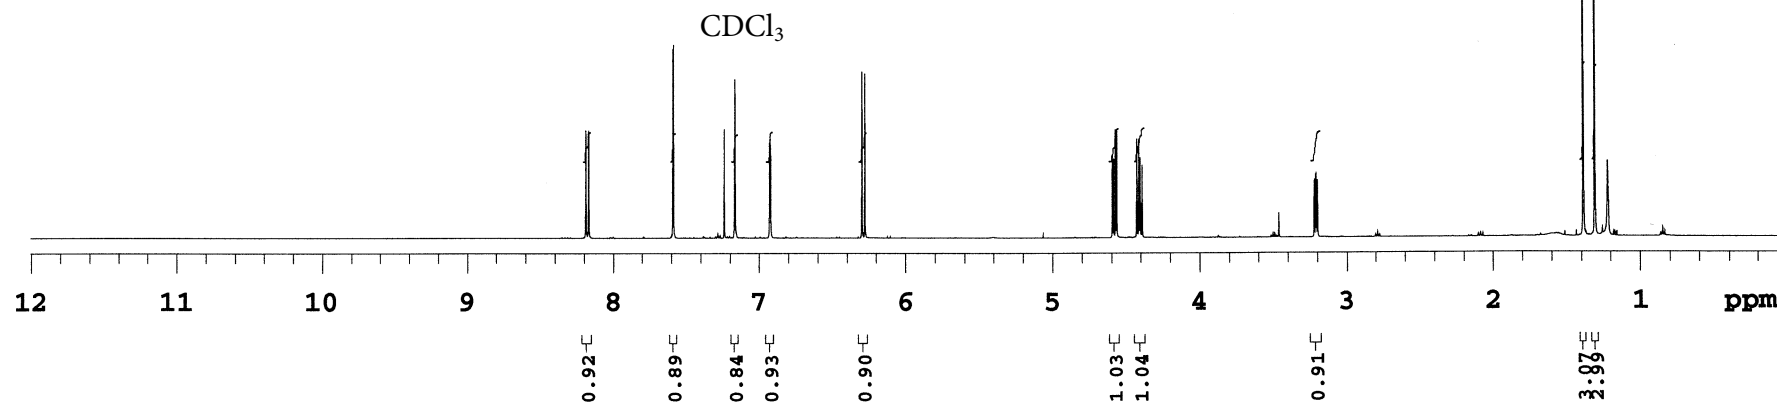



Figure S54. <sup>13</sup>C NMR spectrum of oxypeucedanin in CDCl<sub>3</sub>

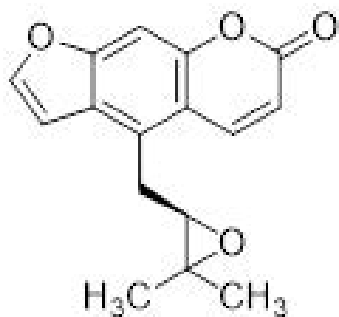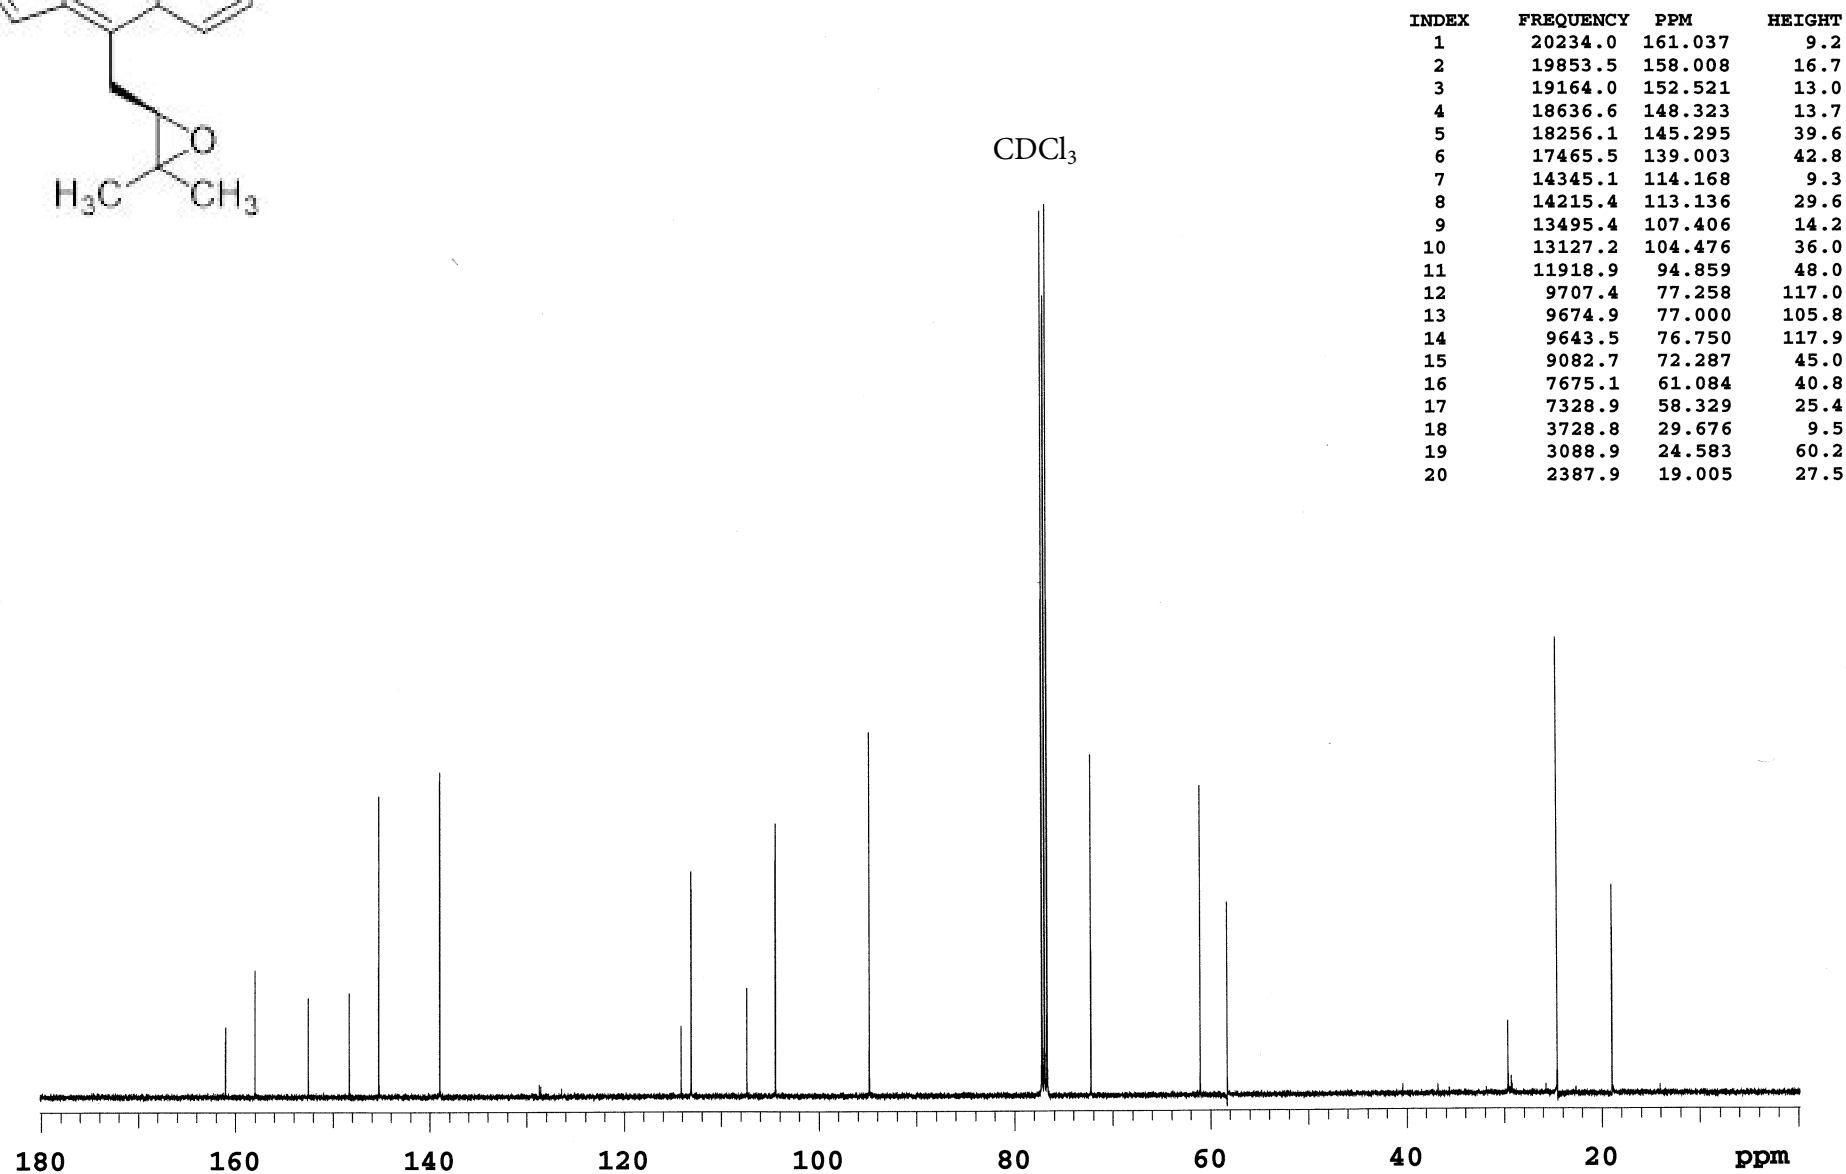

Figure S55.  $^1\text{H}$  NMR spectrum of malic acid in  $\text{CD}_3\text{OD}$

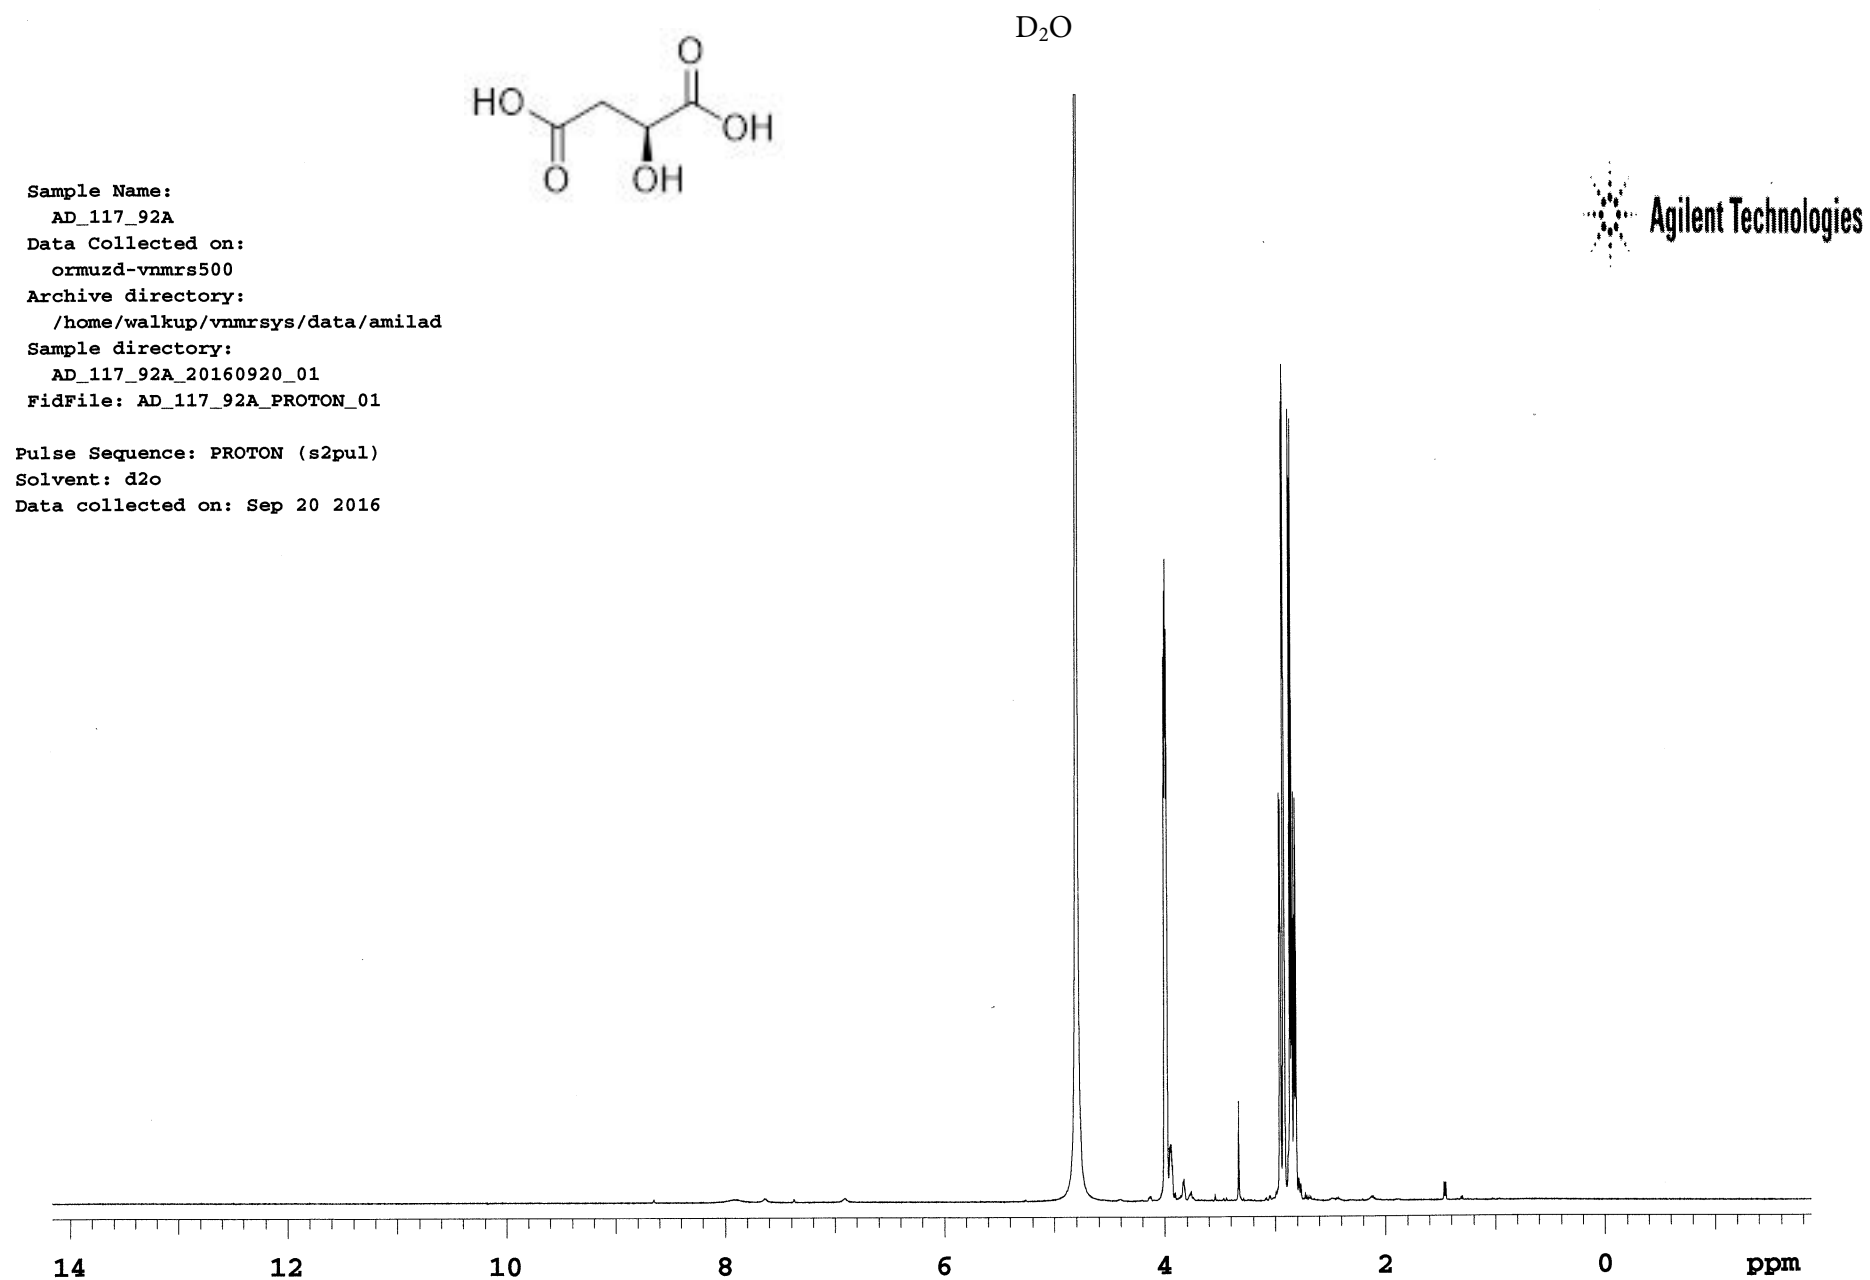

Figure S56. <sup>13</sup>C NMR spectrum of malic acid in CD<sub>3</sub>OD

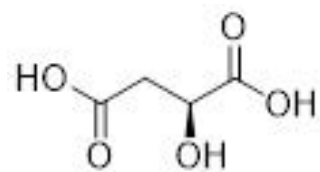

| INDEX | FREQUENCY | PPM     | HEIGHT |
|-------|-----------|---------|--------|
| 1     | 21898.0   | 174.279 | 22.5   |
| 2     | 21756.9   | 173.156 | 8.5    |
| 3     | 7540.5    | 60.012  | 4.2    |
| 4     | 6422.8    | 51.117  | 69.0   |
| 5     | 4313.2    | 34.328  | 121.6  |

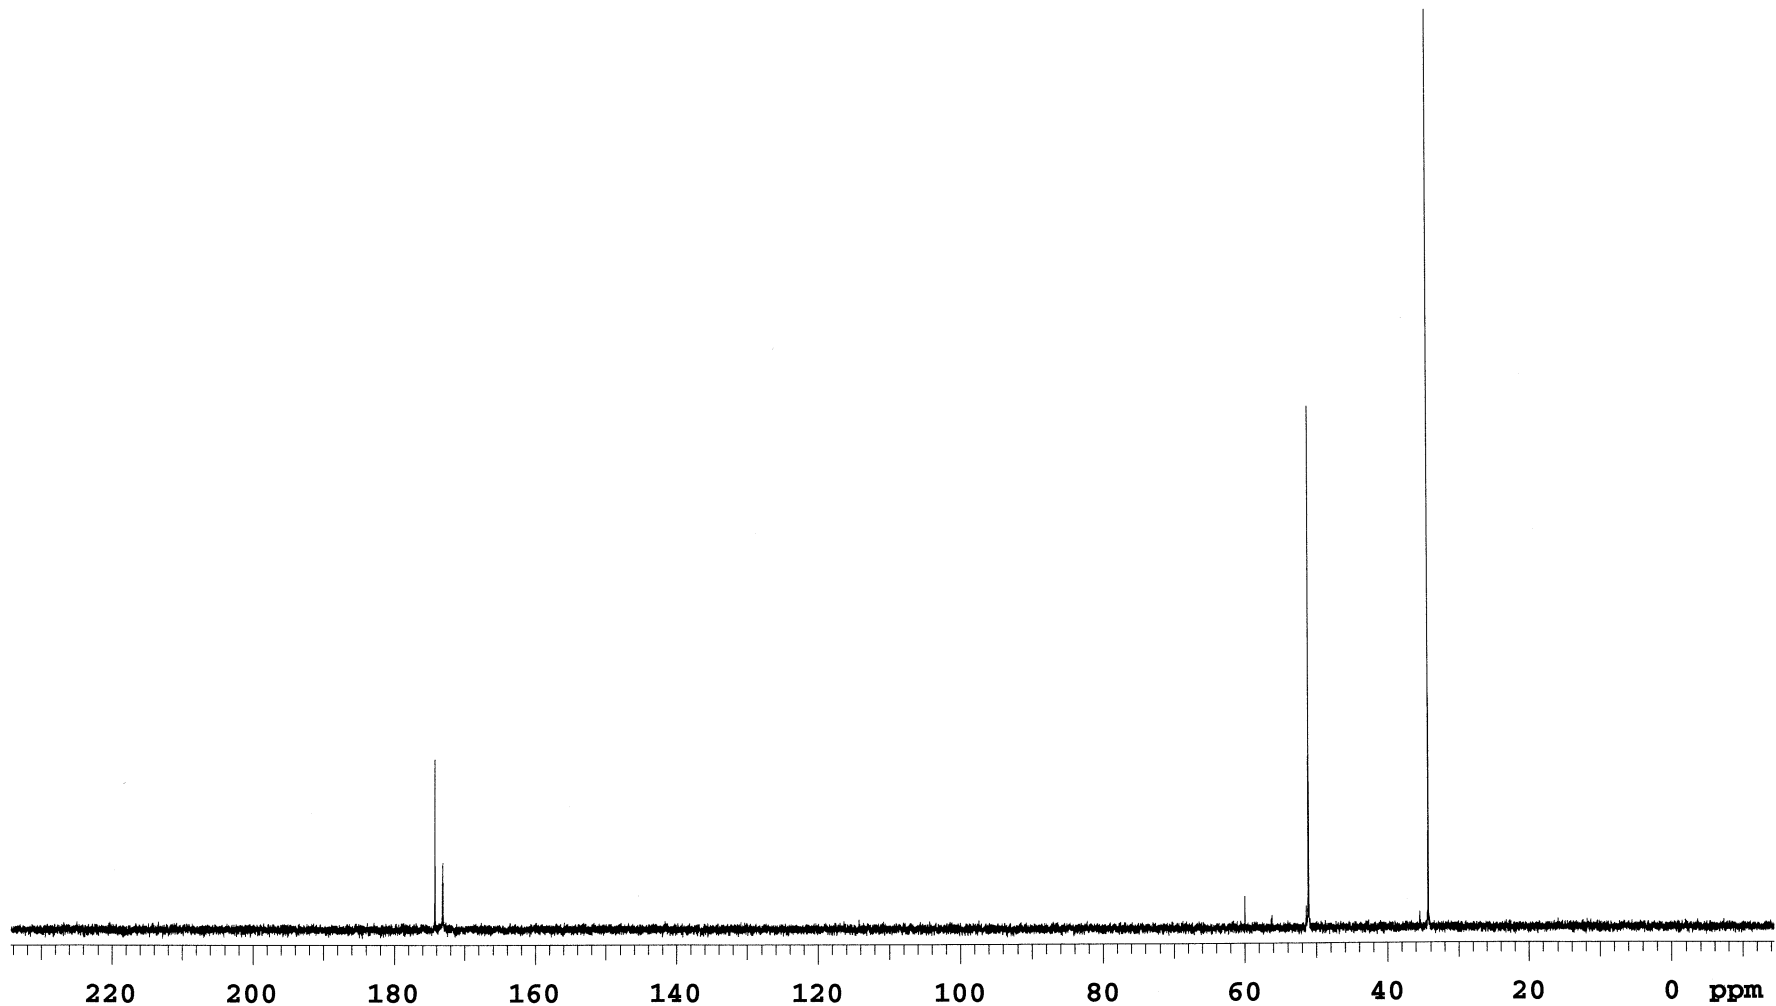

Figure S57.  $^1\text{H}$  NMR spectrum of *p*-coumaric acid in  $\text{CD}_3\text{OD}$

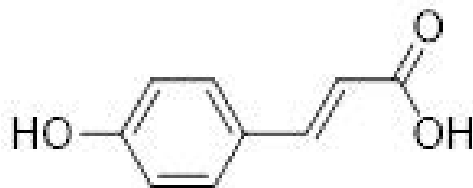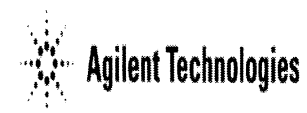

Sample Name:  
AD\_117\_94B\_CD3OD  
Data Collected on:  
ormuzd-vnmrs500  
Archive directory:  
/home/walkup/vnmrsys/data/amilad  
Sample directory:  
AD\_117\_94B\_CD3OD\_20161113\_01  
FidFile: AD\_117\_94B\_CD3OD\_PROTON\_01

Pulse Sequence: PROTON (s2pul)  
Solvent: cd3od  
Data collected on: Nov 13 2016

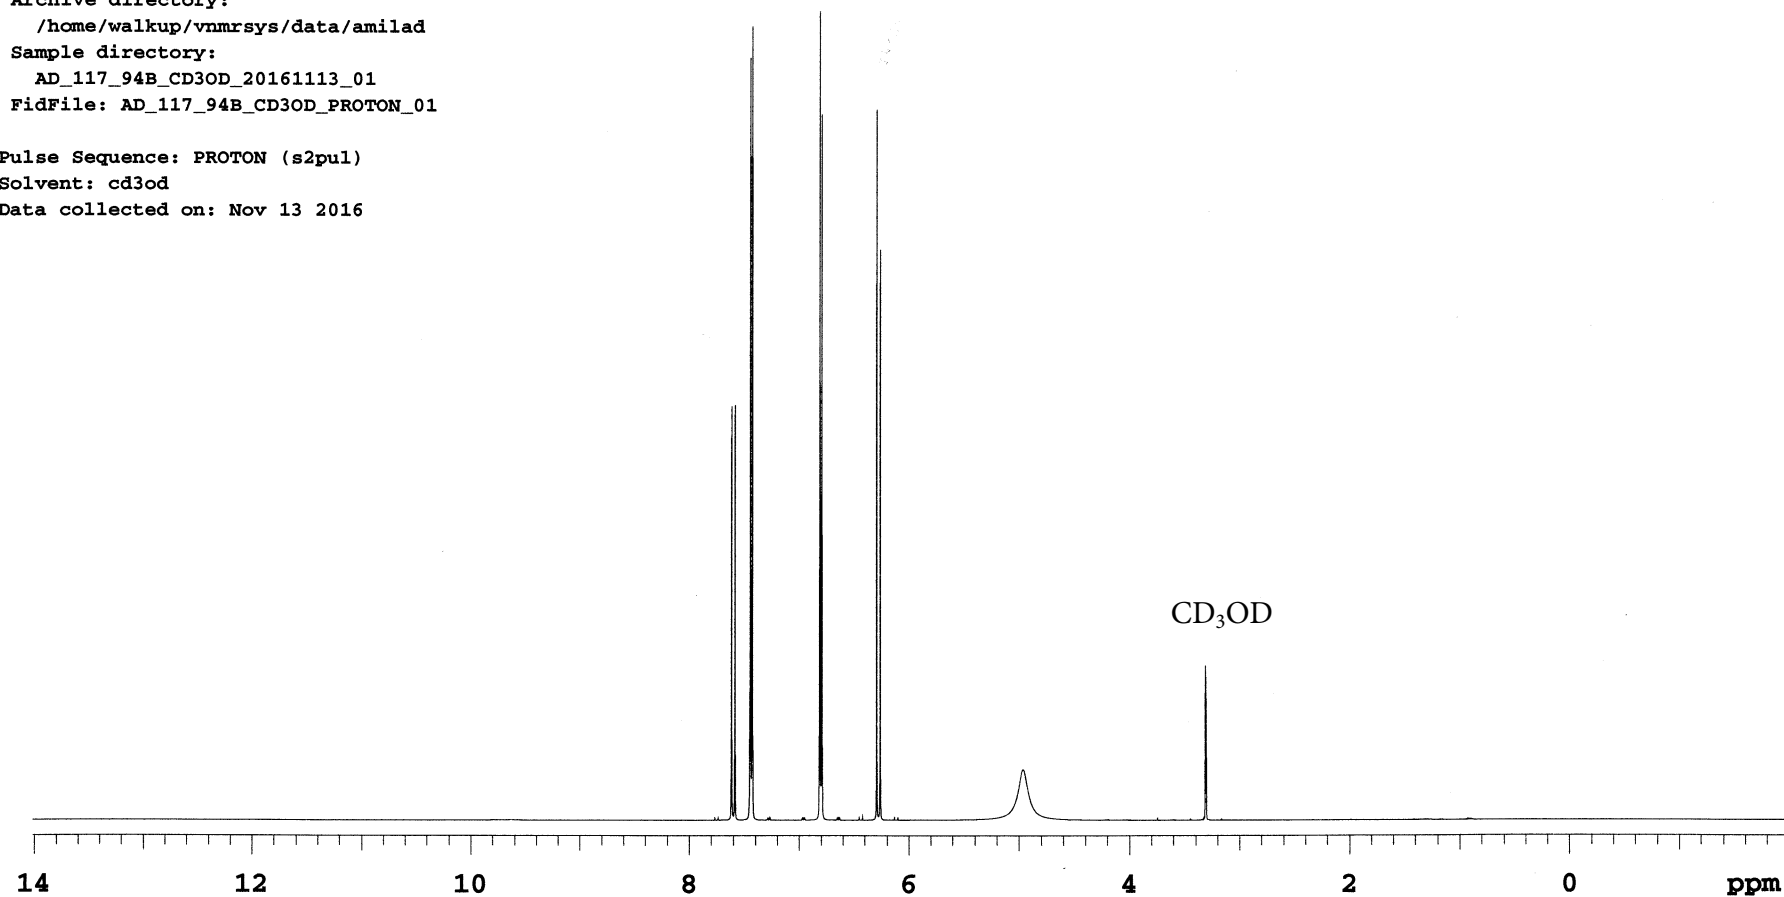

**Figure S58.**  $^{13}\text{C}$  NMR spectrum of *p*-coumaric acid in  $\text{CD}_3\text{OD}$

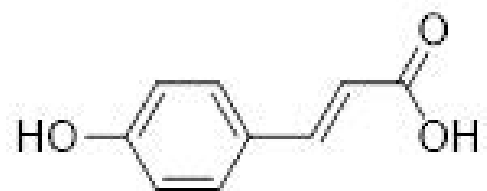

$\text{CD}_3\text{OD}$

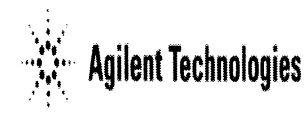

Sample Name:  
AD\_117\_94B\_CD3OD  
Data Collected on:  
ormuzd-vnmrs500  
Archive directory:  
/home/walkup/vnmrsys/data/amilad  
Sample directory:  
AD\_117\_94B\_CD3OD\_20161113\_01  
FidFile: AD\_117\_94B\_CD3OD\_CARBON\_01

Pulse Sequence: CARBON (s2pul)  
Solvent: cd3od  
Data collected on: Nov 13 2016

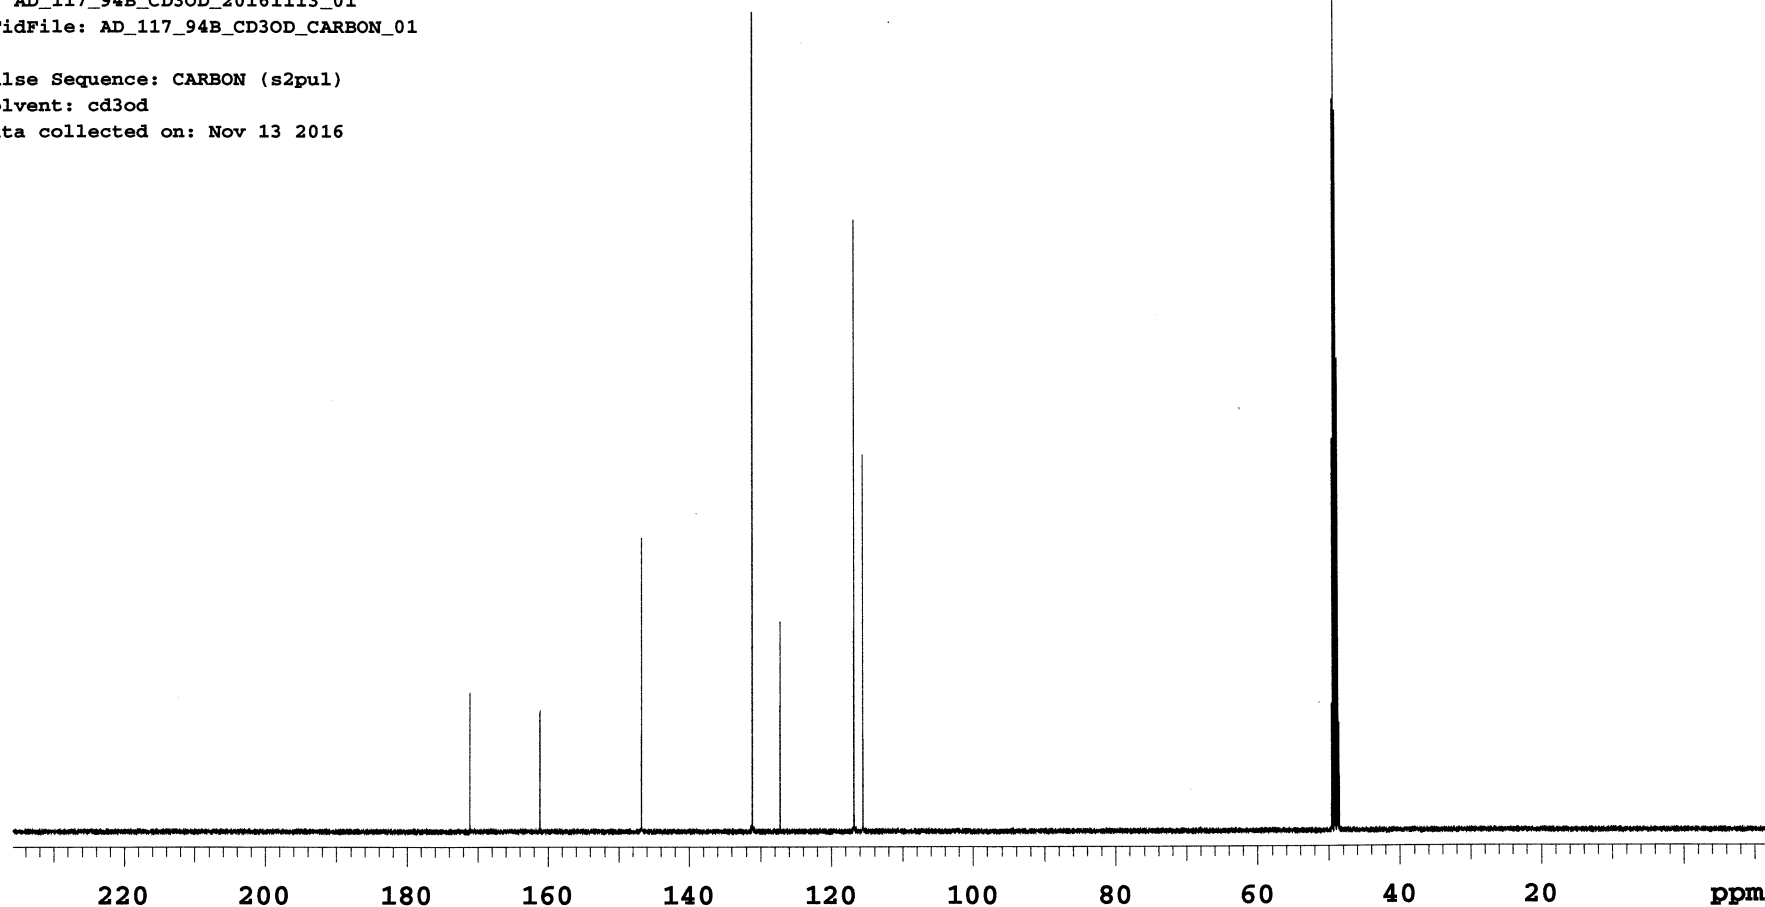

**Figure S59.**  $^1\text{H}$  NMR spectrum of 3-phenyllactic acid in  $\text{D}_2\text{O}$

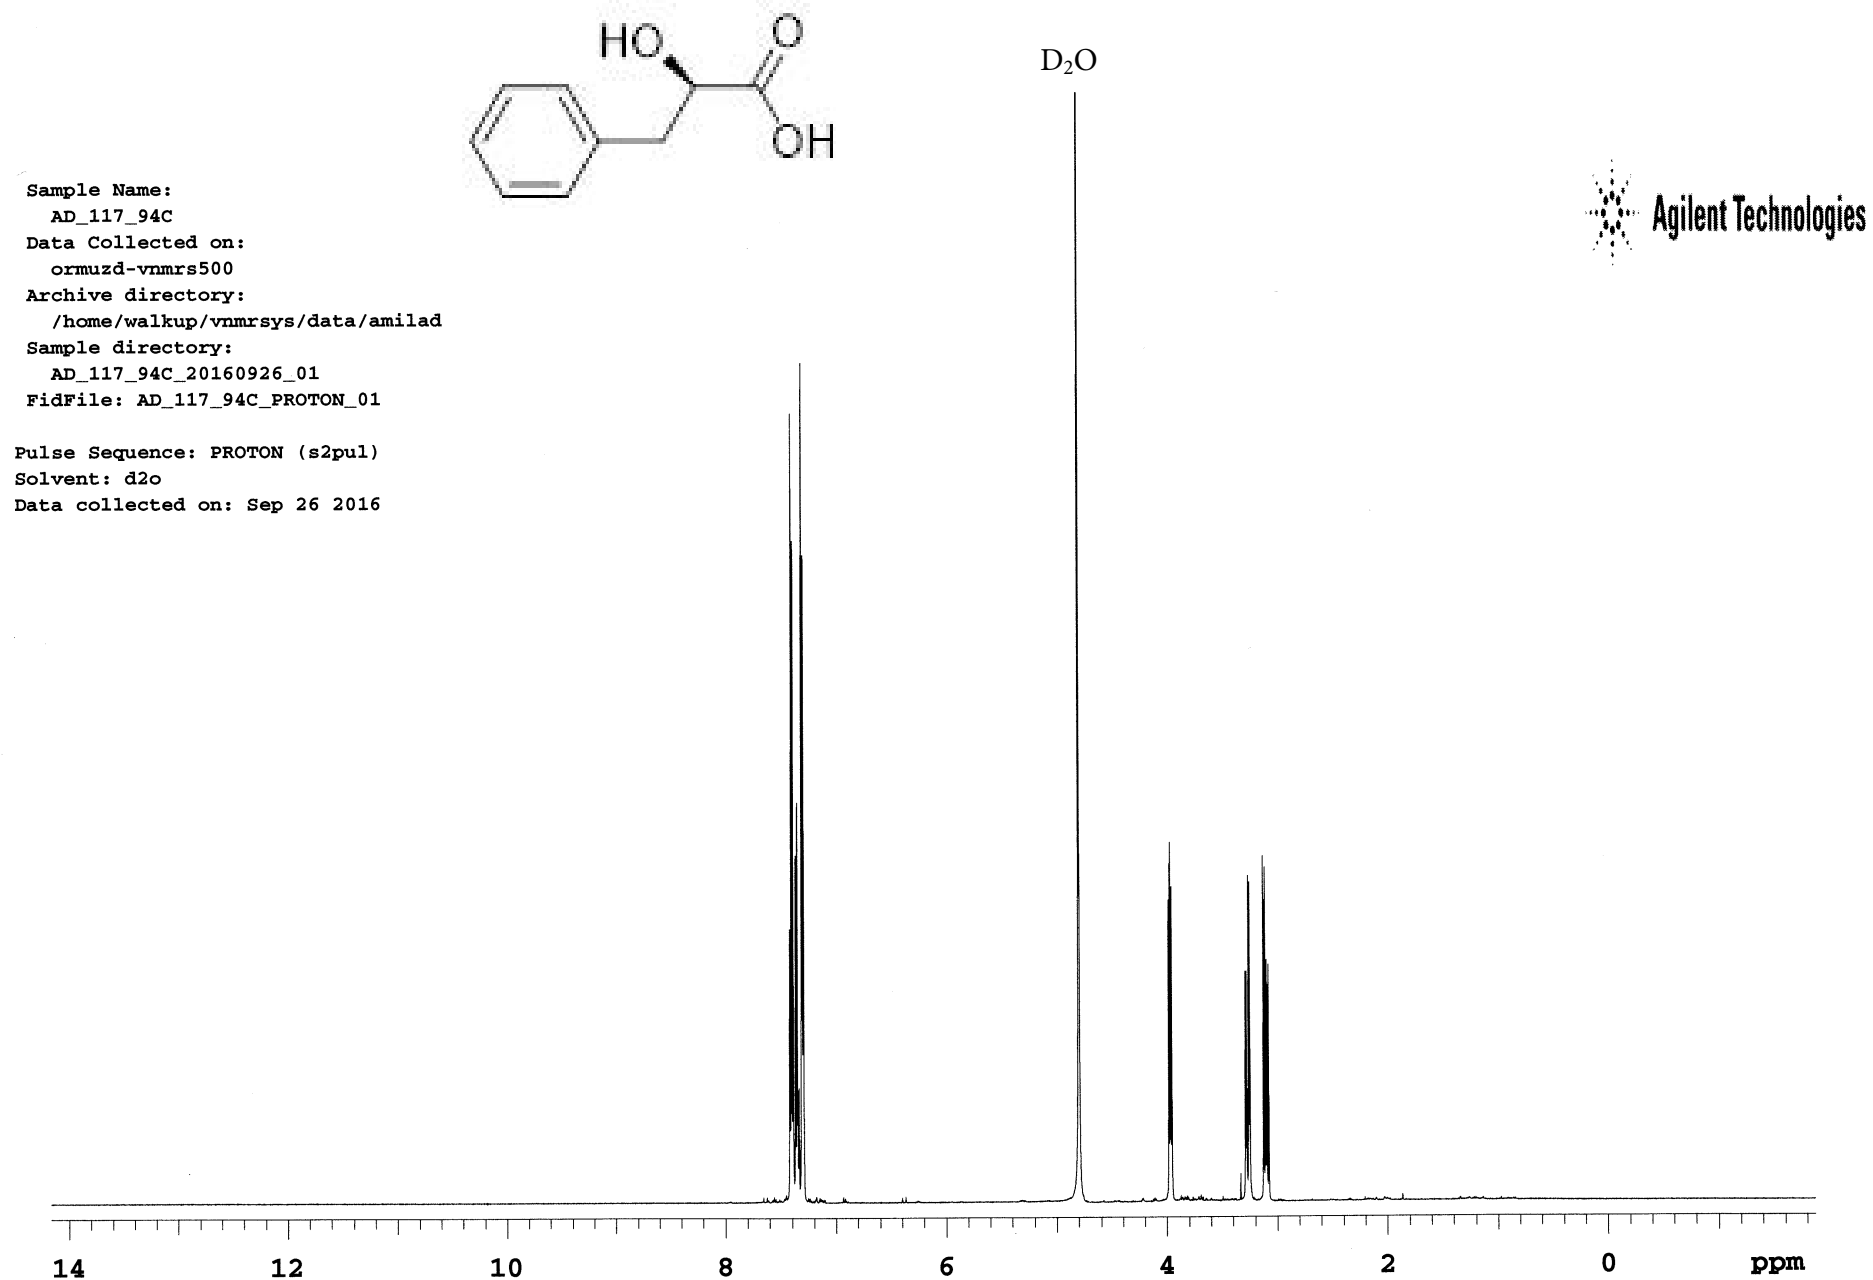

**Figure S60.**  $^{13}\text{C}$  NMR spectrum of 3-phenyllactic acid in  $\text{D}_2\text{O}$

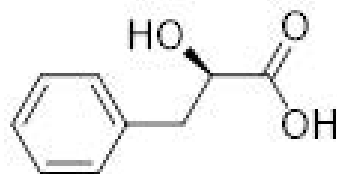

Sample Name:  
AD\_117\_94C  
Data Collected on:  
ormuzd-vnmrs500  
Archive directory:  
/home/walkup/vnmrsys/data/amilad  
Sample directory:  
AD\_117\_94C\_20160926\_02  
FidFile: AD\_117\_94C\_CARBON\_01

Pulse Sequence: CARBON (s2pul)  
Solvent: d2o  
Data collected on: Sep 26 2016

| INDEX | FREQUENCY | PPM     | HEIGHT |
|-------|-----------|---------|--------|
| 1     | 21842.7   | 173.839 | 9.8    |
| 2     | 16957.0   | 134.956 | 14.7   |
| 3     | 16239.9   | 129.248 | 94.1   |
| 4     | 16209.4   | 129.005 | 108.5  |
| 5     | 16032.0   | 127.593 | 41.9   |
| 6     | 7026.4    | 55.921  | 28.7   |
| 7     | 4552.6    | 36.233  | 45.8   |

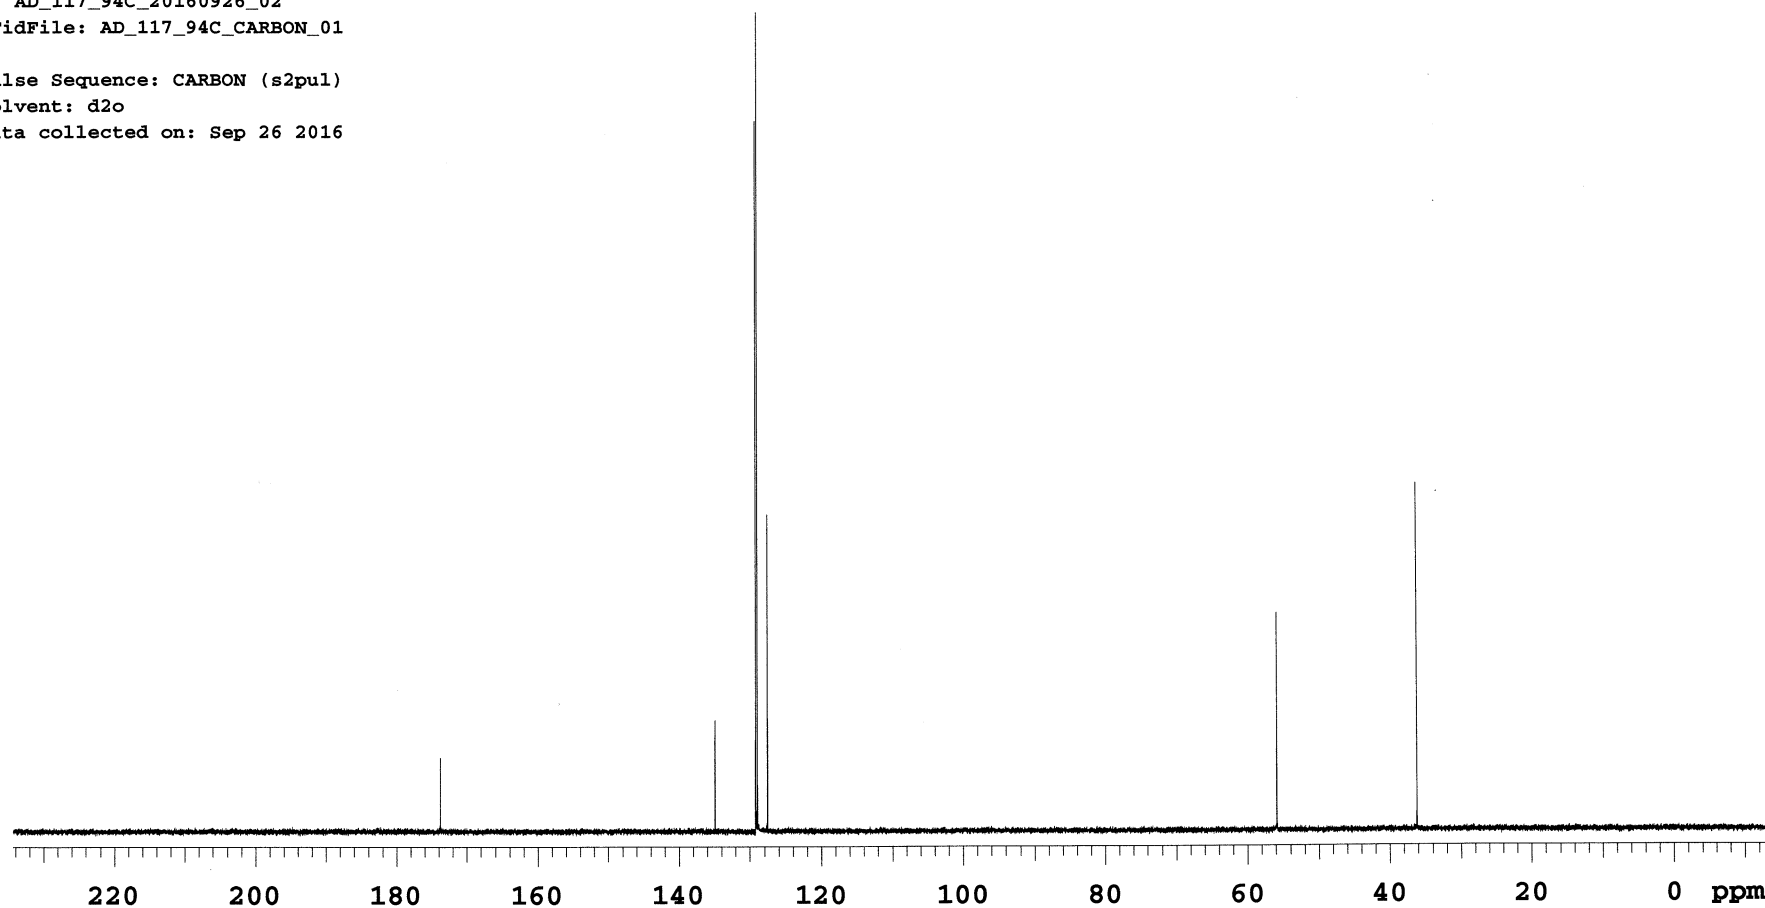

**Figure S61.** DEPT spectrum of 3-phenyllactic acid in D<sub>2</sub>O

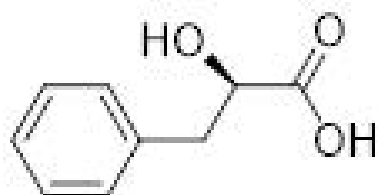

AD\_117\_94C

Sample Name AD\_117\_94C  
Date collected 2016-09-27

Pulse sequence DEPT  
Solvent d2o

Temperature 25  
Spectrometer ormuzd-vnmrs500

Study owner amilad  
Operator amilad

CH3 carbons

CH2 carbons

CH carbons

quaternary carbons

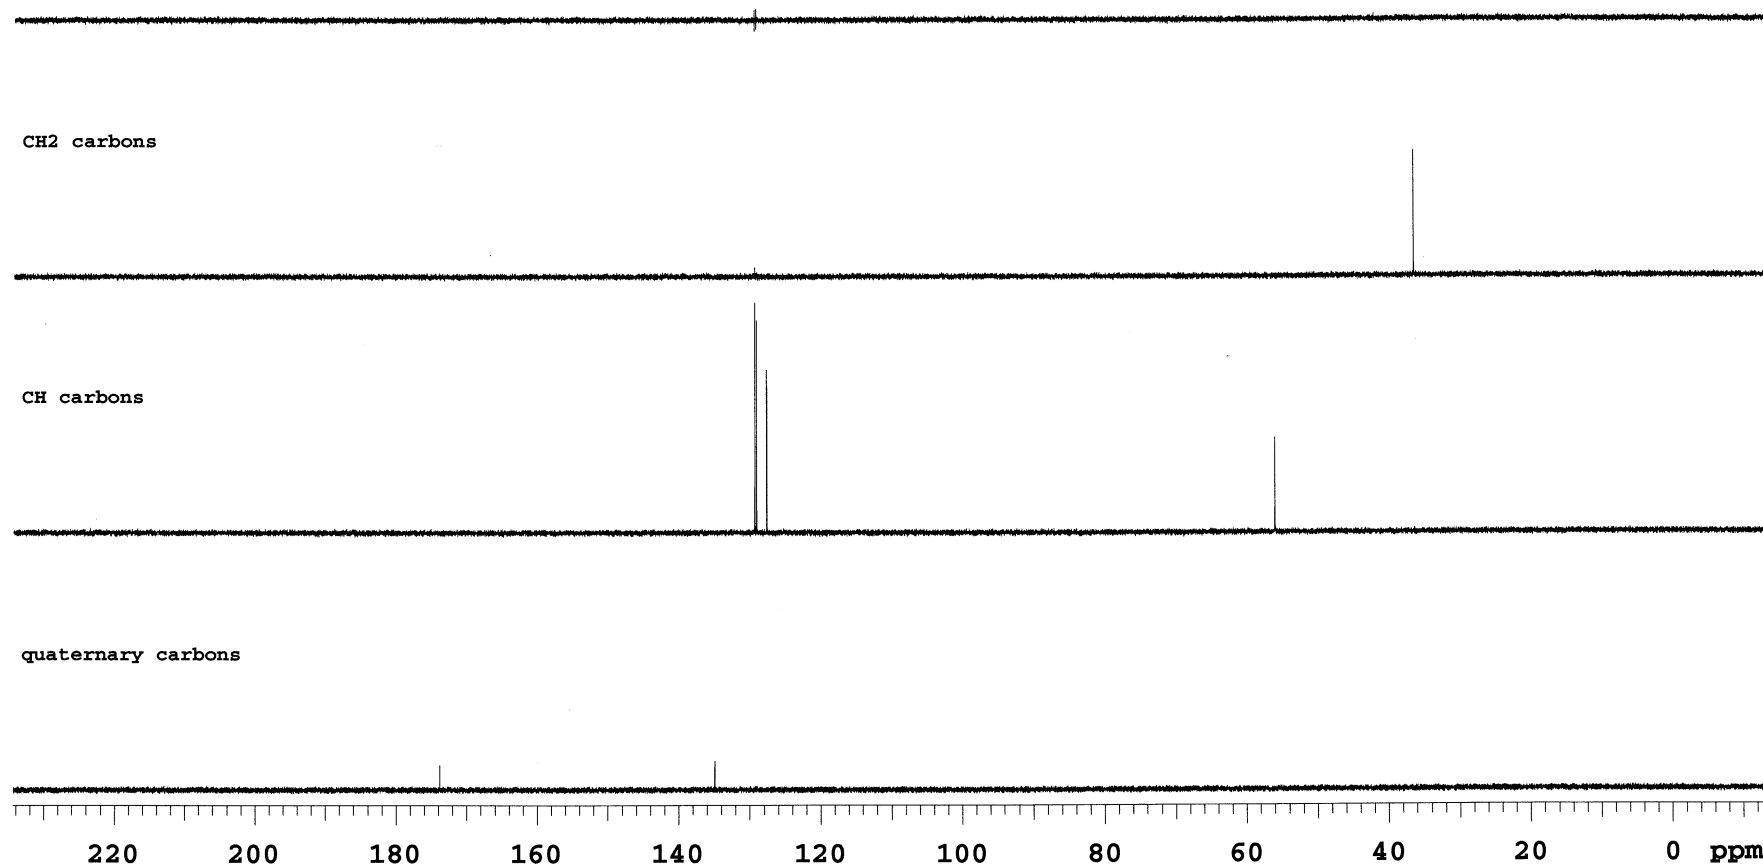



Figure S62. HMBC spectrum of 3-phenyllactic acid in D<sub>2</sub>O

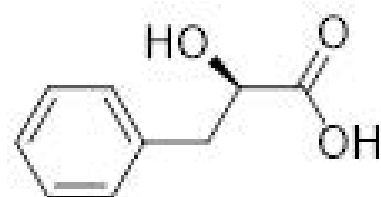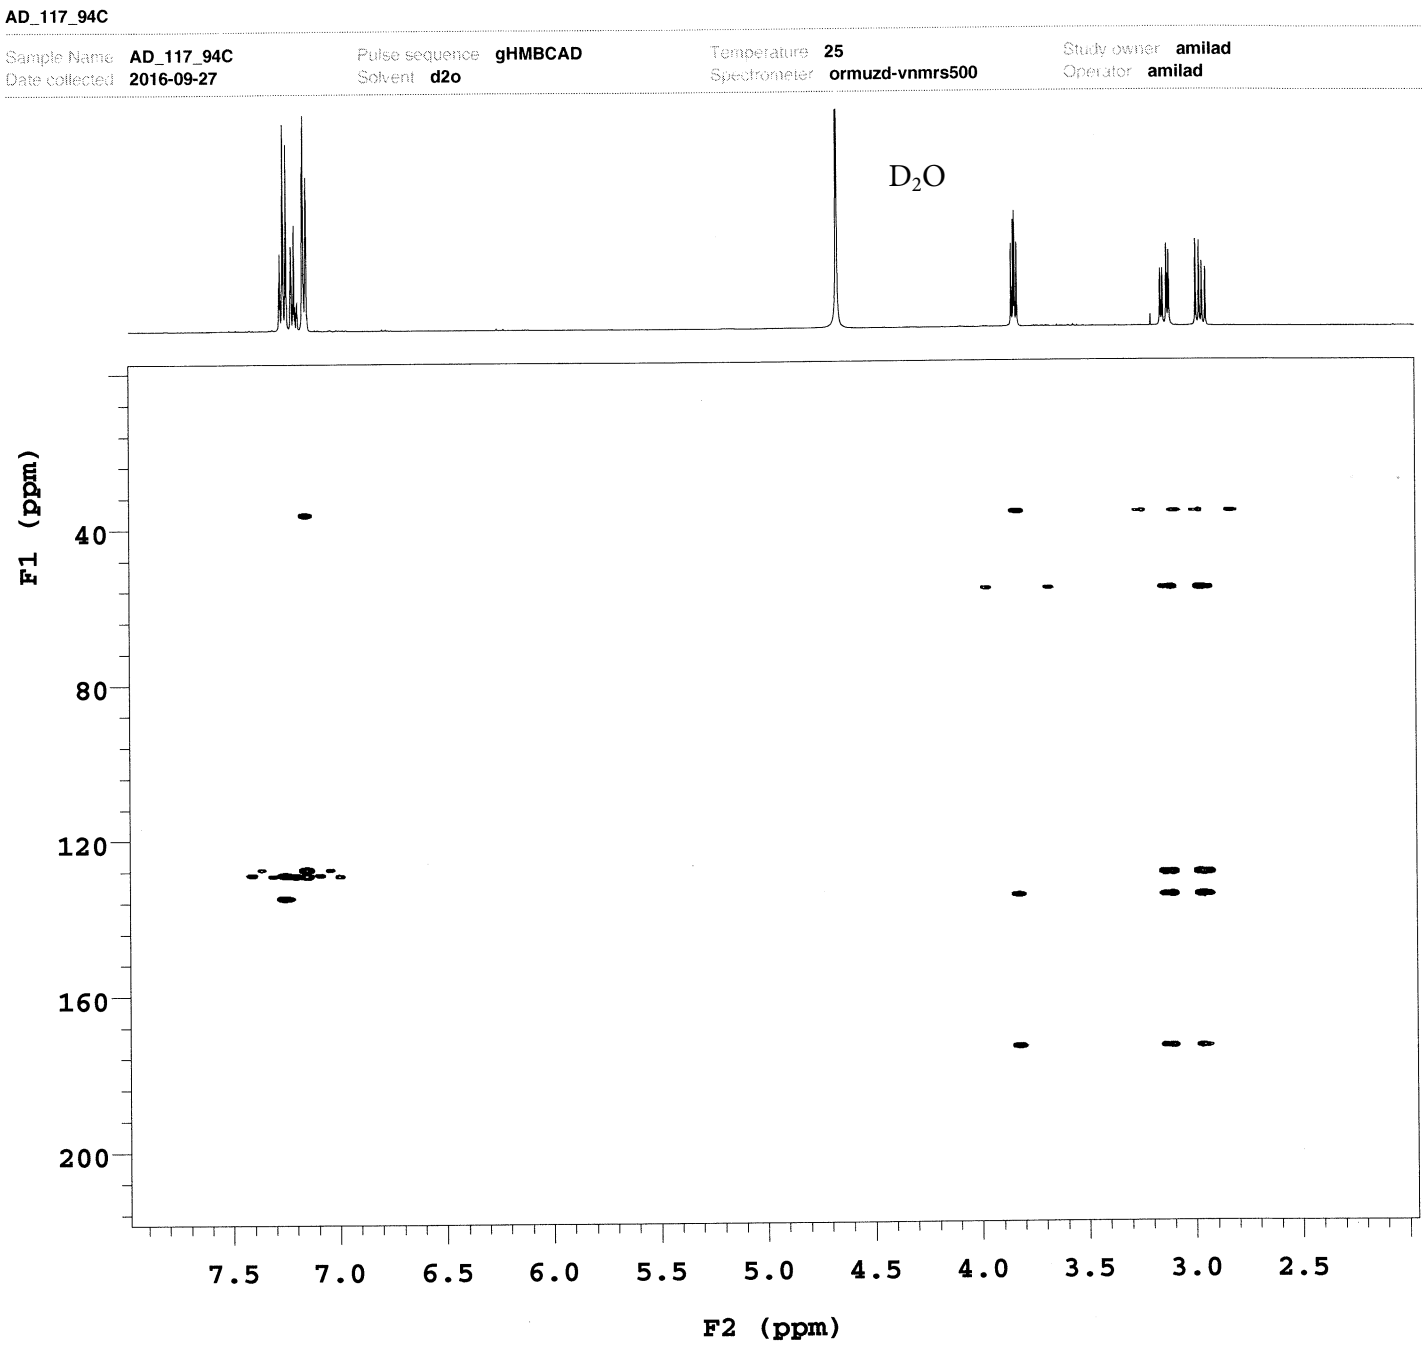

Figure S63. <sup>1</sup>H NMR spectrum of ferulic acid in CD<sub>3</sub>OD

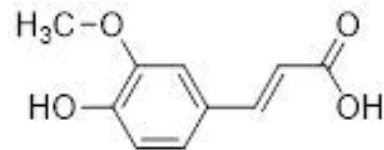

Sample Name:  
AD\_117\_91A\_CD3OD  
Data Collected on:  
ormuzd-vnmrs500  
Archive directory:  
/home/walkup/vnmrsys/data/amilad  
Sample directory:  
AD\_117\_91A\_CD3OD\_20161113\_01  
FidFile: AD\_117\_91A\_CD3OD\_PROTON\_01

Pulse Sequence: PROTON (s2pul)  
Solvent: cd3od  
Data collected on: Nov 13 2016

CD<sub>3</sub>OH

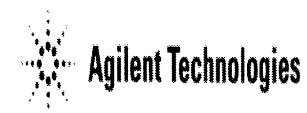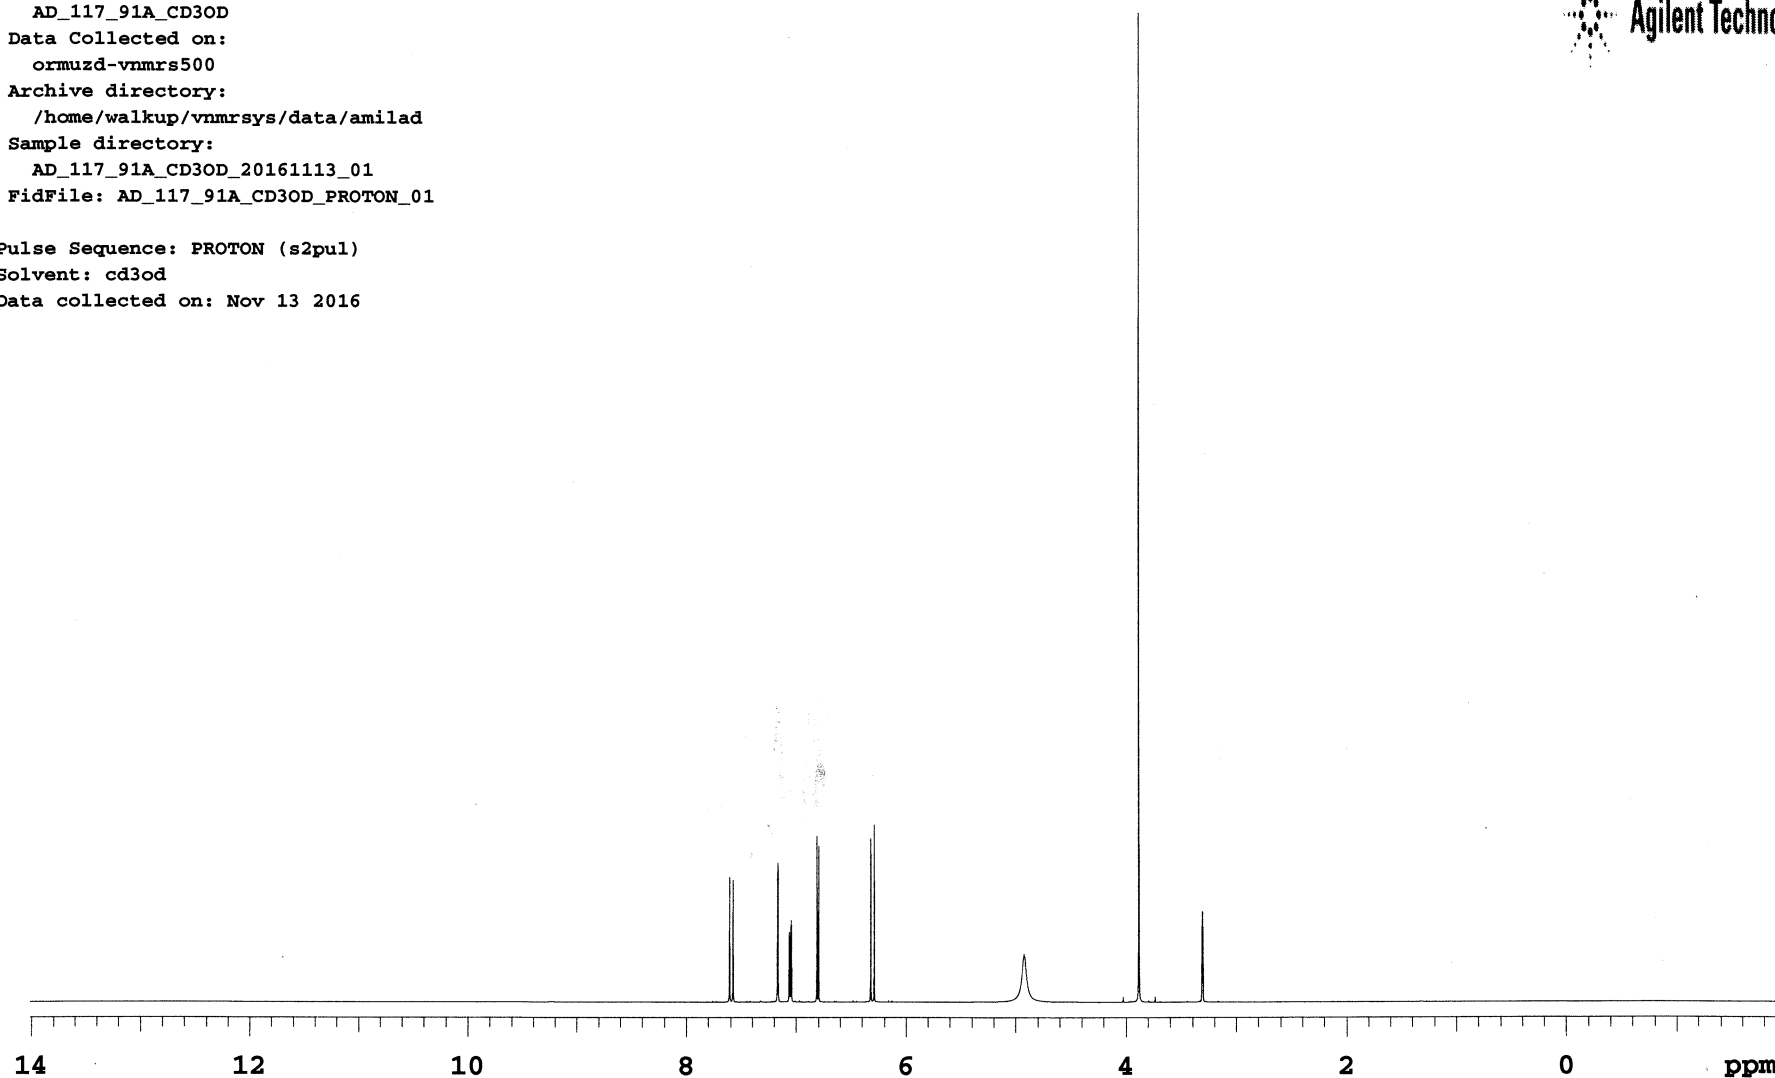

Figure S64. <sup>13</sup>C NMR spectrum of ferulic acid in CD<sub>3</sub>OD

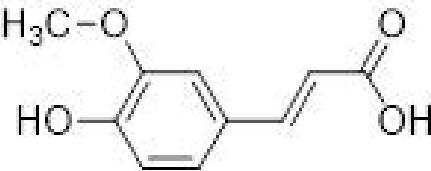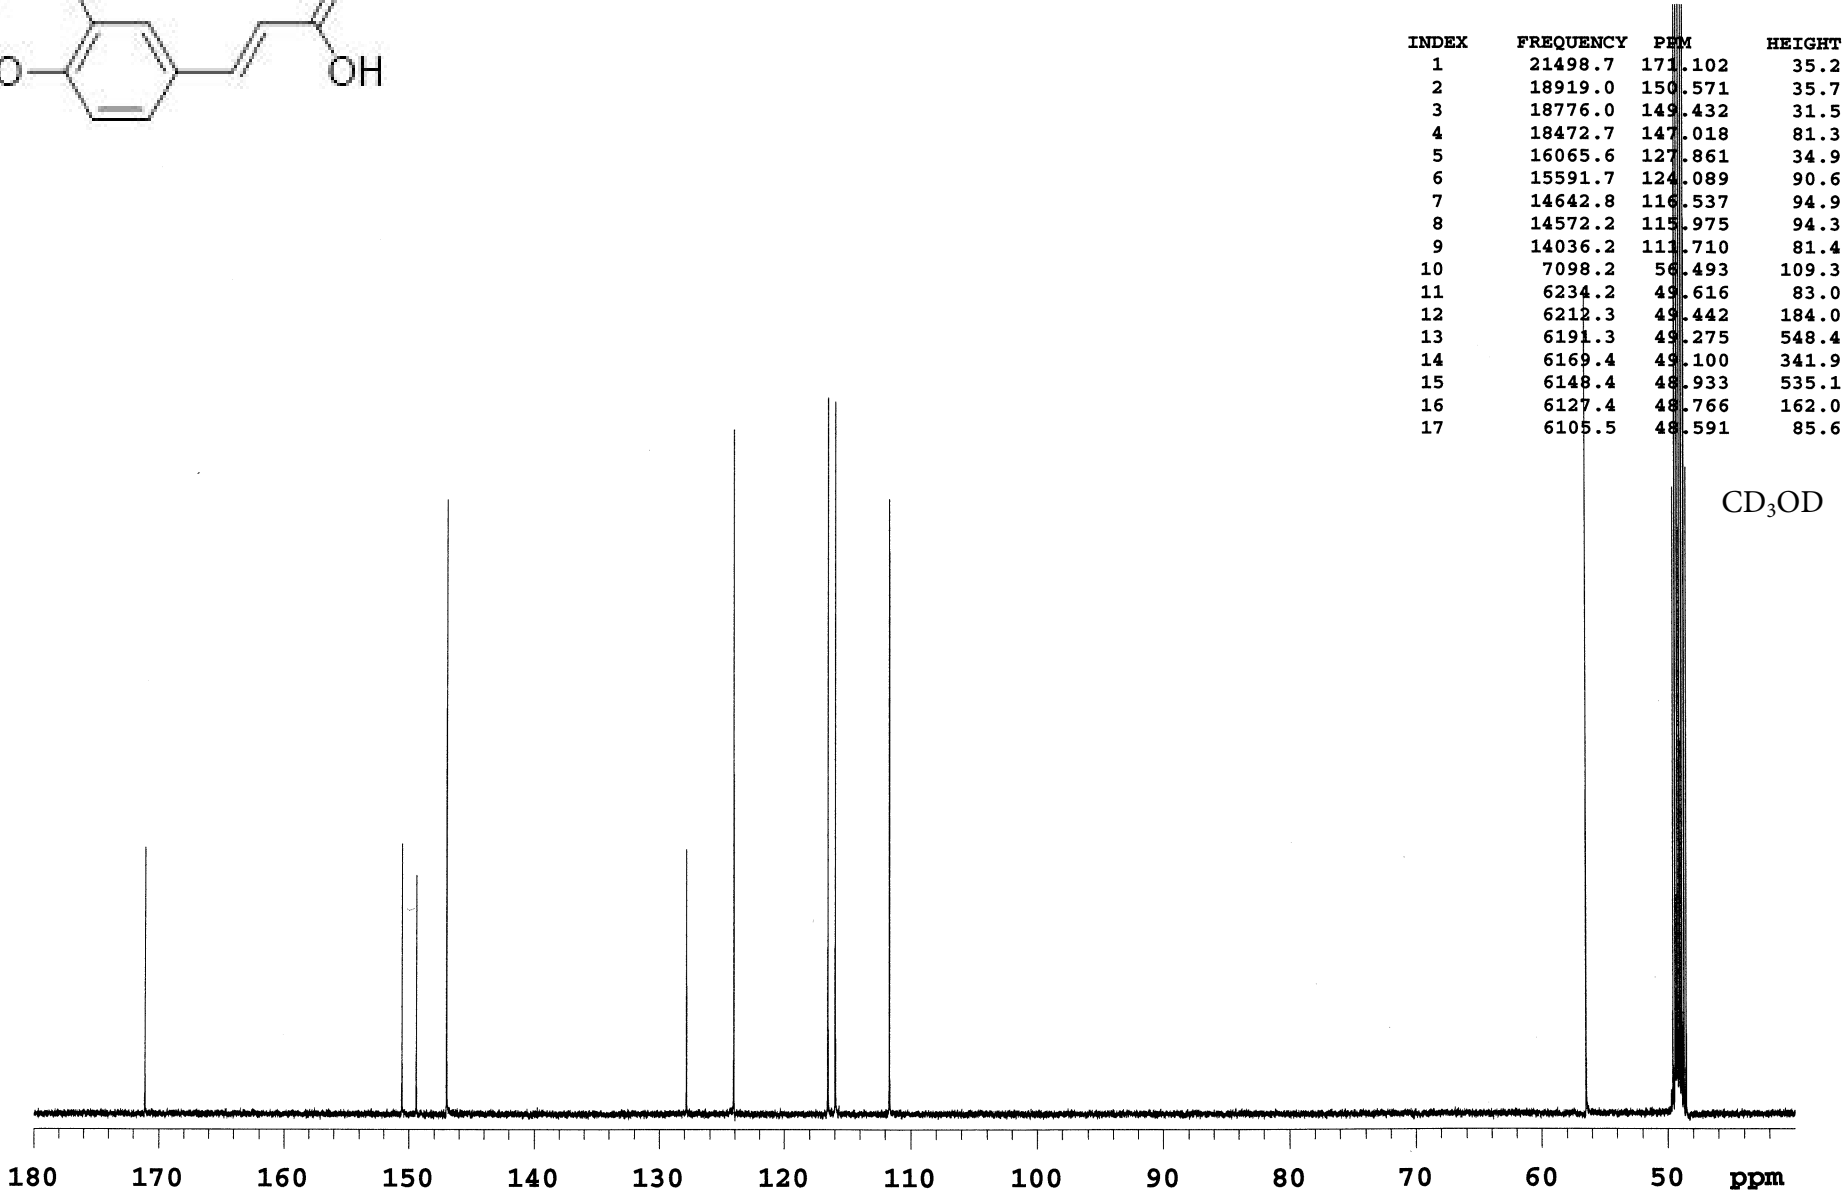

**Figure S65.** DEPT spectrum of ferulic acid in CD<sub>3</sub>OD

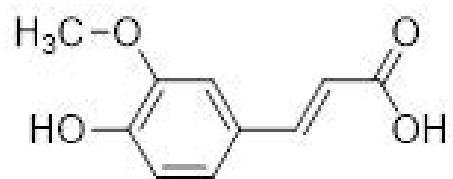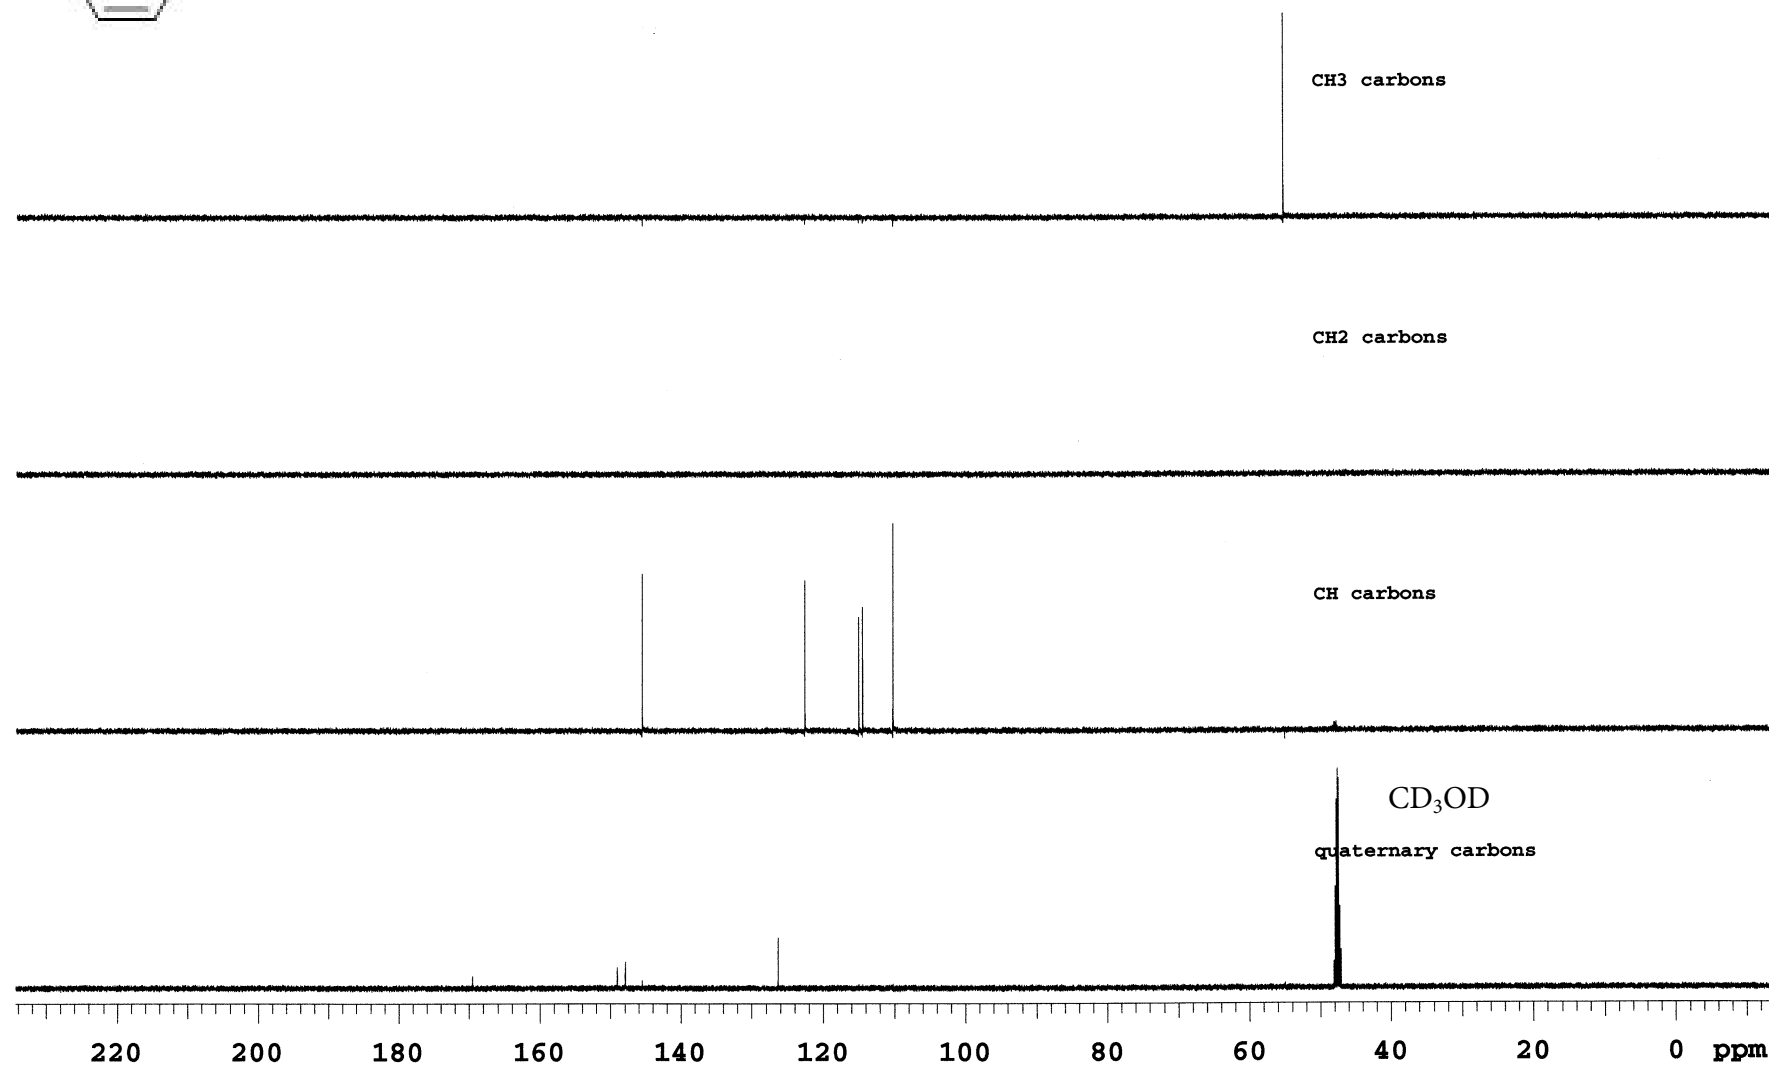

**Table 2.** LPO and COX assay results for known compounds isolated from *P. haussknechtii*

| Compound       | Concentration | LPO <sup>a,b</sup> | COX-1 <sup>a,c</sup> | COX-2 <sup>a,c</sup> |
|----------------|---------------|--------------------|----------------------|----------------------|
|                |               | (fluorescence)     | (Inhibition %)       | (Inhibition %)       |
| isoimperatorin | 92.6 $\mu$ M  | 65.5 $\pm$ 0.7     | 25.0 $\pm$ 4.7       | 16.1 $\pm$ 1.8       |
| osthol         | 102.5 $\mu$ M | 56.0 $\pm$ 0.5     | 58.7 $\pm$ 0.1       | 57.0 $\pm$ 3.1       |
|                | 51.2 $\mu$ M  | ND <sup>d</sup>    | 46.7 $\pm$ 5.7       | 39.8 $\pm$ 0.2       |
|                | 25.6 $\mu$ M  | ND <sup>d</sup>    | 35.8 $\pm$ 0.6       | 21.0 $\pm$ 0.2       |
|                | 12.8 $\mu$ M  | ND <sup>d</sup>    | 19.6 $\pm$ 1.9       | 10.5 $\pm$ 0.2       |
| oxypeucedanin  | 87.4 $\mu$ M  | 38.5 $\pm$ 0.4     | 20.5 $\pm$ 0.6       | 29.7 $\pm$ 1.8       |
| malic acid     | 186.5 $\mu$ M | 73.0 $\pm$ 0.8     | 12.2 $\pm$ 1.1       | 13.5 $\pm$ 1.8       |
|                |               |                    |                      |                      |

<sup>a</sup>Values are expressed as mean  $\pm$  SEM (n = 2). <sup>b</sup>Commercial antioxidants BHT, BHA and TBHQ with IC<sub>50</sub> values of 10  $\mu$ M, 6.9  $\mu$ M and 5  $\mu$ M, respectively. <sup>c</sup>The standards aspirin, ibuprofen and naproxen with IC<sub>50</sub> values of 600  $\mu$ M, 72.8  $\mu$ M and 52.2  $\mu$ M, respectively for the inhibition of COX-1 enzyme activity and Celebrex® and naproxen with IC<sub>50</sub> values of 1.3  $\mu$ M and 52.2  $\mu$ M, respectively for the inhibition of COX-2 enzyme activity.
